# Supplementary material
Source: PubMed Central journal article supplement (PMC6583581)

## Supplemental Online Content

Azoulay E, Lemiale V, Mokart D, et al. Effect of high-flow nasal oxygen vs standard oxygen on 28-day mortality in immunocompromised patients with acute respiratory failure: the HIGH randomized clinical trial. *JAMA*. doi:10.1001/jama.2018.14282

**eTable.** Oxygenation and Ventilation 6 Hours After Randomization

**eFigure 1.** Cumulative Incidence of Mechanical Ventilation

**eFigure 2.** Respiratory Rate and PaO<sub>2</sub>:FIO<sub>2</sub> Ratio

**eFigure 3.** Patient Comfort and Dyspnea

This supplementary material has been provided by the authors to give readers additional information about their work.

**eTable. Oxygenation and Ventilation 6 Hours After Randomization**

| <b>Number (%) unless otherwise noted</b>                                                              | <b>High-flow oxygen therapy, (N=388)</b> | <b>Standard Oxygen, (N=388)</b> |
|-------------------------------------------------------------------------------------------------------|------------------------------------------|---------------------------------|
| Invasive mechanical ventilation                                                                       | 39 (10.0)                                | 46 (11.8)                       |
| Respiratory rate (/min, median [interquartile range]))                                                | 25 [20-30]                               | 26 [21-31]                      |
| Standard oxygen only                                                                                  | 0                                        | 342 (88.2)                      |
| Oxygen flow (L/min, median [interquartile range]))                                                    | 50 [50-60]                               | 8 [6-15]                        |
| Noninvasive ventilation                                                                               | 0                                        | 0                               |
| High-flow oxygen therapy in non-intubated patients                                                    | 349 (100)                                | 0                               |
| FiO <sub>2</sub> (median [interquartile range])                                                       | 70 [60-90]                               | /                               |
| PaO <sub>2</sub> /FiO <sub>2</sub> ratio six hours after randomization (median [interquartile range]) | 150 [104-230]                            | 119 [86-165]                    |

**eFigure 1. Cumulative Incidence of Mechanical Ventilation**

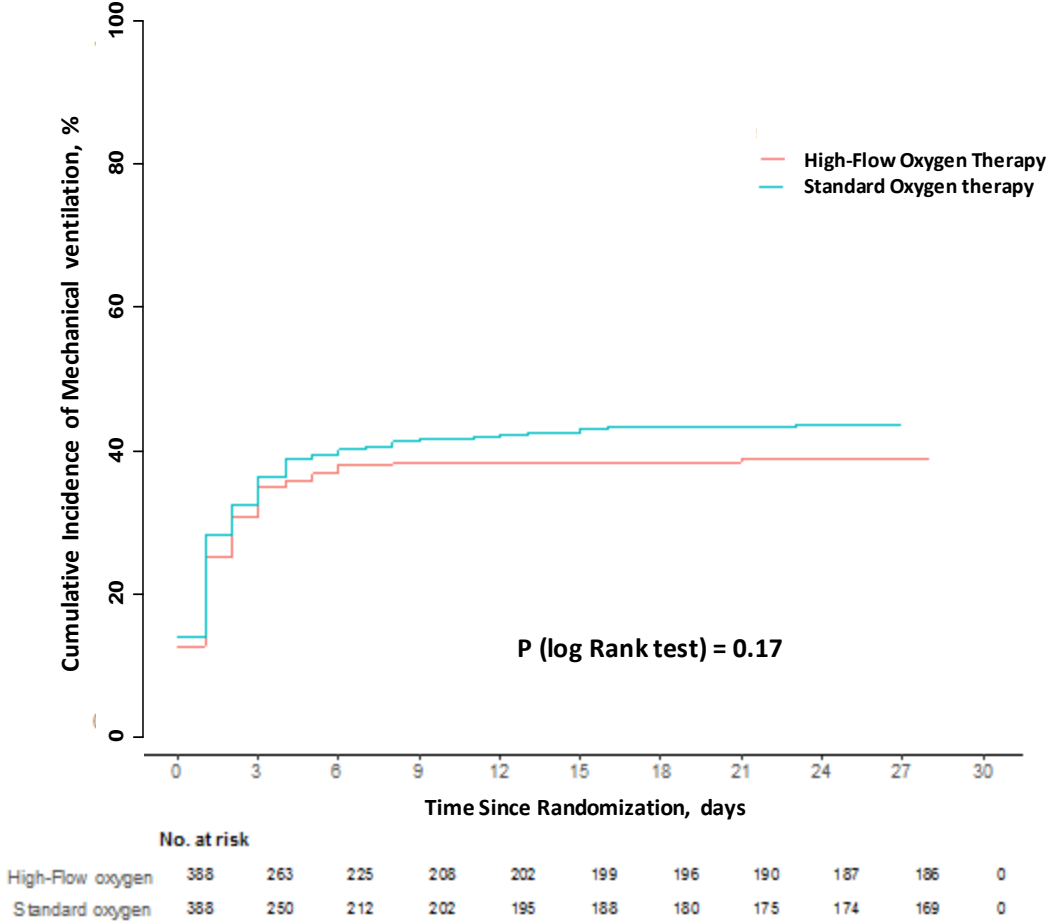

eFigure 2. Respiratory Rate and PaO<sub>2</sub>:FIO<sub>2</sub> Ratio

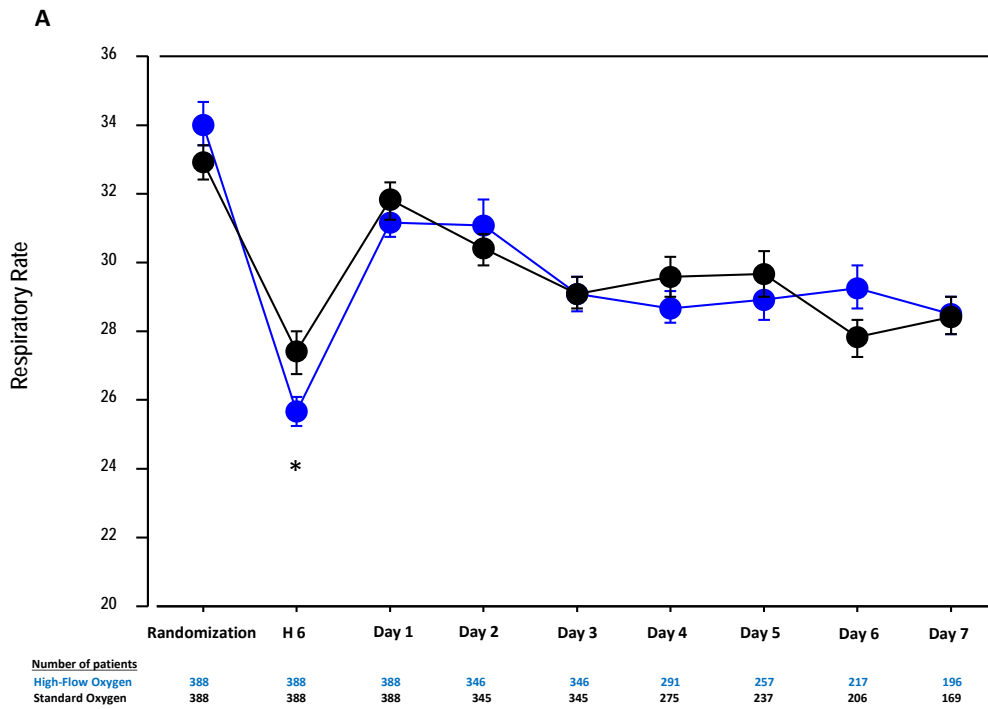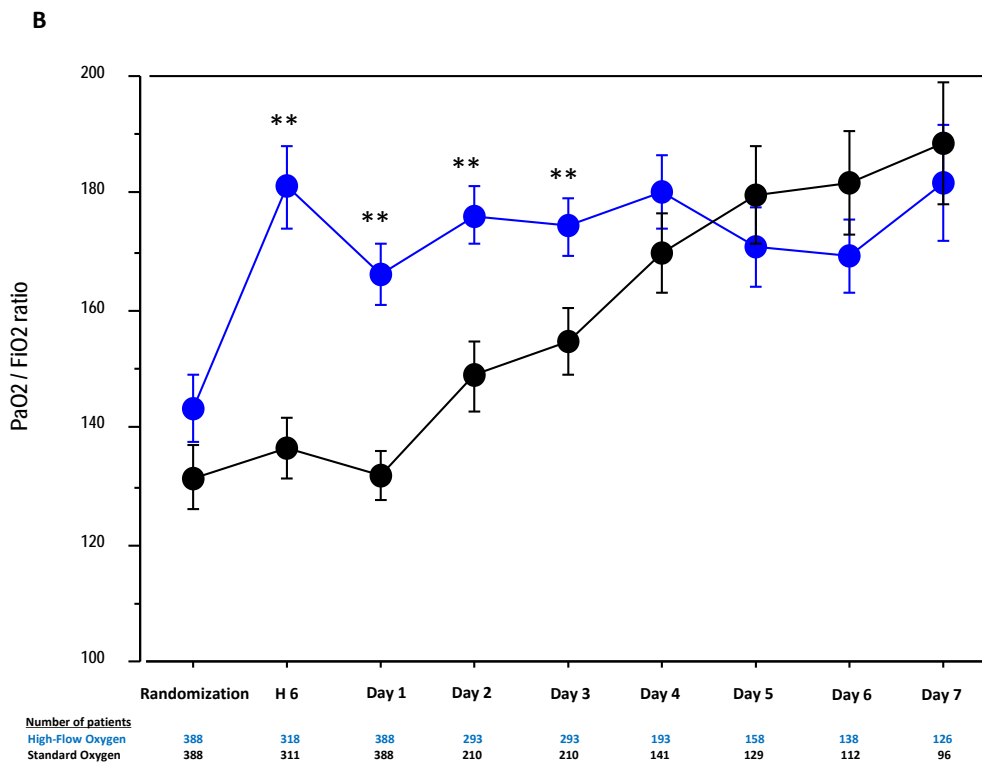

**eFigure 3. Patient Comfort and Dyspnea**

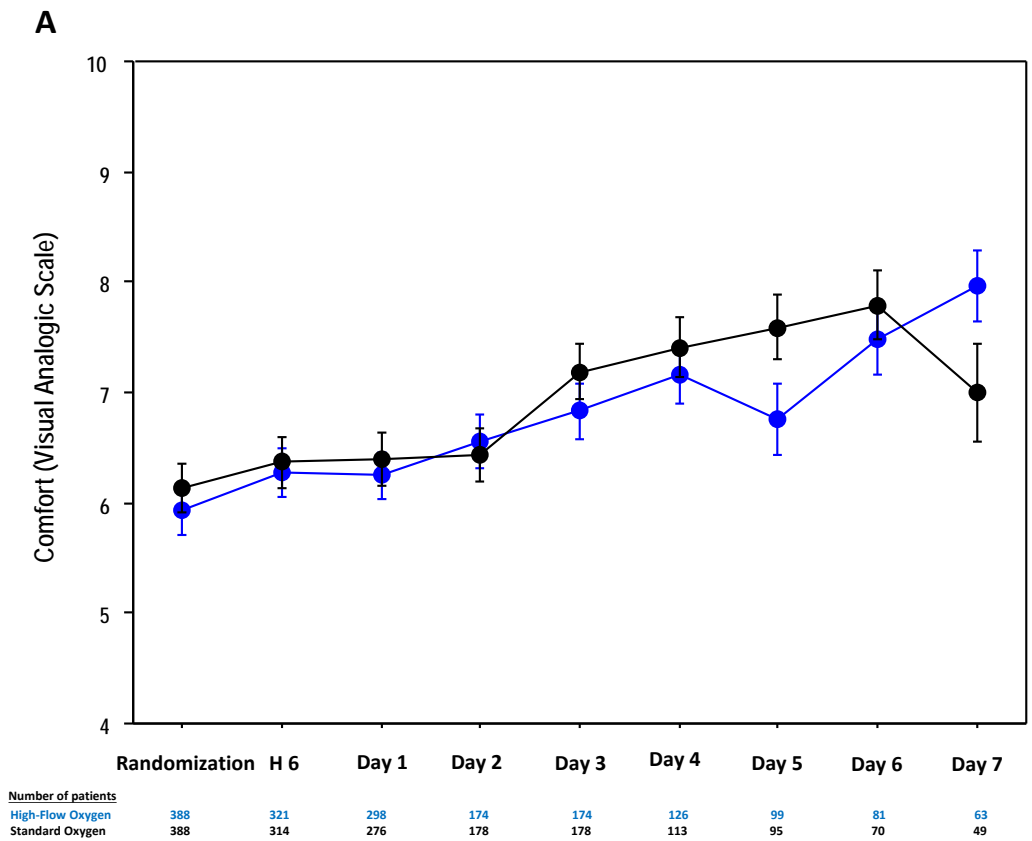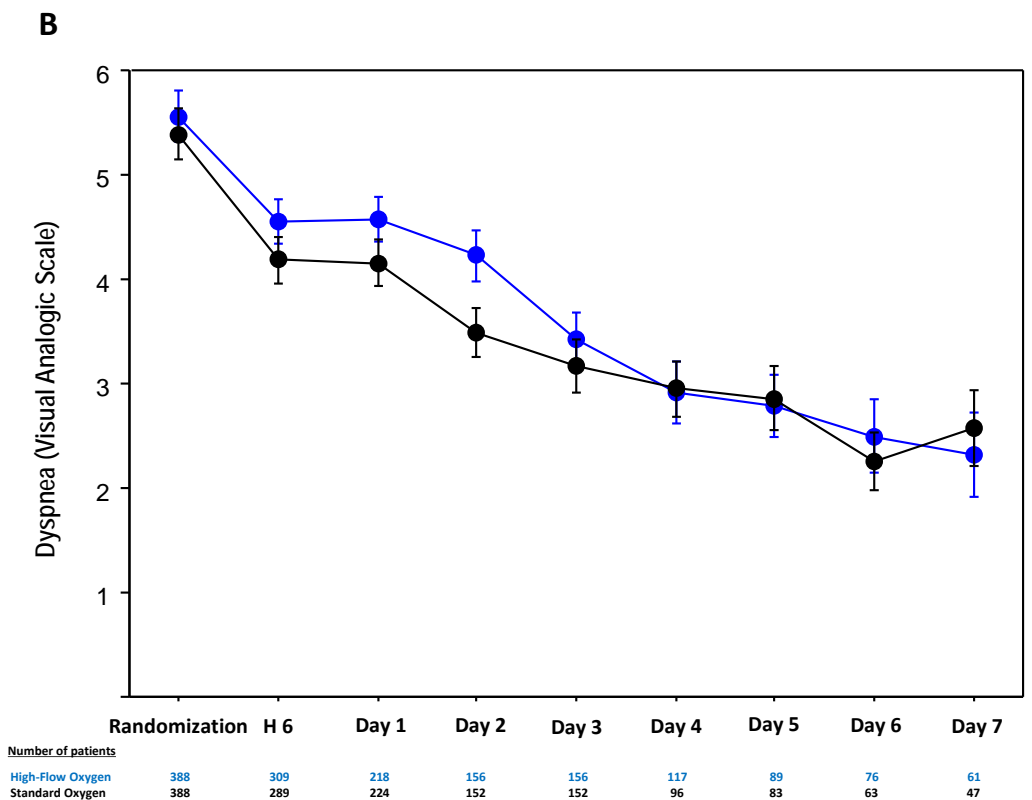

Supplement: jama-320-2099-s002.pdf [file jama-320-2099-s002.pdf]
