# Supplementary material
Source: PubMed Central journal article supplement (PMC6583581)
Supplement: jama-320-2099-s001.pdf [file jama-320-2099-s001.pdf]

1 **This is the supplement for the manuscript entitled “Oxygenation Strategy in**  
2 **Immunocompromised Patients with Acute Respiratory Failure” submitted to JAMA.**

3

4 **This supplement contains the following items**

5 **1. Pages 2-69: Copies of the study’s initial protocol,**

6 **2. Pages 70-81: Final protocol**

7 **3. No amendment was performed on the protocol. The only request to the IRB was**  
8 **to add new centres to the study.**

9 **4. Page 82-83: Copies of the original statistical analysis plan,**

10 **5. Pages 84-127: Final statistical analysis plan as published in TRIALS**

11 **6. No amendment was performed on the statistical analysis plan**

12

13

14 **INITIAL PROTOCOL (Submitted to the grant application)**

15 **A Randomised Controlled Non-Inferiority Trial of High-Flow Nasal Oxygen versus Usual**  
16 **Oxygen Therapy in Critically Ill Immunocompromised Patients**

17

18 **Oxygène à haut débit humidifié chez les patients immunodéprimés en insuffisance**  
19 **respiratoire aigüe : un essai randomisé contrôlé**

20

21 **Élie Azoulay, Alexandre Demoule and Virginie Lemiale, on behalf of the Groupe de Recherche**  
22 **Respiratoire en Réanimation Onco-Hématologique**

23

24 **This project was prepared for submission to the 2015 PHRC N 15 -15 reviewing process.**

25

26 **Corresponding author**

27 Professor **Élie AZOULAY**, AP-HP, Hôpital Saint-Louis, Service de Réanimation Médicale;  
28 Université Paris-Diderot, Sorbonne Paris-Cité, Faculté de médecine; 1 avenue Claude  
29 Vellefaux; 75010 Paris, FRANCE

30 Tel: +33 142 499 421 Fax: +33 142 499 426

31 E-mail: [elie.azoulay@sls.aphp.fr](mailto:elie.azoulay@sls.aphp.fr)

32

33 **Institution responsible for managing the funds allocated to the study:** Saint-Louis Hospital,

34 Paris

35

36 **Research Domain:**

37 Internal medicine, organ transplant, infectious diseases, malignancies, respiratory care

38

39 **Name of the methodologist:**

40 Prof. Sylvie Chevret, SBIM Saint-Louis, Tel.: +33 142 499 742

41 [sylvie.chevret@paris7.jussieu.fr](mailto:sylvie.chevret@paris7.jussieu.fr)

42

43 **Organisation responsible for project management:**

44 SBIM Saint-Louis

45

46 **Organisation responsible for quality assurance:**

47 Saint-Louis Hospital, Paris

48

49 **Organisation responsible for data management and statistics:**

50 SBIM Saint-Louis

51

52 **Anticipated number of recruiting centres:** 26

53

| <b>CONTENT</b>                                                                                                                                     | <b>Page</b> |
|----------------------------------------------------------------------------------------------------------------------------------------------------|-------------|
| <b>1. Abstract and Résumé</b>                                                                                                                      | <b>5</b>    |
| <b>2. Background</b>                                                                                                                               | <b>8</b>    |
| <b>3. Drawbacks associated with standard oxygen therapy</b>                                                                                        | <b>13</b>   |
| <b>4. Physiological effect of HFNO</b>                                                                                                             | <b>15</b>   |
| <b>5. Clinical trials in adults with hypoxemic respiratory failure</b>                                                                             | <b>19</b>   |
| <b>6. Strengths and weaknesses of published data on HFNO</b>                                                                                       | <b>24</b>   |
| <b>7. HFNO in immunocompromised patients</b>                                                                                                       | <b>26</b>   |
| <b>8. Preliminary results from our study group</b>                                                                                                 | <b>28</b>   |
| <b>9. What is the standard of care for providing oxygen to immunocompromised patients? NIV is not superior over low/medium flow oxygen therapy</b> | <b>30</b>   |
| <b>10. Participating centres: the <i>Groupe de Recherche Respiratoire en Réanimation Onco-Hématologique</i> (GRRR-OH)</b>                          | <b>32</b>   |
| <b>11. Study objective and major hypothesis</b>                                                                                                    | <b>35</b>   |
| <b>12. Methods: non-inferiority randomised active-control design</b>                                                                               | <b>36</b>   |
| A. INCLUSION CRITERIA                                                                                                                              |             |
| B. EXCLUSION CRITERIA                                                                                                                              |             |
| C. DESCRIPTION OF THE INTERVENTION                                                                                                                 |             |
| D. ENDPOINTS                                                                                                                                       |             |
| E. POSSIBLE DIFFICULTIES, UNWANTED EFFECTS, AND SAFETY ISSUES                                                                                      |             |
| <b>13. Hypotheses and expected changes based on the study results</b>                                                                              | <b>44</b>   |
| <b>14. Practical aspects: randomisation</b>                                                                                                        | <b>45</b>   |
| <b>15. Number of patients to include in the study (sample size)</b>                                                                                | <b>46</b>   |
| <b>16. Statistical analysis</b>                                                                                                                    | <b>47</b>   |
| A. MINIMISING BIASES                                                                                                                               |             |
| B. TYPE OF COMPARISONS                                                                                                                             |             |
| C. INTERIM ANALYSES                                                                                                                                |             |
| D. PRE-SPECIFICATION OF ANALYSES                                                                                                                   |             |
| 1. ANALYSIS SETS                                                                                                                                   |             |
| 2. MISSING VALUES AND OUTLIERS                                                                                                                     |             |
| 3. STATISTICAL ANALYSIS STRATEGY                                                                                                                   |             |
| <b>17. Ethical issues, administrative aspects, and collected data (electronic case-report form, eCRF)</b>                                          | <b>50</b>   |
| <b>18. Ethical and safety issues</b>                                                                                                               | <b>53</b>   |
| A. DATA COLLECTION                                                                                                                                 |             |
| B. INVESTIGATOR RESPONSIBILITIES                                                                                                                   |             |
| C. MONITORING AND DATA QUALITY ASSURANCE                                                                                                           |             |
| D. APPROVAL BY THE ETHICS COMMITTEE AND REGULATORY AGENCIES                                                                                        |             |
| E. RIGHT TO ACCESS THE DATABASE                                                                                                                    |             |
| <b>19. References</b>                                                                                                                              | <b>56</b>   |
| <b>20. Appendices</b>                                                                                                                              | <b>66</b>   |

55  
56  
57

**Investigator, Sponsor, and Clinical Research and Data Centre**

|                                                                                                                                                                                                                                                                                                                                                       |                                                                                                                                                                                                                                                                                                                                                                                                           |
|-------------------------------------------------------------------------------------------------------------------------------------------------------------------------------------------------------------------------------------------------------------------------------------------------------------------------------------------------------|-----------------------------------------------------------------------------------------------------------------------------------------------------------------------------------------------------------------------------------------------------------------------------------------------------------------------------------------------------------------------------------------------------------|
| <b>Principal Investigator (PI)</b><br><br>Prof. Elie Azoulay<br>Service de Réanimation Médicale<br>Hôpital Saint Louis, Paris, FRANCE<br><b>Office phone:</b> +33 (0) 1 42 49 34 21<br><b>Fax:</b> +33 (0) 1 42 49 94 26<br><b>E-mail:</b> <a href="mailto:elie.azoulay@sls.aphp.fr">elie.azoulay@sls.aphp.fr</a>                                     |                                                                                                                                                                                                                                                                                                                                                                                                           |
| <b>Sponsor</b><br>Assistance Publique – Hôpitaux de<br>Paris (AP- HP)<br>Direction de la Politique Médicale<br>Département de la Recherche<br>Clinique et du Développement<br><br><b>DRCD - Hôpital Saint Louis</b><br>1, avenue Claude Vellefaux - 75010<br>Paris, FRANCE<br><b>Tel.:</b> +33 (0) 1 44 84 17 48<br><b>Fax:</b> +33 (0) 1 44 84 17 01 | <b>Clinical Research and Data Centre</b><br><b>URC du GH Saint Louis-Lariboisière</b><br><br>Professor Sylvie CHEVRET<br>URC du GH Saint Louis Lariboisière<br>Site Saint Louis<br>1, avenue Claude Vellefaux - 75010<br>Paris, FRANCE<br>Tel.: +33 (0) 1 42 49 97 42<br>Fax: +33 (0) 1 42 49 97 45<br><br>E-mail: <a href="mailto:sylvie.chevret@paris7.jussieu.fr">sylvie.chevret@paris7.jussieu.fr</a> |

58  
59

## 1. Abstract

**Background:** Acute respiratory failure (ARF) is the leading reason for ICU admission in immunocompromised patients. Usual oxygen therapy involves administering low-to-medium oxygen flows through a nasal cannula or mask [with or without a bag and with or without the Venturi system] to achieve  $SpO_2 \geq 95\%$ . Based on a landmark trial by Hilbert et al. published in 2001, oxygen therapy is usually combined with non-invasive ventilation [NIV] providing both end-expiratory positive pressure and pressure support. However, in a recent trial by our group (in press), NIV was not superior over oxygen without NIV. High-flow nasal oxygen [HFNO] therapy is a focus of growing attention as an alternative to usual oxygen therapy. By providing warmed and humidified gas, HFNO allows the delivery of higher flow rates [of up to 60 L/min] via nasal cannula devices, with  $FiO_2$  values of nearly 100%. Physiological benefits of HFNO consist of higher and constant  $FiO_2$  values, decreased work of breathing, nasopharyngeal washout leading to improved breathing-effort efficiency, and higher positive airway pressures associated with better lung recruitment. Clinical consequences of these physiological benefits include alleviation of dyspnoea and discomfort, decreases in tachypnoea and signs of respiratory distress, a diminished need for intubation in patients with severe hypoxemia, and decreased mortality in unselected patients with acute hypoxemic respiratory failure. However, although preliminary data establish the feasibility and safety of this technique, HFNO has never been properly evaluated in immunocompromised patients.

**Hypothesis:** HFNO is not inferior to the usual care [low/medium-flow oxygen and/or NIV] in minimising day-28 mortality.

**Design:** Randomised multicentre (26 centres) open-label controlled non-inferiority trial.

**Intervention:** Continuous HFNO only vs. usual care [low/medium-flow oxygen and/or NIV]

**Inclusion criteria:** Only patients meeting all five of the following criteria can be included: **1)** adult; **2)** known immunosuppression defined as any of the following: a) immunosuppressive drugs/long-term [ $>3$  months] or high-dose [ $>0.5$  mg/kg/day] steroids; b) solid organ transplant; c) solid tumour; d) haematological malignancy; e) HIV infection; **3)** ICU admission for any reason; **4)** oxygen therapy indicated by any of the following: a) respiratory distress with tachypnoea [respiratory rate  $>30$ /min]; b) cyanosis; c) laboured breathing; d)  $SpO_2 < 90\%$ ; e) anticipated respiratory deterioration (procedure), **5)** written informed consent from the patient or next of kin. Patients with do-not-intubate orders [DNI] are eligible.

**Exclusion criteria:** Only patients meeting none of the following criteria can be included: **1)** patient expected, at ICU admission, to die in the ICU; **2)** patient or next of kin having refused study participation; **3)** hypercapnia [which requires NIV, according to current guidelines], **4)** isolated cardiogenic pulmonary oedema [which requires NIV, according to current guidelines], **5)** pregnancy or breastfeeding, **6)** anatomical factors precluding insertion of a nasal cannula; and **7)** no coverage by the French statutory healthcare insurance system.

**Primary endpoint:** all-cause mortality 28 days after ICU admission

**Secondary endpoints:** intubation rate, comfort, dyspnoea, respiratory rate, oxygenation, ICU length of stay, ICU-acquired infections, time to resolution of pulmonary infiltrates, oxygen-free survival, ventilation-free survival, re-intubation, lowest median  $SpO_2$  while intubated, mortality after HFNO failure, patient satisfaction, and physician satisfaction

**Sample size estimation:** Based on an expected 26% mortality rate in the control group, and using a 9% non-inferiority margin, error rate set at 5% and a statistical power at 80%, 408 patients are required in each treatment group [816 patients overall].

**Participating centres:** 26 centres belonging our study group.

**Randomisation:** randomised controlled open-label trial (patient as the unit of randomisation).

**Study period:** 30 months, i.e., 24 months for patient recruitment with 6 months of additional follow-up.

109 **1.bis. Résumé**

110 **Introduction:** L'insuffisance respiratoire aiguë est la première cause d'admission en réanimation chez  
111 les patients immunodéprimés (Idp). L'oxygène (O2) habituellement apporté est de faible à moyen débit,  
112 délivré par une sonde nasale ou un masque (avec ou sans réservoir ou système Venturi), avec pour  
113 objectif de restaurer une SpO2 ≥ 95%. Depuis l'étude de Hilbert, l'O2 est souvent associé à la ventilation  
114 non invasive (VNI) apportant aide inspiratoire et pression positive télé-expiratoire. Cependant, un essai  
115 récent de notre groupe n'a pas confirmé que la VNI était supérieure à l'O2.

116 L'oxygène à haut débit humidifié (HFNO) suscite un intérêt croissant et pourrait devenir une alternative  
117 à l'O2 classique. En effet, le gaz réchauffé et humidifié permet de délivrer jusqu'à 60 L/min de débit  
118 au travers d'une sonde nasale, avec une pression partielle en O2 (FiO2) proche de 100%. Les effets  
119 physiologiques de l'HFNO consistent en l'apport de FiO2 élevées et constantes, une diminution du  
120 travail respiratoire, un rinçage de l'espace mort nasopharyngé, et des pressions positives dans les voies  
121 aériennes, permettant un meilleur recrutement alvéolaire. Les conséquences cliniques de ces effets  
122 comprennent une diminution de la dyspnée, de la tachypnée, des signes de détresse respiratoire, de  
123 l'inconfort, du recours à l'intubation chez les patients les plus hypoxémiques et d'une diminution de la  
124 mortalité. Néanmoins, l'HFNO n'a jamais été évaluée chez les patients Idp, où elle a été démontée  
125 comme faisable et sans effet néfaste.

126 **Hypothèse :** L'HFNO n'est pas inférieure à la prise en charge habituelle (O2 de faible ou moyen débit  
127 avec ou sans VNI) concernant la mortalité à J28.

128 **Schéma de l'étude :** Essai randomisé contrôlé ouvert de non-infériorité dans 26 services de réanimation.

129 **Intervention :** HFNO continue vs. Traitement habituel (O2 de faible/moyen débit avec ou sans VNI)

130 **Critères d'inclusion :** **1)** patients adultes ; **2)** Idp connue à type de a) traitements immunosuppresseurs  
131 au long cours (>3mois) ou stéroïdes à forte dose (>0.5 mg/kg/j) ; b) greffe d'organe solide ; c) tumeur  
132 solide ; d) hémopathie maligne ; e) infection HIV ; **3)** admission en réanimation quel que soit le motif ;  
133 **4)** nécessité d'une oxygénothérapie pour a) tachypnée >30/min ; b) cyanose ; c) tirage respiratoire ; d)  
134 SpO2 < 90% ; e) anticipation d'une aggravation respiratoire (procédure) ; **5)** consentement éclairé par le  
135 patient ou ses proches. Les patients avec décision de ne pas intuber sont éligibles pour cet essai.

136 **Critères d'exclusion :** **1)** patient moribond ; **2)** refus de participer à l'étude par le patient ou ses proches ;  
137 **3)** hypercapnia (VNI indiquée selon les recommandations en vigueur) ; **4)** œdème pulmonaire  
138 cardiogénique isolé (VNI indiquée selon les recommandations en vigueur) ; **5)** grossesse ou allaitement ;  
139 **6)** barrières anatomiques à l'administration d'une sonde nasale ; **7)** absence de couverture par la sécurité  
140 sociale.

141 **Critère de jugement principale :** mortalité 28 jours après la randomisation.

142 **Critères de jugement secondaires :** recours à l'intubation, confort, score de dyspnée, oxygénation,  
143 durée de séjour en réanimation, infections associées aux soins, délai de résolution des infiltrats  
144 pulmonaires, nombre de jours vivants sans oxygène et sans ventilation à J28, ré-intubation (HFNO post-  
145 extubation), saturation la plus basse pendant l'intubation (HFNO per intubation), mortalité après  
146 intubation, et satisfaction des patients et des soignants.

147 **Nombre de sujets nécessaires :** attendue une mortalité de 26% dans le bras témoin, et en utilisant une  
148 marge de non infériorité de 9%, avec  $\alpha = 5\%$  et  $\beta = 20\%$  (puissance = 80%), 408 patients sont à inclure  
149 dans chaque groupe (816 au total).

150 **Centres participants :** 26 services de réanimation affiliés au Grrr-OH.

151 **Randomisation :** essai randomisé contrôlé ouvert

152 **Durée de l'étude :** 30 mois (24 mois de recrutement et 6 mois de suivi).

153

154      **KEY WORDS**

155      Oxygen

156      Acute respiratory failure

157      Immunosuppression

158      Critical care

159      Non-invasive

160      Transplantation

161

162      **Previous grants [in the frame of DGOS calls] obtained by Elie Azoulay**

163      2001: PHRC Famirea [NEJM 2007]

164      2005: PHRC MiniMax [CCM 2008, AJRCCM 2009]

165      2008: PHRC oVNI [ICM 2012, Lancet Oncol 2013]

166      2009: PHRC Trial-OH [JCO 2013]

167



168 **2.Background**

169 Acute respiratory failure [ARF] is the leading reason for ICU admission of  
170 immunocompromised patients.<sup>1-6</sup> Mortality has decreased dramatically in this population in  
171 recent years, for several reasons. Management strategies for the underlying conditions have  
172 benefited from a number of innovations such as steroid-sparing agents, watch-and-wait  
173 approaches, and targeted therapies.<sup>7, 8</sup> Early ICU admission to permit the use of non-invasive  
174 diagnostic and therapeutic strategies has increased survival.<sup>1, 9-11</sup> Finally, the optimal use of  
175 non-invasive ventilation [NIV] and the introduction of other oxygenation strategies have  
176 improved the management of respiratory dysfunction [Table 1].

177 Oxygen therapy is the first-line treatment in hypoxemic patients. Oxygen can be delivered  
178 using low-flow devices (up to 15 L/min) such as nasal cannulas, non-rebreathing masks, and  
179 bag valve masks [Figure 1]. The fraction of inspired oxygen [FiO<sub>2</sub>] obtained using these devices  
180 varies with the patient's breathing pattern, peak inspiratory flow rate, delivery system, and mask  
181 characteristics. Maximum flow rates are limited in part by the inability of these devices to heat  
182 and humidify gas at high flows. With conventional medium-flow systems, such as Venturi  
183 masks, pressurized oxygen is forced through a small orifice at a constant flow, and this draws  
184 in room air through entrainment ports, at a set air/oxygen ratio. Although, compared to  
185 conventional nasal systems the FiO<sub>2</sub> value thus obtained is more stable, tolerance is poorer, as  
186 the mask is cumbersome and the inspired gas may be inadequately heated and humidified. Also,  
187 if the patient has a high inspiratory flow rate, the amount of entrained room air is large and  
188 dilutes the oxygen, thereby lowering the FiO<sub>2</sub>. Twenty years ago, Dewan and Bell described  
189 their experience with 'high flow rates' delivered using a regular nasal cannula in patients with  
190 chronic obstructive pulmonary disease.<sup>12</sup>

191

**Table 1: Definitions for oxygen delivery devices and reported outcomes using HFNO**

| <b>Definitions</b>                       |                                                                                                                                                                                                                                                                                                                                                                                                                                                                                                                                                                                   |
|------------------------------------------|-----------------------------------------------------------------------------------------------------------------------------------------------------------------------------------------------------------------------------------------------------------------------------------------------------------------------------------------------------------------------------------------------------------------------------------------------------------------------------------------------------------------------------------------------------------------------------------|
| HFNO                                     | Device that delivers humidified and warmed high-flow oxygen at flows greater than 15 L/min.                                                                                                                                                                                                                                                                                                                                                                                                                                                                                       |
| Usual oxygen therapy devices             | Devices used to treat spontaneously ventilating patients in the ICU who require supplemental oxygen. They deliver either <ul style="list-style-type: none"> <li>- low-flow oxygen [including nasal cannula, Ventimask® without Venturi effect, and non-rebreather mask]</li> <li>- or medium-flow oxygen [Venturi masks and medium-flow facemasks]</li> </ul>                                                                                                                                                                                                                     |
| Non-invasive ventilation (NIV)           | Administration of ventilatory support without using an endotracheal tube or tracheostomy tube. Ventilatory support can be provided through diverse interfaces (mouthpiece, nasal mask, facemask, or helmet), using a variety of ventilatory modes (e.g., volume ventilation, pressure support, bi-level positive airway pressure [BiPAP; see the image below], proportional-assist ventilation [PAV], and continuous positive airway pressure [CPAP]) with either dedicated NIV ventilators or ventilators also capable of providing support through an endotracheal tube or mask |
| <b>Clinical outcomes in HFNO studies</b> | <b>Assessed by measuring</b>                                                                                                                                                                                                                                                                                                                                                                                                                                                                                                                                                      |
| Oxygenation<br>[desaturation]            | Continuous SpO <sub>2</sub><br>PaO <sub>2</sub> at fixed times<br>PaO <sub>2</sub> /FiO <sub>2</sub> ratio                                                                                                                                                                                                                                                                                                                                                                                                                                                                        |
| Ventilation                              | PaCO <sub>2</sub>                                                                                                                                                                                                                                                                                                                                                                                                                                                                                                                                                                 |
| Airway pressures                         | Nasopharyngeal or hypopharyngeal catheter                                                                                                                                                                                                                                                                                                                                                                                                                                                                                                                                         |
| Work of breathing                        | Respiratory rate                                                                                                                                                                                                                                                                                                                                                                                                                                                                                                                                                                  |
| Patient comfort and adherence            | Visual analogue scale [VAS] for breathing difficulties<br>Satisfaction and tolerance<br>Global comfort<br>Dyspnoea [VAS or Borg scale], dry mouth                                                                                                                                                                                                                                                                                                                                                                                                                                 |
| Cardiovascular status                    | Heart rate<br>Shock<br>Need for vasopressors                                                                                                                                                                                                                                                                                                                                                                                                                                                                                                                                      |
| Complications                            | Need for NIV<br>Need for intubation and mechanical ventilation [MV]<br>Mortality                                                                                                                                                                                                                                                                                                                                                                                                                                                                                                  |

195 **Figure 1: Low-flow and high-flow oxygen delivery devices**  
196

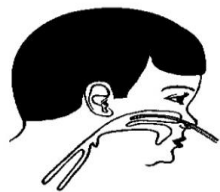

**Low-flow nasal catheter**

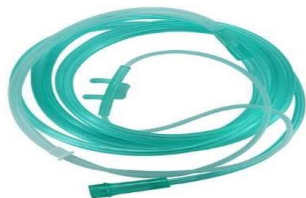

**Low-flow nasal cannula**

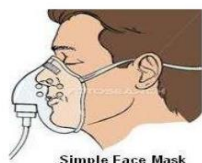

**Simple Face Mask**

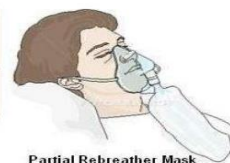

**Partial Rebreather Mask**

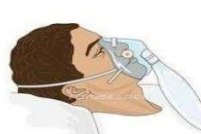

**Non Rebreather Mask**

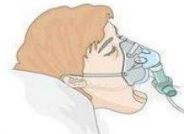

**Venturi Mask**

**Low-flow and medium-flow masks**

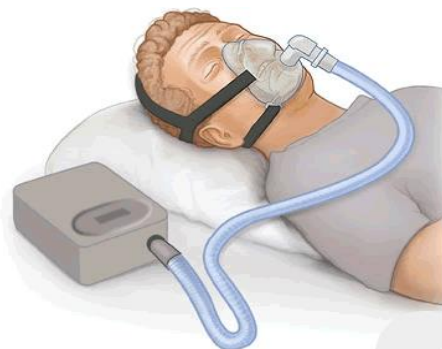

**Non-invasive ventilation**

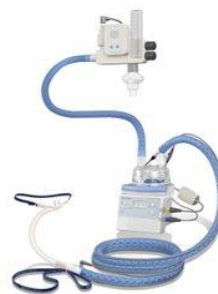

**High-flow nasal cannula**

197

198

199

200

201 Over the past two decades, devices that deliver heated and humidified oxygen at high  
202 flows through a nasal cannula were developed as an alternative to low/medium flow devices.  
203 High-flow nasal oxygen [HFNO] delivers oxygen flow rates of up to 60 L/min. An air/oxygen  
204 blender is connected via an active heated humidifier to a nasal cannula and allows FiO<sub>2</sub>  
205 adjustment independently from the flow rate [Figure 2]. Compared to other devices, HFNO  
206 provides a number of physiological benefits including greater comfort and tolerance; more  
207 effective oxygenation under some circumstances; and breathing pattern improvements with an  
208 increase in tidal volume and decreases in respiratory rate and dyspnoea. These benefits are  
209 broadening the indications of HFNO, which has now been evaluated and used to treat  
210 hypoxemic respiratory failure and cardiogenic pulmonary oedema, to improve oxygenation for  
211 pre-intubation, and to treat patients after surgery or after extubation. HFNO has been used both  
212 to prevent pulmonary complications and to treat established respiratory failure. Moreover,  
213 recent high-quality randomised controlled trials have confirmed previous preliminary  
214 results.<sup>13,14</sup> Nevertheless, controlled studies in specific patient populations, such as  
215 immunocompromised patients, are needed to confirm that HFNO is clinically superior over  
216 other methods, to evaluate effects on survival, and to determine the optimal indications of  
217 HFNO compared to other modalities such as standard oxygen therapy and NIV.

218

219 **Figure 2: High-flow nasal oxygen [HFNO] device. An air/oxygen blender, allowing  $FiO_2$  values ranging**  
220 **from 0.21 to 1.0, generates flow rates of up to 60 L/min. The gas is heated and humidified by an**  
221 **active heated humidifier and delivered via a single limb.**

222

223

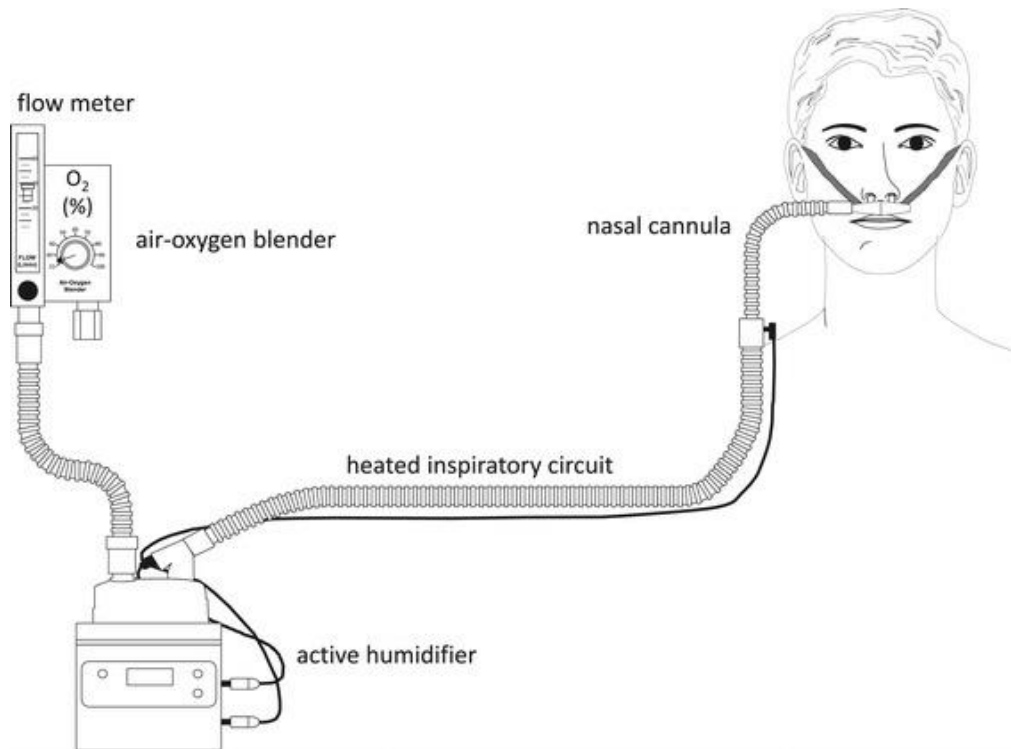

224

225

226

227 **3. Drawbacks associated with usual oxygen therapy**

228 Low/medium-flow oxygen is the first-line treatment for hypoxemic patients and is  
229 generally provided via a face mask or nasal cannula. These delivery devices have several  
230 drawbacks that limit the efficacy and tolerance of the oxygen therapy (Table 2). Low-flow  
231 oxygen is usually not humidified and therefore often causes distressing symptoms such as dry  
232 nose, dry throat, and nasal pain. Bubble humidifiers are often used to humidify gas delivered to  
233 spontaneously breathing patients but fails to eliminate all discomfort when absolute humidity  
234 is low.<sup>15,16</sup> In addition to insufficient humidification, insufficient warming of the inspired gas  
235 causes patient discomfort. Symptom severity increases with flow. Thus, oxygen cannot be  
236 delivered at flows greater than 15 L/min. However, in patients with respiratory failure,  
237 inspiratory flows vary widely and are considerably higher, between 30 and more than 100  
238 L/min. As a result FiO<sub>2</sub> values are variable and often lower than needed.

239

240 **Table 2: Drawbacks of standard oxygen therapy that limit the effectiveness and**  
241 **tolerance of oxygen delivery**

|                                                                                                                                                                                                                                                                                                                                                                   |
|-------------------------------------------------------------------------------------------------------------------------------------------------------------------------------------------------------------------------------------------------------------------------------------------------------------------------------------------------------------------|
| <p><b>Oxygen is not humidified at low flow</b></p> <ul style="list-style-type: none"><li>- dry nose</li><li>- dry throat</li><li>- dry mouth</li><li>- nasal pain</li><li>- ocular irritation,</li><li>- nasal and ocular trauma</li><li>- discomfort related to the mask</li><li>- gastric distension</li><li>- aspiration</li><li>- global discomfort</li></ul> |
| <p><b>Insufficient heating leads to poor tolerance of oxygen therapy</b></p>                                                                                                                                                                                                                                                                                      |
| <p><b>Unwarmed and dry gas may cause bronchoconstriction and may decrease pulmonary compliance and conductance.</b></p>                                                                                                                                                                                                                                           |
| <p><b>With low/medium-flow devices, oxygen cannot be delivered at flows greater than 15 L/min, whereas inspiratory flow in patients with respiratory failure varies widely and is considerably higher, between 30 and more than 100 L/min.</b></p>                                                                                                                |
| <p><b>Given the difference between the patient's inspiratory flow and the delivered flow, FiO<sub>2</sub> is both variable and often lower than needed.</b></p>                                                                                                                                                                                                   |

242

#### 243 **4. Physiological effects of HFNO**

244 HFNO may have several advantages over low/medium-flow oxygen delivery systems,  
245 resulting in better physiological effects. The mechanisms through which HFNO devices affect  
246 the respiratory system and alter gas exchanges are still under investigation, but a growing body  
247 of evidence supports those outlined below [Table 3].

##### 248 *1/ HFNO delivers higher and more stable FiO<sub>2</sub> values*

249 In healthy volunteers, HFNO with flow rates >15 L/min produced higher FiO<sub>2</sub> values  
250 [measured using a nasal catheter placed behind the uvula] to the alveoli, compared to a low-  
251 flow nasal cannula.<sup>17</sup> HFNO maintains high FiO<sub>2</sub> values by delivering flow rates higher than  
252 the spontaneous inspiratory demand, thereby diminishing room-air entrainment, which occurs  
253 commonly with standard nasal cannulas and face masks. Among all other oxygen delivery  
254 devices, only the Venturi mask at its maximum flow rate can deliver stable FiO<sub>2</sub> values across  
255 a wide range of respiratory rates.<sup>18</sup> As the difference between the patients' inspiratory flow and  
256 the delivered flow is small with HFNO, FiO<sub>2</sub> remains relatively stable. However, the flow rate  
257 must be set to match the patient's inspiratory demand and/or the severity of respiratory distress.

##### 258 *2/ HFNO washes out the nasopharyngeal dead space*

259 This effect has several benefits.

260- It increases the fraction of minute ventilation that penetrates into the alveoli and participates in  
261 gas exchange.<sup>12</sup> However, this effect reaches a plateau above a threshold flow rate  
262 corresponding to complete washout of the nasopharyngeal dead space.

263- It improves respiratory efficiency.<sup>19</sup>

264- It improves thoraco-abdominal synchrony. In a study that used respiratory inductance  
265 plethysmography, thoraco-abdominal synchrony was better with HFNO than with facemask  
266 oxygen therapy.<sup>20</sup> Furthermore, HFNO was associated with a lower respiratory rates and similar



267 tidal volume [VT], indicating a decrease in minute ventilation; as well as with a similar PaCO<sub>2</sub>  
268 value, suggesting that alveolar ventilation was unchanged. Lower respiratory rates with HFNO  
269 than with low-flow oxygen have also been documented in clinical studies.<sup>21-23</sup>

270 *3/ HFNO decreases the work of breathing*

271 HFNO decreases the work of breathing by mechanically stenting the airway.<sup>24</sup> Also, the  
272 high flow of oxygen matches the patient's inspiratory flow and markedly decreases the  
273 inspiratory resistance associated with the nasopharynx and, therefore, the attendant work of  
274 breathing. This change in resistance that translates into a decrease in the resistive work of  
275 breathing is as efficient as nasal continuous positive airway pressure [CPAP] set at 6  
276 cmH<sub>2</sub>O.<sup>12,25</sup>

277 *4/ HFNO provides warm humidified gas*

278 Low/medium-flow oxygen devices delivering dry and unwarmed gas are associated with  
279 mask discomfort, nasal and oral dryness, ocular irritation, nasal and ocular trauma, gastric  
280 distension, and aspiration.<sup>15,16</sup> Unwarmed and dry gas may cause bronchoconstriction and  
281 decreases in pulmonary compliance and conductance.<sup>26,27</sup> The provision by HFNO of  
282 adequately warmed and humidified gas to the conducting airways improves conductance and  
283 pulmonary compliance compared to dry, cooler gas.<sup>31,32</sup> In a bench study, two HFNO devices  
284 delivered adequately warmed and humidified gas at flows of 40 L/min or more, regardless of  
285 VT and minute volume.<sup>28</sup>

286 The delivery of warm humidified gas reduces the work of breathing and improves  
287 mucociliary function, thus facilitating secretion clearance, decreasing the risk of atelectasis, and  
288 producing a good ventilation/perfusion ratio and better oxygenation.<sup>29</sup>

289 Under normal conditions, the nasal passages warm and humidify the inspired air to 37°C  
290 and 100% of relative humidity.<sup>30</sup> Therefore, by warming and humidifying the inspired gas,  
291 HFNO probably decreases energy costs.

#### 292 *5/ HFNO increases positive airway pressures*

293 HFNO has been shown to increase positive airway pressures in studies involving  
294 measurements of nasal pharyngeal pressure, oral cavity pressure, end-expiratory oesophageal  
295 pressure, and tracheal pressure.<sup>33,34</sup> High flow through the nasopharynx can be titrated to  
296 produce a positive distending pressure, thereby improving lung recruitment and decreasing the  
297 ventilation-perfusion mismatch in the lungs. Nasal cannula size is a critical determinant of  
298 CPAP generation, as the positive pressure level depends in part on air leakage around the  
299 cannula prongs.<sup>35</sup> Typically, the nasal cannula can generate positive pressure levels of up to 8  
300 cm H<sub>2</sub>O in the pharynx.<sup>36</sup> Airway pressure is significantly higher when breathing with the  
301 mouth closed than with the mouth open. In healthy adults, inspiratory and expiratory pharyngeal  
302 pressures were linearly related when flow rates were increased to 60 L/min.<sup>33</sup> In a study of  
303 patients after heart surgery, HFNO at 35 L/min delivered low levels of positive airway  
304 pressure.<sup>34</sup> The importance of minimising leaks around the nares has been demonstrated.<sup>37</sup>

305 Although the positive end-expiratory pressure [PEEP] generated by HFNO is relatively  
306 low compared to that seen with closed systems, it can increase the lung volume and recruit  
307 collapsed alveoli.<sup>17,34,36,38</sup> A study involving electrical lung impedance tomography in patients  
308 after heart surgery documented larger end-expiratory lung volumes with HFNO than with low-  
309 flow oxygen therapy.<sup>21</sup> In healthy adults, the same measurement method showed that HFNO  
310 increased the end-expiratory lung volume in the prone and supine positions, compared to  
311 breathing ambient air.<sup>38</sup>

312

|                                                                                                                                                                                                                                                                                                                                                                                                                                                                                                                                                                                                                                                                            |
|----------------------------------------------------------------------------------------------------------------------------------------------------------------------------------------------------------------------------------------------------------------------------------------------------------------------------------------------------------------------------------------------------------------------------------------------------------------------------------------------------------------------------------------------------------------------------------------------------------------------------------------------------------------------------|
| <p><b><i>FiO<sub>2</sub> values are higher and more stable</i></b><br/>                 because the delivered flow rate is higher than the spontaneous inspiratory demand and because the difference between the delivered flow rate and the patient’s inspiratory flow rate is smaller.<br/>                 ☞ The flow rate must be set to match the patient’s inspiratory demand and/or the severity of the respiratory distress.</p>                                                                                                                                                                                                                                   |
| <p><b><i>The anatomical dead space is decreased, via washout of the nasopharyngeal space</i></b><br/>                 Consequently, a larger fraction of the minute ventilation reaches the alveoli, where it can participate in gas exchange.<br/>                 Respiratory efforts become more efficient.<br/>                 Thoraco-abdominal synchrony improves.</p>                                                                                                                                                                                                                                                                                              |
| <p><b><i>The work of breathing is decreased</i></b><br/>                 because HFNO mechanically stents the airway, provides flow rates that match the patient’s inspiratory flow, and markedly attenuates the inspiratory resistance associated with the nasopharynx, thereby eliminating the attendant work of breathing.</p>                                                                                                                                                                                                                                                                                                                                          |
| <p><b><i>The gas delivered is heated and humidified</i></b><br/>                 Warm humid gas reduces the work of breathing and improves muco-ciliary function, thereby facilitating secretion clearance, decreasing the risk of atelectasis, and improving the ventilation/perfusion ratio and oxygenation.<br/>                 The body is spared the energy cost of warming and humidifying the inspired gas.<br/>                 Warm humid gas is associated with better conductance and pulmonary compliance compared to dry, cooler gas.<br/>                 ☞ HFNO delivers adequately warmed and humidified gas only when the flow rate is &gt;40 L/min.</p> |
| <p><b><i>Positive airway pressures are increased</i></b><br/>                 The nasal cannula generates continuous positive pressures in the pharynx of up to 8 cm H<sub>2</sub>O. The positive pressure distends the lungs, ensuring lung recruitment and decreasing the ventilation-perfusion mismatch in the lungs.<br/>                 End-expiratory lung volume is greater with HFNO than with low-flow oxygen therapy.<br/>                 ☞ Minimising leaks around the cannula prongs is of the utmost importance.</p>                                                                                                                                        |

## 316 **5. Clinical trials in adults with hypoxemic respiratory failure**

317 We searched for publications and abstracts in PubMed, Embase, and the Cochrane  
318 Database of Systematic Reviews using the MeSH headings ‘oxygen inhalation therapy’ OR  
319 ‘positive pressure respiration’ AND the text words ‘high flow nasal’ OR ‘nasal cannula’ OR  
320 ‘nasal prong.’ We limited our search to publications in English reporting studies in humans. In  
321 adults, high-flow oxygen devices are expected to improve respiratory function in a variety of  
322 clinical settings including pulmonary oedema, chronic obstructive pulmonary disease [COPD],  
323 sleep apnoea, pre-oxygenation for intubation, post-extubation respiratory failure, mild-to-  
324 severe acute respiratory distress syndrome [ARDS], and patients with DNI orders.

325 As shown in Tables 4 and 5, several studies conducted in the past decade evaluated the  
326 potential clinical benefits of HFNO in ICU patients. Moreover, HFNO was assessed in high-  
327 quality clinical trials in various settings and patient populations in the last two years.<sup>13,14,39-42</sup>

328 Table 4 reports the outcomes of HFNO therapy in patients with acute hypoxemic  
329 respiratory failure in the ICU or emergency department. HFNO was consistently found to  
330 alleviate respiratory distress (decreases in laboured breathing, respiratory rate, and thoraco-  
331 abdominal asynchrony) and to improve comfort and oxygenation (usually assessed by SpO<sub>2</sub> but  
332 also in some studies by the PaO<sub>2</sub>/FiO<sub>2</sub> ratio or oxygen flows). Interestingly, HFNO proved  
333 feasible in patients with ARDS, obviating the need for intubation in 60% of cases.<sup>43</sup> In other  
334 studies, HFNO decreased the need for intubation or NIV.<sup>44</sup> Important information was obtained  
335 from a cohort of 175 patients with hypoxemic ARF requiring intubation after HFNO failure.<sup>42</sup>  
336 Patients intubated within 48 hours of HFNO initiation had a significantly lower ICU mortality  
337 rate [39.2% vs. 66.7% in patients intubated after at least 48 hours of HFNO,  $P=0.001$ ], a higher  
338 extubation success rate [37.7% vs. 15.6%,  $P=0.006$ ], and a higher number of ventilator-free  
339 days. The FLORALI study is a large, multicentre, randomised, controlled, trial with clinical

340 endpoints that compared HFNO to usual oxygen therapy and to NIV in unselected patients with  
341 hypoxemic ARF.<sup>13</sup> This landmark study established the clinical benefits of HFNO in this  
342 population. Although the overall intubation rate was not significantly different across the three  
343 groups [38% with HFNO, 47% with usual oxygen, and 50% with HFNO+NIV], significantly  
344 fewer patients with severe hypoxemia required intubation in the HFNO group, and the number  
345 of ventilator-free days by day 28 was significantly higher in the HFNO group. Most  
346 importantly, 90-day mortality was significantly lower in the HFNO group than in the other two  
347 groups. This study suggests a role for HFNO in the usual care of unselected ICU patients with  
348 hypoxemic ARF and also raises concerns about the safety of NIV in this population. Because  
349 the primary endpoint [intubation rate] was not significantly influenced by HFNO overall, and  
350 given the concerns raised by the HFNO+NIV combination, confirmatory studies may be  
351 warranted. Also, neutropenic patients and bone marrow transplant [BMT] recipients were  
352 excluded from this trial, although they may account for about 40% of immunocompromised  
353 patients and only 10-15% of patients overall had immunosuppression. Among critically ill  
354 patients, those with immunosuppression have higher intubation and mortality rates, with  
355 substantial changes in recent years.<sup>5</sup> Furthermore, based on evidence of survival benefits with  
356 NIV, there is a grade A recommendation to use NIV in immunocompromised patients with  
357 ARF.<sup>9</sup> A study specifically focussed on patients with immunosuppression is therefore needed.

358         Last, two studies demonstrated clinical benefits from HFNO in patients with hypoxemic  
359 ARF during bronchoscopy.<sup>45, 46</sup> In both studies, HFNO improved oxygenation during and after  
360 the procedure.

361

362 **Table 4: Clinical studies on HFNO therapy in adults with hypoxemic acute respiratory failure [ARF]**

| Reference                                             | Study design                                                                                                                      | Population                                              | N patients | Results                                                                                                                                                                                                                                |
|-------------------------------------------------------|-----------------------------------------------------------------------------------------------------------------------------------|---------------------------------------------------------|------------|----------------------------------------------------------------------------------------------------------------------------------------------------------------------------------------------------------------------------------------|
| <b>Hypoxemic acute respiratory failure in the ICU</b> |                                                                                                                                   |                                                         |            |                                                                                                                                                                                                                                        |
| 22                                                    | Cohort, unselected patients. HFNO 50 L/min vs. face mask oxygen                                                                   | Hypoxaemic ARF                                          | 38         | Improved oxygenation<br>Decreased respiratory rate                                                                                                                                                                                     |
| 23                                                    | Cohort, unselected patients. HFNO 20-30 L/min vs. face mask oxygen                                                                | Hypoxaemic ARF                                          | 20         | Improved oxygenation<br>Decreases in respiratory/heart rates, dyspnoea, respiratory distress, and thoraco-abdominal asynchrony                                                                                                         |
| 44                                                    | HFNO compared to face mask oxygen                                                                                                 | Hypoxaemic ARF                                          | 60         | Decreased treatment failure (defined as need for NIV) from 30% to 10%.<br>Fewer desaturation episodes                                                                                                                                  |
| 48                                                    | Cohort study, HFNO 20-30 L/min vs. face mask oxygen                                                                               | Hypoxaemic ARF                                          | 20         | Improved comfort; Improved oxygenation                                                                                                                                                                                                 |
| 49                                                    | Cohort study (post hoc)                                                                                                           | Hypoxaemic ARF (2009 A/H1N1v outbreak)                  | 20         | 9/20 (45%) success (no intubation). All 8 patients on vasopressors required intubation within 24 hours. After 6 hours of HFNO, non-responders had lower PaO <sub>2</sub> /FiO <sub>2</sub> values and needed higher oxygen flow rates. |
| 43                                                    | Observational, single-centre study                                                                                                | ARDS                                                    | 45         | 40% intubation rate. HFNO failure associated with higher SAPSII, development of additional organ failure, and trends toward lower PaO <sub>2</sub> /FiO <sub>2</sub> values and higher respiratory rates                               |
| 13                                                    | Multicentre, open-label RCT with 3 groups: HFNO, usual oxygen therapy (face mask), or non-invasive positive-pressure ventilation. | Hypoxaemic ARF, PaO <sub>2</sub> /FiO <sub>2</sub> ≤300 | 310        | Intubation rate was 38% with HFNO, 47% with standard oxygen, and 50% with NIV. The number of ventilator-free days by day 28 was significantly higher with HFNO. Decreased D-90 mortality with HFNO                                     |
| 50                                                    | Retrospective before/after study of HFNO                                                                                          | Hypoxaemic ARF                                          | 172        | Reduced need for ventilation (100% vs 63%, <i>P</i> <0.01) and decreased ventilator-free days.                                                                                                                                         |
| 42                                                    | Patients intubated after HFNO                                                                                                     | Hypoxaemic ARF                                          | 175        | In patients intubated early, lower mortality (39.2 vs. 66.7 %), higher extubation success (37.7% vs. 15.6 %) and more ventilator-free days. Early intubation was associated with decreased ICU mortality.                              |
| <b>Hypoxemic acute respiratory failure in the ED</b>  |                                                                                                                                   |                                                         |            |                                                                                                                                                                                                                                        |
| 51                                                    | Patients with ARF (>9 L/min oxygen or clinical signs of respiratory distress)                                                     | Hypoxaemic ARF                                          | 17         | Decreased dyspnoea and respiratory rate and improved oxygenation                                                                                                                                                                       |
| 52                                                    | RCT of HFNO vs. standard oxygen for 1 h                                                                                           | Hypoxaemic ARF                                          | 40         | Decreased dyspnoea and improved comfort                                                                                                                                                                                                |

363

364 Table 5 recapitulates the clinical studies of HFNO after surgery, after extubation, or  
365 before intubation. A recent, large, multicentre, non-inferiority RCT included 830 patients and  
366 compared HFNO to BiPAP for preventing or treating ARF after cardio-thoracic surgery.<sup>14</sup>  
367 HFNO was not inferior to BiPAP, skin breakdown was more common with BiPAP, and none  
368 of the secondary endpoints [including mortality] differed significantly between the two groups.

369 Six studies [five RCTs] evaluated HFNO after extubation. Among them, only one,  
370 performed in obese patients, showed no benefits from HFNO.<sup>39</sup> In the other five RCTs, HFNO  
371 improved oxygenation, comfort, and tolerance; and decreased interface displacements,  
372 respiratory rate, heart rate, and the need for ventilation. The results from the ongoing OPERA  
373 RCT in patients after abdominal surgery can be expected to provide valuable additional data.<sup>53</sup>

374 Last, two studies of HFNO for pre-oxygenation before intubation produced divergent  
375 results. A prospective before/after study compared a non-rebreather with a reservoir bag  
376 ['before' period] to HFNO ['after' period] in 101 patients with hypoxemic ARF requiring  
377 intubation.<sup>54</sup> During the HFNO period, higher values were found for both the lowest SpO<sub>2</sub> value  
378 during intubation (100% vs. 94% during the 'after' period) and the SpO<sub>2</sub> value at the end of  
379 pre-oxygenation. The other study was a multicentre RCT of HFNO vs. a high-FiO<sub>2</sub> bag mask  
380 (Venturi) in 124 adults who had acute hypoxemia requiring intubation with a PaO<sub>2</sub>/FiO<sub>2</sub> ratio  
381 <300 and a respiratory rate  $\geq 30$ /min.<sup>41</sup> No significant differences were found for the lowest  
382 SpO<sub>2</sub> during intubation (91.5% vs. 89.5%,  $p=0.44$ ) or for intubation-related adverse events  
383 including desaturation <80% and death.

384 **Table 5: Clinical studies of HFNO in adults before intubation, after extubation, and after surgery**

| Reference                                        | Study design                                                             | Population                                                                                                             | N patients | Outcome measure                                                                                                                                                       | Results |
|--------------------------------------------------|--------------------------------------------------------------------------|------------------------------------------------------------------------------------------------------------------------|------------|-----------------------------------------------------------------------------------------------------------------------------------------------------------------------|---------|
| <b>After surgery</b>                             |                                                                          |                                                                                                                        |            |                                                                                                                                                                       |         |
| 14                                               | Multicentre RCT of HFNO vs. BiPAP for at least 4 hours per day           | Prevention or treatment of ARF after cardio-thoracic surgery                                                           | 830        | HFNO was not inferior to BiPAP.<br>No difference in ICU mortality<br>Skin breakdown more common with BiPAP after 24 hours                                             |         |
| 39                                               | Cohort                                                                   | Patients with ARF after heart surgery                                                                                  | 20         | Lower respiratory rate and less dyspnoea<br>Improved oxygenation                                                                                                      |         |
| <b>After extubation [to avoid re-intubation]</b> |                                                                          |                                                                                                                        |            |                                                                                                                                                                       |         |
| 40                                               | Single-centre RCT Venturi mask vs. HFNO for 48 h                         | Patients with PaO <sub>2</sub> /FiO <sub>2</sub> ≤300 immediately before extubation                                    | 105        | Improved oxygenation and comfort<br>Fewer patients had interface displacements.<br>Fewer patients required re-intubation or NIV.                                      |         |
| 47                                               | RCT of HFNO until day-2 vs. face mask oxygen                             | Heart surgery patients ready for extubation                                                                            | 340        | Fewer patients needed escalation of respiratory support to NIV.                                                                                                       |         |
| 55                                               | Randomised cross-over study of HFNO vs. Venturi                          | Patients ready for extubation                                                                                          | 50         | Tolerance was better with HFNO.                                                                                                                                       |         |
| 52                                               | Randomised cross-over study of HFNO vs. non-rebreather mask              | Patients ready for extubation                                                                                          | 17         | Less dyspnoea<br>Lower respiratory and heart rates                                                                                                                    |         |
| 39                                               | RCT of HFNO vs. usual care                                               | Patients with a BMI ≥30 ready for extubation after heart surgery                                                       | 155        | No difference in atelectasis scores on Day 1 or 5, mean PaO <sub>2</sub> /FiO <sub>2</sub> ratio, respiratory rate, or re-intubation                                  |         |
| 56                                               | Retrospective study of HFNO vs. non-rebreather face mask                 | Patients ready for extubation                                                                                          | 67         | Improved oxygenation<br>Fewer patients required re-intubation.<br>No difference in mortality                                                                          |         |
| <b>Before intubation [for oxygenation]</b>       |                                                                          |                                                                                                                        |            |                                                                                                                                                                       |         |
| 54                                               | Before-(non-rebreather bag-reservoir mask) after (HFNO) study            | Adults with acute hypoxemia requiring intubation                                                                       | 101        | Higher lowest SpO <sub>2</sub> value during intubation (100% vs. 94%)<br>Higher SpO <sub>2</sub> value at the end of pre-oxygenation                                  |         |
| 41                                               | Multicentre RCT of HFNO throughout the procedure vs. O <sub>2</sub> mask | Adults with acute hypoxemia requiring intubation, PaO <sub>2</sub> /FiO <sub>2</sub> <30, and respiratory rate ≥30/min | 124        | No difference in lowest SpO <sub>2</sub> (91.5 % vs. 89.5%, p=0.44).<br>No difference in intubation-related adverse events including desaturation <80%, and mortality |         |

385



386 **6. Strengths and weaknesses of published data on HFNO**

387 A growing body of evidence suggests that HFNO therapy may be effective for the early  
388 treatment of adults with respiratory failure. However, the areas for which conclusive data exist  
389 and those requiring further investigation need to be identified.

390 At least five points deserve attention. First, the wide variability in inclusion criteria  
391 creates considerable heterogeneity across published studies. For instance, studies of patients  
392 with hypoxaemia included all patients with hypoxaemia, patients with hypoxaemia and  
393 respiratory distress, or patients with a PaO<sub>2</sub>/FiO<sub>2</sub> ratio <300. Second, the primary endpoints  
394 used in some studies were improvements in physiological variables (oxygenation or lung  
395 volumes), which do not always translate into better clinical outcomes (less respiratory distress,  
396 less intubation, or better survival). Third, the HFNO parameters (flow rate, FiO<sub>2</sub>, time of HFNO  
397 exposure) varied in most studies, precluding an assessment of a possible dose-response effect.  
398 Fourth, the magnitude of the benefits from HFNO (odds ratio) on the various endpoints  
399 [oxygenation, comfort, intubation, or survival], varied markedly across studies. This point is  
400 related to the previous one, as dose may influence the effect size. Furthermore, the time of  
401 endpoint evaluation also varied. Finally, and importantly, a variety of comparators were used,  
402 including low-flow oxygen, Venturi mask, and NIV. This last point is a major source of bias  
403 and reflects the current uncertainty about what should be the reference or “standard” for oxygen  
404 therapy in patients with acute hypoxaemia.

405 The therapeutic effect of HFNO may stem from the humidification and/or warming of the  
406 inspired gas, high flow, high FiO<sub>2</sub>, continuous use (as opposed to intermittent use with NIV),  
407 or any combination thereof. Usual care generally involves oxygen delivery via a face mask or  
408 nasal cannula, at flows no higher than 15 L/min. Therefore, the improved oxygenation (higher  
409 SpO<sub>2</sub> or PaO<sub>2</sub> values) seen with HFNO may be simply a pharmacological effect of the high

410 flow of oxygen. Moreover, when there are large differences between the patient's inspiratory  
411 flow and the delivered flow,  $FiO_2$  values are difficult to control and usually lower than  
412 predicted. HFNO, however, effectively delivers high flows with actual  $FiO_2$  values that are  
413 usually close to those delivered by the device.<sup>36</sup> These considerations emphasise the importance  
414 of using clinical endpoints such as the intubation rate or mortality, rather than physiological  
415 endpoints such as  $SpO_2$  or  $PaO_2/FiO_2$ .

416 A fundamental difference between HFNO and NIV is that HFNO systems maintain a  
417 fixed flow and generate variable pressures, whereas many NIV systems use a variable flow to  
418 generate a fixed pressure, precluding the manipulation of alveolar ventilation. Another major  
419 difference is that the anatomical dead space is increased by NIV interfaces and decreased by  
420 HFNO interfaces. With the open HFNO circuit VT cannot be actively increased. Nevertheless,  
421 HFNO helps patients by improving alveolar ventilation and decreasing the anatomical dead  
422 space. Given these considerations, when comparing HFNO to NIV<sup>13</sup> or BiPAP,<sup>14</sup> in addition to  
423 oxygenation and comfort, volume ventilation and pressures (expiratory VT and peak pressures)  
424 should be carefully monitored in both groups to determine whether improvements in these  
425 parameters in the HFNO group are related to HFNO or to high-volume ventilation in the control  
426 group responsible for deleterious effects due to volutrauma.

427

## 428 **7. HFNO in immunocompromised patients**

429        Among patients with ARF, those with immunosuppression have higher mortality rates  
430 compared to unselected patients. The use of endotracheal mechanical ventilation is associated  
431 with higher mortality in immunocompromised patients. Therefore, management techniques that  
432 decrease the need for intubation may hold promise for decreasing mortality.

433        Four studies evaluated the feasibility and safety of HFNO in immunocompromised  
434 patients with ARF. In a retrospective single-centre study reported in 2013, the feasibility of  
435 HFNO was evaluated in 45 patients with haematological malignancies, chiefly acute myeloid  
436 leukaemia [46.7%], myelodysplastic syndrome [13.3%], and lymphoma [11.1%].<sup>57</sup> There was  
437 a history of bone marrow transplantation in 21 [46.7%] patients, recent systemic chemotherapy  
438 in 22 [48.9%] patients, and current neutropenia in 19 [42.2%] patients. HFNO therapy was  
439 titrated to provide a FiO<sub>2</sub> that maintained PaO<sub>2</sub> >90% and a flow of up to 45-50 L/minute. Of  
440 the 45 patients, 15 recovered without intubation [33%]; their hospital mortality rate was 2/15  
441 [13.3%], compared to 26/30 [86.7%] of the patients who failed HFNO and required intubation,  
442 although the APACHE II score on the day of HFNO initiation was not significantly different  
443 between the two groups. HFNO failure was significantly associated with bacterial pneumonia  
444 as the cause of ARF. In a single-centre study of patients with solid tumours reported in 2011,  
445 of 183 patients taken at random from the institutional database, 132 [72%] had received HFNO  
446 in the ICU to treat hypoxia.<sup>58</sup> Among them, 41% improved and 44% remained stable while on  
447 HFNO, whereas 15% declined. A 2013 report describes a study in 30 patients with advanced  
448 cancer and persistent dyspnoea that used a randomised design to compare the physiological  
449 effects of HFNO versus BiPAP for 2 hours.<sup>59</sup> Both treatments similarly improved the dyspnoea,  
450 as assessed using a visual analogue scale and the modified Borg scale, and non-significantly  
451 diminished the respiratory rate. Oxygen saturation improved only with HFNO. Neither

452 technique induced major adverse effects. The last study, published in 2015, evaluated HFNO  
453 for treating ARF requiring ICU admission in 37 lung transplant recipients.<sup>60</sup> HFNO proved  
454 feasible and safe and decreased the absolute risk of intubation by 29.8%, with a number-needed-  
455 to-treat to avoid one intubation of 3. Last, in a study of 50 DNI patients with hypoxemic  
456 respiratory distress, including a third of immunocompromised patients, HFNC allowed an  
457 improvement in oxygenation and decreased respiratory rate.<sup>61</sup>,

458

459

## 460 **8. Preliminary results from our study group**

461 The first study, by Mokart et al., analysed a retrospective cohort of 178 patients with  
462 cancer and ARF ( $O_2 > 9$  L/min), including 76 (43%) treated with NIV+HFNO, 74 (42%) with  
463 NIV+low/medium-flow  $O_2$ , 20 (11%) with HFNO alone, and 8 with low/medium-flow  $O_2$   
464 alone.<sup>62</sup> NIV+HFNO was associated with lower mortality (37% vs. 52% in remaining patients,  
465  $p=0.04$ ) and was independently associated with lower day-28 survival in a propensity-score  
466 analysis. Last, in a sub-study of data from our recent iVNIctus RCT of early NIV in  
467 immunocompromised patients with ARF,<sup>63</sup> 141/374 (38%) patients received HFNO, and either  
468 NIV or low/medium-flow oxygen was used in the other patients. To allow accurate adjustment,  
469 we built a propensity score using variables available at ICU admission. Intubation rate and day-  
470 28 mortality were not significantly different in the HFNO arm compared to the NIV or  
471 low/medium-flow oxygen arm. However, as shown in Figure 3, neither the intubation rate nor  
472 the day-28 mortality was higher in the group given HFNO+NIV.

473 Although the effects of HFNO have varied across studies, the data establish that this  
474 treatment modality is feasible and safe in immunocompromised patients. They also demonstrate  
475 that outcomes with HFNO are at least as good as with other oxygen therapy methods in this  
476 population. Thus, they warrant further trials to determine whether HFNO improves survival in  
477 unselected immunocompromised patients with hypoxemic ARF.

478 **Figure 3: Data from our recent trial on the use of HFNO in immunocompromised patients**

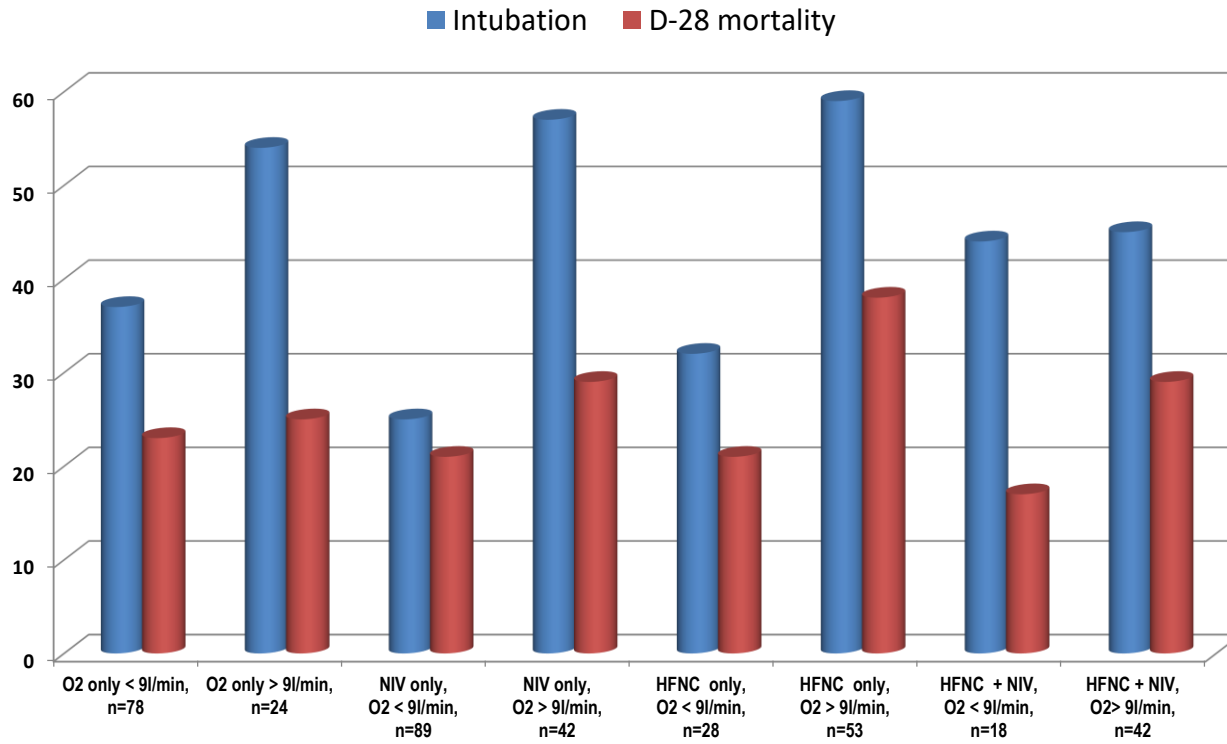

479

480

481 **9. What is the standard of care for providing oxygen to immunocompromised patients? NIV is not**  
482 **superior over low/medium-flow oxygen**

483 The answer to this question has been provided by the iVNIctus trial, completed by the Grrr-OH in  
484 January 2015 and recently accepted for publication. This multicentre randomised trial was performed in  
485 26 ICUs to determine whether early NIV improved survival in immunocompromised patients with non-  
486 hypercapnic hypoxaemic ARF. Patients were randomly assigned to early NIV or low/medium-flow  
487 oxygen therapy alone. HFNO was allowed in both groups, if deemed appropriate by the physician in  
488 charge. The primary outcome was day-28 mortality.

489 Of the 374 enrolled patients, 191 were assigned to early NIV and 183 to oxygen only. At  
490 randomisation, median [interquartile range] oxygen flow was 9 [5-15] L/min in the NIV group and 9 [6-  
491 15] L/min in the oxygen group. All patients in the NIV group received the first NIV session immediately  
492 after randomisation. On day-28 after randomisation, 46 [24.1%] deaths had occurred in the NIV group  
493 vs. 50 [27.3%] in the oxygen group [ $p=0.47$ ]. Oxygenation failure occurred in 155 [41.4%] patients  
494 overall, 73 [38.2%] in the NIV group, and 82 [44.8%] in the oxygen group [ $p =0.20$ ]. There were no  
495 significant differences in ICU-acquired infections, duration of mechanical ventilation, or lengths of ICU  
496 or hospital stays. These results demonstrate that, in immunocompromised patients admitted to the ICU  
497 with hypoxemic ARF, early NIV does not reduce day-28 mortality compared to oxygen therapy alone.  
498 The standard of care for oxygenation in critically ill immunocompromised patients should thus be either  
499 low/medium-flow oxygen or NIV, as decided by the physician. Last, as mentioned above (in the section  
500 on preliminary data from our study group), HFNO was used in about 40% of the patients overall and was  
501 not associated with lower intubation rates or mortality, even after adjustment on confounders.

---

502 P150912\_nifc-HIGH-Patient\_v1-0-20160212

*Ce document est la propriété du DRCD / APHP. Toute reproduction est formellement interdite.*

Suivant modèle REC-DTYP-0051 version 1 du 14/05/2012

503 In sum, the use of HFNO is increasing steadily, based on its ease of use, theoretical advantages over  
504 low/medium-flow nasal or face mask oxygen, and clinical data suggesting superiority over other oxygen-  
505 delivery systems in unselected patients with hypoxemia. Immunocompromised patients have specific  
506 treatment needs, as shown by their 2-fold higher mortality rate after intubation compared to other patients.  
507 Data on HFNO in immunocompromised patients are conflicting (see point 8 above). Moreover,  
508 NIV+HFNO was harmful in the FLORALI RCT in unselected hypoxemic patients, whereas NIV, even  
509 when combined with HFNO, had no deleterious effects in the immunocompromised patients in two other  
510 studies.<sup>62,63</sup> Furthermore, data on optimal HFNO modalities are urgently needed.

511 Thus, a study of the efficacy and safety of HFNO in immunocompromised patients is timely. We  
512 therefore designed the present RCT [HIGH], which we are submitting to the 2015 PHRC-N call for  
513 projects. This RCT is a non-inferiority study of HFNO versus other oxygenation strategies [low/medium-  
514 flow oxygen and/or NIV] in immunocompromised patients requiring oxygen. The primary endpoint is  
515 day-28 survival. The patients will be recruited at 26 centres belonging to a research network that  
516 specialises in the management of critically ill immunocompromised patients and has a particularly high  
517 level of expertise in respiratory care strategies. The control group will receive low/medium-flow oxygen  
518 and/or NIV as deemed appropriate by the physician, since the recent large iVNIctus trial by our group did  
519 not show any superiority of NIV (on intubation rates or survival). The experimental group will receive  
520 continuous HFNO at any time after ICU admission, for pre-oxygenation before intubation, after  
521 extubation, and for any ICU procedure that might induce hypoxemia).



523 **10. Participating centres: the *Groupe de Recherche Respiratoire en Réanimation Onco-***  
524 ***Hématologique (Grrr-OH)***

525 All participating centres belong to the Grrr-OH, a research network specialising in the respiratory  
526 care of critically ill immunocompromised patients. All these centres have previously taken part in  
527 observational studies, surveys, or therapeutic trials. They all have high case-volumes of patients with  
528 immune deficiencies due to immunosuppressive drugs, solid-organ transplantation, malignancies, or  
529 systemic diseases. Although they are specialized in oncology and haematology, they also admit high  
530 volumes of patients with systemic diseases, solid organ transplant and other immunosuppression.

531 All centres are in France, except 14 and 15, which are in Belgium.  
532

## Participating ICUs

|    |                          |                                            |                                                                                            |              |              |
|----|--------------------------|--------------------------------------------|--------------------------------------------------------------------------------------------|--------------|--------------|
| 1  | Dr. LEMIALE Virginie     | Saint Louis, Paris                         | <a href="mailto:Virginie.lemiale@sls.aphp.fr">Virginie.lemiale@sls.aphp.fr</a>             | 0142499421   | Medical ICU  |
| 2  | Prof. DEMOULE Alexandre  | Pitié-Salpêtrière, Paris                   | <a href="mailto:alexandre.demoule@psl.aphp.fr">alexandre.demoule@psl.aphp.fr</a>           | 0142167858   | Medical ICU  |
| 3  | Dr Anabelle Stocklin     | IGR, Villejuif                             | <a href="mailto:anabelle.stocklin@gustaveroussy.fr">anabelle.stocklin@gustaveroussy.fr</a> | 0142114211   | Med-Surg ICU |
| 4  | Prof. PENE Frédéric      | Cochin, Paris                              | <a href="mailto:Frederic.pene@cch.aphp.fr">Frederic.pene@cch.aphp.fr</a>                   | 0158414141   | Medical ICU  |
| 5  | Dr. MOKART Djamel        | Paoli-Calmettes, Marseille                 | <a href="mailto:MOKARTD@ipc.unicancer.fr">MOKARTD@ipc.unicancer.fr</a>                     | 04 912479 76 | Med-Surg ICU |
| 6  | Prof. BOUADMA Lila       | Bichat, Paris                              | <a href="mailto:lila.bouadma@aphp.fr">lila.bouadma@aphp.fr</a>                             | 0140257707   | Medical ICU  |
| 7  | Dr. KOUATCHET Achille    | CHU, Angers                                | <a href="mailto:AcKouatchet@chu-angers.fr">AcKouatchet@chu-angers.fr</a>                   | 0241353655   | Medical ICU  |
| 8  | Prof. DARMON Michael     | CHU, St-Etienne                            | <a href="mailto:michael.darmon@chu-st-etienne.fr">michael.darmon@chu-st-etienne.fr</a>     | 0477120934   | Medical ICU  |
| 9  | Dr. MOREAU Anne-Sophie   | CHRU, Lille                                | <a href="mailto:anne.sophie.moreau@gmail.com">anne.sophie.moreau@gmail.com</a>             | 032044 48 60 | Medical ICU  |
| 10 | Dr. RABBAT Antoine       | Cochin, Paris                              | <a href="mailto:Antoine.rabbat@cch.aphp.fr">Antoine.rabbat@cch.aphp.fr</a>                 | 0158414141   | Medical ICU  |
| 11 | Prof. PAPAZIAN Laurent   | Marseille Nord, Marseille                  | <a href="mailto:laurent.papazian@ap-hm.fr">laurent.papazian@ap-hm.fr</a>                   | 0413207116   | Medical ICU  |
| 12 | Dr. SEGUIN Amélie        | CHU, Caen                                  | <a href="mailto:amelie.seguin@free.fr">amelie.seguin@free.fr</a>                           | 023822 24 11 | Medical ICU  |
| 13 | Dr. BARBIER François     | CHG, Orléans                               | <a href="mailto:Francois.barbier@chr-orleans.fr">Francois.barbier@chr-orleans.fr</a>       | 02385144 44  | Med-Surg ICU |
| 14 | Prof. BENOIT Dominique   | University Hospital, Ghent, Belgium        | <a href="mailto:Dominique.Benoit@ugent.be">Dominique.Benoit@ugent.be</a>                   | +3292606475  | Med-Surg ICU |
| 15 | Prof. MEERT Anne-Pascale | Jules Bordet, Institute, Brussels, Belgium | <a href="mailto:ap.meert@bordet.be">ap.meert@bordet.be</a>                                 | +3225413111  | Medical ICU  |
| 16 | Prof. FARTOUKH Muriel    | Tenon, Paris                               | <a href="mailto:muriel.fartoukh@tnn.aphp.fr">muriel.fartoukh@tnn.aphp.fr</a>               | 0156016574   | Med-Surg ICU |
| 17 | Prof. ARGAUD Laurent     | Edouard Herriot, Lyon                      | <a href="mailto:laurent.argaud@chu-lyon.fr">laurent.argaud@chu-lyon.fr</a>                 | 0472110015   | Medical ICU  |
| 18 | Dr. LEBERT Christine     | District Hospital, Les Oudairies           | <a href="mailto:christine.lebert@chd-vendee.fr">christine.lebert@chd-vendee.fr</a>         | 0251446470   | Med-Surg ICU |
| 19 | Dr. BRUNEEL Fabrice      | André Mignot, Le Chesnay                   | <a href="mailto:fbruneel@ch-versailles.fr">fbruneel@ch-versailles.fr</a>                   | 0139639133   | Med-Surg ICU |
| 20 | Dr. NYUNGA Martine       | Victor Provo, Roubaix                      | <a href="mailto:Martine.nyunga@ch-roubaix.fr">Martine.nyunga@ch-roubaix.fr</a>             | 0320993172   | Med-Surg ICU |
| 21 | Dr. PEREZ Pierre         | Hôpital Brabois, Nancy                     | <a href="mailto:p.perez@chu-nancy.fr">p.perez@chu-nancy.fr</a>                             | 0383154084   | Medical ICU  |
| 22 | Dr. KONTAR Loay          | CHU, Amiens                                | <a href="mailto:Kontar.Loay@chu-amiens.fr">Kontar.Loay@chu-amiens.fr</a>                   | 0322455854   | Medical ICU  |
| 23 | Prof. TAMION Fabienne    | CHU Nicolle, Rouen                         | <a href="mailto:fabienne.tamion@chu-rouen.fr">fabienne.tamion@chu-rouen.fr</a>             | 0232888261   | Medical ICU  |
| 24 | Dr. GUITTON Christophe   | CHU, Nantes                                | <a href="mailto:christophe.guitton@chu-nantes.fr">christophe.guitton@chu-nantes.fr</a>     | 0240375655   | Medical ICU  |

P150912\_nifc-HIGH-Patient\_v1-0-20160212

*Ce document est la propriété du DRCD / APHP. Toute reproduction est formellement interdite.*

Suivant modèle REC-DTYP-0051 version 1 du 14/05/2012

|    |                       |                  |                                     |            |             |
|----|-----------------------|------------------|-------------------------------------|------------|-------------|
| 25 | Prof. SCHWEBEL Carole | CHU, Grenoble    | carole.schwebel@chu-grenoble.fr     | 0476767575 | Medical ICU |
| 26 | Prof. KLOUCHE Kada    | CHU, Montpellier | <u>k-klouche@chu-montpellier.fr</u> | 0467336733 | Medical ICU |

535

| Expected number of eligible patients in the participating centres |                        |                                            |                                                 |                    |
|-------------------------------------------------------------------|------------------------|--------------------------------------------|-------------------------------------------------|--------------------|
| #                                                                 | Investigator           | Centre                                     | Expected number of patients recruited per month | Total in 24 months |
| 1                                                                 | Dr. LEMIALE Virginie   | Saint Louis, Paris                         | 3                                               | 72                 |
| 2                                                                 | Pr. DEMOULE Alexandre  | Pitié-Salpêtrière, Paris                   | 2                                               | 48                 |
| 3                                                                 | Dr Anabelle Stocklin   | IGR, Villejuif                             | 1                                               | 24                 |
| 4                                                                 | Pr. PENE Frédéric      | Cochin, Paris                              | 2                                               | 48                 |
| 5                                                                 | Dr. MOKART Djamel      | Paoli-Calmettes, Marseille                 | 2                                               | 48                 |
| 6                                                                 | Pr. BOUADMA Lila       | Bichat, Paris                              | 1                                               | 24                 |
| 7                                                                 | Dr. KOUATCHET Achille  | CHU, Angers                                | 1                                               | 24                 |
| 8                                                                 | Pr. DARMON Michael     | CHU, St-Etienne                            | 1                                               | 24                 |
| 9                                                                 | Dr. MOREAU Anne-Sophie | CHRU, Lille                                | 2                                               | 48                 |
| 10                                                                | Dr. RABBAT Antoine     | Cochin, Paris                              | 1                                               | 24                 |
| 11                                                                | Pr. PAPAIZIAN Laurent  | Marseille Nord, Marseille                  | 1                                               | 24                 |
| 12                                                                | Dr. SEGUIN Amélie      | CHU, Caen                                  | 1                                               | 24                 |
| 13                                                                | Dr. BARBIER François   | CHG, Orléans                               | 1                                               | 24                 |
| 14                                                                | Pr. BENOIT Dominique   | University Hospital, Ghent, Belgium        | 1                                               | 24                 |
| 15                                                                | Pr. MEERT Anne-Pascale | Jules Bordet, Institute, Brussels, Belgium | 1                                               | 24                 |
| 16                                                                | Pr. FARTOUKH Muriel    | Tenon, Paris                               | 1                                               | 24                 |
| 17                                                                | Pr. ARGAUD Laurent     | Edouard Herriot, Lyon                      | 2                                               | 48                 |
| 18                                                                | Dr. LEBERT Christine   | District Hospital, Les Oudairies           | 1                                               | 24                 |
| 19                                                                | Dr. BRUNEEL Fabrice    | André Mignot, Le Chesnay                   | 1                                               | 24                 |
| 20                                                                | Dr. NYUNGA Martine     | Victor Provo, Roubaix                      | 1                                               | 24                 |
| 21                                                                | Dr. PEREZ Pierre       | Hôpital Brabois, Nancy                     | 1                                               | 24                 |
| 22                                                                | Dr. KONTAR Loay        | CHU, Amiens                                | 1                                               | 24                 |
| 23                                                                | Pr. TAMION Fabienne    | CHU Nicolle, Rouen                         | 2                                               | 48                 |
| 24                                                                | Dr. GUITTON Christophe | CHU, Nantes                                | 1                                               | 24                 |

P150912\_nifc-HIGH-Patient\_v1-0-20160212

*Ce document est la propriété du DRCD / AHP. Toute reproduction est formellement interdite.*

Suivant modèle REC-DTYP-0051 version 1 du 14/05/2012

|    |                     |                  |    |              |
|----|---------------------|------------------|----|--------------|
| 25 | Pr. SCHWEBEL Carole | CHU, Grenoble    | 1  | 24           |
| 26 | Pr. KLOUCHE Kada    | CHU, Montpellier | 1  | 24           |
|    | TOTAL               | 26 CENTRES       | 34 | 816 PATIENTS |

536  
537  
538

These numbers were drawn from our recent iVNictus trial

Of note: We have invited 14 additional centres belonging to the Grrr-OH to participate, and we are awaiting their responses.

### 53911. Study objective and major hypothesis

540 The **primary objective** of this trial is to determine whether HFNO is not inferior to the usual care  
541 for the oxygenation of hypoxemic critically ill immunocompromised patients, regarding all-cause day-28  
542 mortality.

543 The **secondary study objectives** are to determine whether HFNO is superior over usual-care  
544 oxygenation in producing the following outcomes:

545- Lower intubation rate (proportion of patients requiring invasive mechanical ventilation) on days 3 and  
546 28;

547- Better patient comfort (visual analogue scale [VAS]);

548- Less dyspnoea (VAS and Borg scale);

549- Lower respiratory rate;

550- Better oxygenation (assessed based on the lowest SpO<sub>2</sub> value and on PaO<sub>2</sub>/FiO<sub>2</sub> from day 1 to day 3;

551- Shorter ICU stay length;

552- Lower incidence of ICU-acquired infections;

553- Faster resolution of pulmonary infiltrates on chest X-rays (Murray score);

554- Higher oxygen-therapy-free and ventilation-free survival rates on day 28;

555- Lower re-intubation rate;

556- Higher median value of the lowest SpO<sub>2</sub> during intubation;

557- Absence of a higher mortality rate in patients intubated after HFNO compared to patients in the control  
558 group

559- Better satisfaction of the patients and physicians (VASs).

---

560 P150912\_nifc-HIGH-Patient\_v1-0-20160212

*Ce document est la propriété du DRCD / APHP. Toute reproduction est formellement interdite.*

Suivant modèle REC-DTYP-0051 version 1 du 14/05/2012

**56112. Methods: non-inferiority randomised active-controlled design**

562 The study aims to evaluate HFNO in immunocompromised patients admitted to the ICU and  
563 requiring oxygen therapy. It will use a non-inferiority design.

564 In the HIGH trial, our goal is not to determine that HFNO is more effective than other oxygenation  
565 methods. Instead, we aim to determine whether HFNO is **not inferior** to usual-care oxygenation, because  
566 it has other advantages, such as lower cost, lower nurse workload, less patient discomfort, better tolerance,  
567 and less skin breakdown. Thus, if HFNO is not inferior to usual-care oxygenation methods, then it would  
568 deserve to be used instead of these methods. Although superiority or inferiority of a new treatment can  
569 be demonstrated by a superiority trial, an experimental treatment that is not significantly better than the  
570 control is not necessarily as good as the control. When a new treatment has known advantages other than  
571 better efficacy, then proof that its efficacy is not inferior to that of current treatments is sufficient to  
572 warrant its preferential use.

573 A non-inferiority trial aims at assessing whether the experimental intervention being evaluated is  
574 not worse than the control by more than a certain amount, known as the non-inferiority margin (Figure  
575 4).<sup>65</sup> This margin is determined before the study onset, based on what constitutes a clinically important  
576 difference, the expected event rates, and, in some cases, regulatory requirements. Other determinants of  
577 the non-inferiority margin include the known effect of the control treatment vs. a placebo; disease  
578 severity; toxicity, workload, and/or cost of the control treatment; and the primary endpoint. A small non-  
579 inferiority margin is usually appropriate if the disease under investigation is severe or if the primary  
580 endpoint is death.

581 Because a non-inferiority trial aims to demonstrate non-inferiority, and not to distinguish non-  
582 inferiority from superiority, it uses a one-sided confidence interval. (Figure 4)

583 **Figure 4 adapted from Kaji and Lewis JAMA 2015<sup>65</sup>: Two different possible results of a non-  
584 inferiority trial, summarised by one-tailed confidence intervals for the relative efficacy of the new  
585 and active-control treatments**

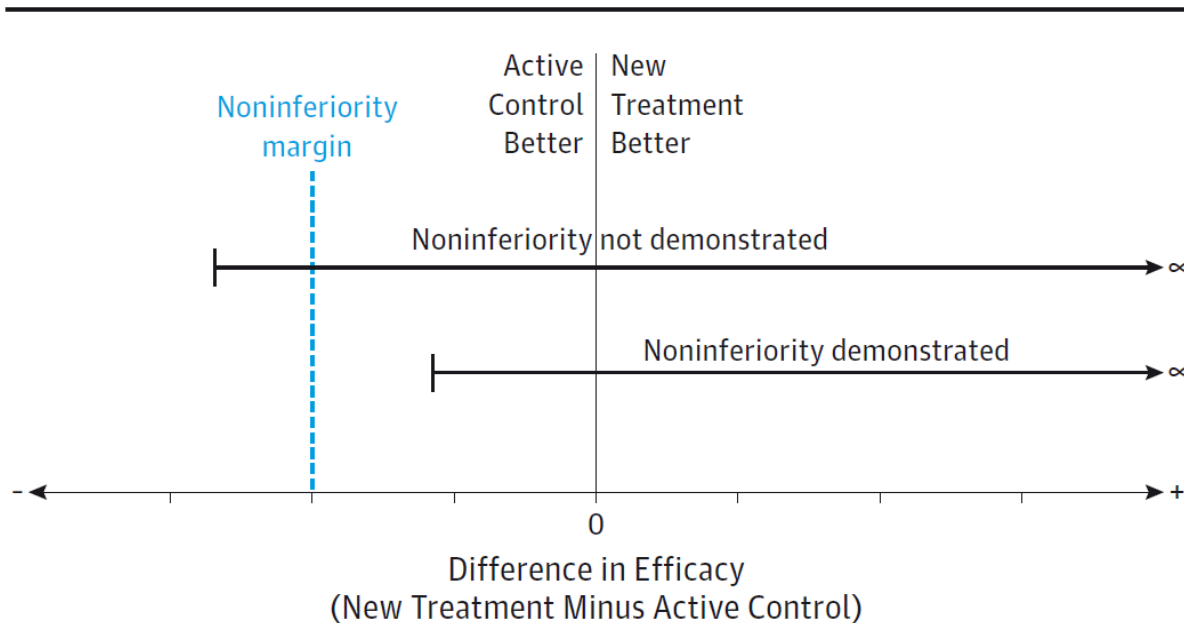

587  
588  
589 In the top example of Figure 4, the lower boundary of the confidence interval lies to the left of the  
590 lower boundary of the non-inferiority margin, indicating that the inferiority in effect versus the control  
591 may be larger than the non-inferiority margin. Thus, the new treatment may be worse than the control  
592 treatment.

593 In the bottom example of Figure 4, the lower boundary of the confidence interval lies within the  
594 non-inferiority margin, demonstrating non-inferiority of the new treatment relative to the active-control



595 treatment. The overall result of the trial is defined by the lower limit of the one-sided confidence interval  
596 rather than by the point estimate for the treatment effect, and the point estimates are therefore not shown.  
597  
598

599 We extensively discussed the study design with the study-group physicians at our meeting on July  
600 2, 2015; opinion leaders in the field of acute respiratory failure [REVA network]; and reviewers of the  
601 2015 PHRC-N [who had commented on this point]. We also based our assumptions on results of the trials  
602 by Ferrer and Stephan.<sup>14, 66</sup> We agree with the PHRC reviewers that the non-inferiority design is the best  
603 option. For all stakeholders, a 9% non-inferiority margin appears clinically relevant. Non-inferiority of  
604 HFNO will thus be demonstrated if the lower boundary of the 95% CI is less than 9%.

605  
606 For all secondary outcomes, we hypothesised that HFNO could be superior over the control. Thus,  
607 comparison tests will be used (see below, Statistical section).

608 Eligible patients are immunocompromised patients who are admitted to the ICU and need oxygen  
609 supplementation at any stage of their ICU stay. All randomized patients will be included in the full set of  
610 analysis (intent-to-treat basis).

611  
612 **A. Inclusion criteria**

613 - Adult

614 - Known immunosuppression defined as one or more of the following: (a) immunosuppressive drug or  
615 long-term [ $>3$  months] or high-dose [ $>0.5$  mg/kg/day] steroids; (b) solid organ transplantation; (c) solid  
616 tumour; (d) haematological malignancy; (e) HIV infection.

617 - ICU admission for any reason

618 - Need for oxygen therapy defined as one or more of the following: (a) respiratory distress with a  
619 respiratory rate >30/min; (b) cyanosis; (c) laboured breathing; (d) SpO<sub>2</sub><90%; and (e) expected  
620 respiratory deterioration during a procedure

621 - Written informed consent from the patient or proxy

622 Patients with do-not-intubate [DNI] orders will be eligible.

623

624 **B. Exclusion criteria**

625 - Patient admitted to the ICU for end-of-life care

626 - Refusal of study participation by the patient or proxy

627 - Hypercapnia with a formal indication for NIV

628 - Isolated cardiogenic pulmonary oedema [formal indication for NIV]

629 - Pregnancy or breastfeeding

630 - Anatomical factors precluding the use of a nasal cannula

631 - Absence of coverage by the French statutory healthcare insurance system

632

633 **C. Description of the intervention**

634 This open randomised controlled trial will compare two oxygenation strategies.

635 *Usual care [control group]*

636 Patients in the control group will receive the best standard of care, according to the usual practice  
637 of the local intensivists and primary-care physicians. Oxygen therapy will be delivered using any device  
638 or combination of devices that are part of usual care: nasal oxygen, mask with or without a reservoir bag

---

P150912\_nifc-HIGH-Patient\_v1-0-20160212

*Ce document est la propriété du DRCD / APHP. Toute reproduction est formellement interdite.*

Suivant modèle REC-DTYP-0051 version 1 du 14/05/2012

639 and with or without the Venturi system, and NIV. Oxygen settings are set to target an  $SpO_2 \geq 95$ . HFNO  
640 will not be used in the control group. The recent iVNIctus trial [manuscript in press] in  
641 immunocompromised ICU patients showed no difference between usual-care oxygen and early NIV in  
642 terms of mortality or intubation rates. This finding supports the scientific and ethical acceptability of using  
643 either usual-care oxygen or NIV in the control group, according to local protocols and preferences. The  
644 reasons for NIV use will be documented in the eCRF. ICU discharge will be allowed when patients will  
645 meet the ability to maintain  $SpO_2 \geq 95\%$  with less than 2 L/min oxygen.

646  
647 *High-flow nasal oxygen [intervention group]*

648 Patients in the HFNO group will receive the best standard of care, according to the usual practice of  
649 the local intensivists and primary physicians, with one exception: supplemental oxygen will be provided  
650 only by continuous HFNO. HFNO will be initiated at a flow rate of 50 L/min and 100%  $FiO_2$ . If the target  
651  $SpO_2$  is not reached, the flow rate will be increased to 60 L/min. Then,  $FiO_2$  will be tapered to target an  
652  $SpO_2 \geq 95$ . The minimal flow rate will be 40 L/min. In patients who require intubation, HFNO will be used  
653 during laryngoscopy and immediately after extubation. Also, HFNO will be used before, during, and after  
654 all ICU procedures. Patients with discomfort due to HFNO will have their flow rate decreased until the  
655 discomfort resolves. If the nasal prongs generate significant discomfort or skin breakdown, a Venturi  
656 mask will be used instead until HFNO can be used again; except in this situation, neither NIV nor standard  
657 oxygen will be used in the intervention group.

658 HFNO will be stopped based on clinical criteria [improvement of clinical signs of respiratory  
659 distress],  $\text{PaO}_2/\text{FiO}_2 > 300$ , and ability to maintain  $\text{SpO}_2 \geq 95\%$  with less than 2 L/min oxygen via a low-  
660 flow device [allowing ICU discharge as HFNO may not be available in the wards].

661 Patients already receiving HFNO at ICU admission are eligible for this study. Patients intubated at  
662 ICU admission become eligible for this study immediately after extubation.

663 NIV will not be allowed in the experimental group, because the FLORALI study showed higher mortality  
664 with HFNO+NIV.

#### 666 *D. Subgroups of interest*

667 Randomisation will be stratified on two factors, namely, hypoxaemia severity [ $\text{PaO}_2/\text{FiO}_2 < 200$  vs.  
668  $\geq 200$  at randomisation] and any organ dysfunction in addition to the respiratory failure [based on the  
669 SOFA score definition]. Thus, analysis could consider treatment-by-subset interaction on such strata.

670 We have also predefined four subgroups of interest, defined based on factors for which no  
671 stratification will be performed though interaction tests are scheduled to be performed. One is the  
672 subgroup of patients who required intubation after randomisation and received HFNO during intubation;  
673 the outcome measures will be the median lowest  $\text{SpO}_2$  during intubation and  $\text{PaO}_2/\text{FiO}_2$  60 minutes after  
674 intubation. Another is the subgroup of patients managed with HFNO after extubation, the outcome  
675 measure will be the re-intubation rate. Another is the group of patients who will be intubated in the two  
676 groups; the outcome measures will be D-28 mortality as HFNO may have delayed intubation. Finally, we  
677 will study the subgroup with DNI orders.

678 For all these subsets, interaction test between benefit in terms of ICU mortality between the HFNO  
679 and control groups, according to the strata, will be performed (See below, the Statistical section for further  
680 details on tests).

681

## 682 **E. Endpoints**

### 683 **Primary endpoint [non-inferiority of HFNO compared to usual care]**

684 All-cause day-28 mortality

### 685 **Secondary endpoints [superiority of HFNO compared to usual care]**

686 - Intubation rate [proportion of patients requiring invasive mechanical ventilation] on days 3 and 28

687 - Patient comfort [VAS score]

688 - Intensity of dyspnoea [VAS score and Borg scale]

689 - Respiratory rate

690 - Oxygenation [based on continuous SpO<sub>2</sub> monitoring, lowest SpO<sub>2</sub> from D1 to D3 and PaO<sub>2</sub>/FiO<sub>2</sub> on  
691 D1, D2, and D3]

692 - ICU stay length

693 - Incidence of ICU-acquired infections

694 - Time to clear pulmonary infiltrates [Murray score]

695 - Oxygen-free and ventilation-free survivals [days] by day 28

696 - Re-intubation rate [for patients who were extubated during the study period]

697 - Lowest median SpO<sub>2</sub> during intubation [for patients who were intubated during the study period]

698 - In DNI patients, intubation rate, survival, and comfort

---

P150912\_nifc-HIGH-Patient\_v1-0-20160212

*Ce document est la propriété du DRCD / APHP. Toute reproduction est formellement interdite.*

Suivant modèle REC-DTYP-0051 version 1 du 14/05/2012

699 - Mortality in patients intubated after HFNO use [compared with control-group patients]

700 - Satisfaction of the patients and physicians

701

702 ***F. Possible difficulties, unwanted effects, and safety issues***

7031. ***Patient recruitment:*** We do not anticipate difficulties with patient recruitment, as each ICU admits at  
704 least 50 immunocompromised patients per year on average. As reported in the table above, the 26 centres  
705 have to include 1 to 2 patients per month to complete the recruitment period within 24 months.  
706 Recruitment for the iVNIctus trial by the same group ended 6 months earlier than expected.

7072. ***Physician availability to include patients:*** The study will require at least 1 hour of work per day at  
708 inclusion and 30 minutes on each subsequent study day. During the investigator meeting held to prepare  
709 the study design [July 2, 2015], all the investigators expressed keen interest in the study and a firm  
710 commitment to making themselves readily available to include patients. The hiring of research assistants  
711 [1 day per centre per week] was also perceived very positively by the investigators.

7123. ***Ethical and organisational issues:*** All the investigators agreed that equipoise was obvious, with  
713 low/medium-flow oxygen, NIV, and HFNO being equally appropriate. None of the investigators voiced  
714 concern about not using HFNO in half the patients. Also, the conflicting data available so far about the  
715 effects of HFNO in immunocompromised patients contributes to the enthusiasm that surrounds this trial.  
716 All participating ICUs are fully able to provide immunocompromised patients with the best standard of  
717 care.

718 **4. *Responsibility issues and insurance:*** This study uses devices that allow oxygen delivery.  
719 low/medium-flow, NIV, and HFNO devices are on the market and are approved for this indication. At

720 present, the choice among these three options is at the discretion of the physician. Thus, our trial comes  
721 within the purview of studies of ‘usual care’ [*soins courants*].  
722



### 72313. Hypotheses and expected changes based on the study results

724 *If the study intervention produces beneficial effects*

725       The study intervention is safe, feasible, and effective for providing oxygen to critically ill patients.  
726 If the HIGH trial demonstrates non-inferiority of HFNO, then HFNO will deserve preference as this  
727 method is associated with better patient comfort, greater dyspnoea relief, and a lower healthcare provider  
728 workload. Otherwise, all our secondary endpoints are based on the hypothesis that HFNO is better than  
729 usual care.

730

731 *If the study intervention failed to demonstrate non-inferiority*

732       A careful analysis of the reasons for failure to show non-inferiority in 28-day mortality will be  
733 required before concluding that HFNO is potentially inferior. For instance, comparison with the  
734 FLORALI trial will be required.

735       No specific harms associated with HFNO are expected, as the preliminary data show either benefits  
736 [significant decrease in intubation rate and even increase in survival] or neither benefits nor harms.

737

#### 73814. Practical aspects: randomisation

739 Randomisation will be achieved using an electronic system incorporated in the eCRF and R software  
740 [<http://www.R-project.org/>]. The impact of the intervention will be assessed at the patient level. The  
741 randomisation unit is the centre. Randomisation will be centralised on a web site to ensure allocation  
742 concealment at the trial statistical centre.

743

744 Patients will be randomised into two parallel groups, in a 1:1 ratio.

745 Randomisation will be stratified on two factors: hypoxaemia severity ( $\text{PaO}_2/\text{FiO}_2 < 200$  or  $\geq 200$  at  
746 randomisation) and presence or absence of organ dysfunction in addition to the respiratory failure [based  
747 on the SOFA score definition]. This stratification strategy will result in eight different randomisation lists  
748 that will be pre-specified and balanced through the use of permutation blocks of fixed size that will not  
749 be disclosed to the local investigators, to ensure allocation concealment and to avoid all risk of bias in  
750 patient selection.

751

**75215. Number of patients to include in the study (sample size)**

753 We extensively discussed the study design with study-group physicians at our meeting on July 2,  
754 2015; opinion leaders in the field of acute respiratory failure (REVA network); and reviewers of the 2015  
755 PHRC-N [who had commented on this point]. We also based our assumptions on results of the trials by  
756 Ferrer and Stephan.<sup>14, 66</sup> We agree with the PHRC reviewers that the non-inferiority design is the best  
757 option. For all stakeholders, a 9% non-inferiority margin is clinically relevant, based on one-sided  
758 confidence interval of the main outcome.

759 Based on the 26% overall day-28 mortality rate in the iVNIctus trial (usual-care oxygen or NIV)  
760 and a 9% non-inferiority margin, with  $\alpha$  set at 5%, to obtain a 80% power for demonstrating non-  
761 inferiority for the primary outcome, we need 816 patients (408 in each group). Recruitment is expected  
762 to take 24 months, and 6 additional months will be required for follow-up.

763

**76416. Statistical analysis**

765

**766 A. Minimising biases**

767 The most effective design technique for avoiding selection bias and allowing causal inference is  
768 randomisation, centrally performed to ensure allocation concealment. Moreover, to ensure such  
769 concealment, all the investigators will remain unaware of the size of the permutation blocks used in the  
770 generation of lists.

771 To ensure the absence of attrition bias, the primary analysis will be made according to the intention-  
772 to-treat principle.

773 To ensure non-informative right censoring, a reference date for the analysis that achieved so-called  
774 administrative censoring will be used for the analysis of time-to-failure data for all outcomes that could  
775 not be fixed like 28 day mortality.

776 To avoid inflating the type I error rate, baseline characteristics (at randomisation) of the two groups  
777 will be compared roughly, without formal statistical testing.

778

**779 B. Type of comparisons**

780 The main comparison based on the intention-to-treat principle will compare the intervention arm to  
781 the control arm on the full-set of randomized patients. The primary hypothesis is non inferiority of the  
782 NIV in terms of 28-day mortality (primary outcome). For all secondary outcomes, our hypothesis is that  
783 HFNO is superior over standard oxygen or NIV, with two-sided p-values for comparison tests.

784 Secondary and exploratory comparisons of the primary endpoint will look for treatment-by-covariate  
785 interactions according to the subsets defined above.

786 Finally, a per-protocol analysis will be performed (see below) as in non-inferiority designs, non-  
787 inferiority is required in both the ITT and the PP analyses.

788  
789 **C. Interim analyses**

790 No interim analysis will be performed. The final analysis will be started after inclusion of the planned  
791 number of patients.

792  
793 **D. Pre-specification of analyses**

794  
795 **1. Analysis sets**

796 According to the intention-to-treat principle, the full analysis set, that is, the set of patients whose data  
797 are included in the main primary analysis, is composed of all randomised patients except those who  
798 withdraw consent, who are analysed in the arm they were allocated to.

799  
800 **2. Missing values and outliers**

801 Missing values for the main outcome measure are not expected to be observed; nevertheless, in case  
802 of occurrence, they will be handled using time-to-event methods in which each patient contributes to the  
803 estimate of failure time distribution until he/she is lost-to-follow up or withdrawn from the study using  
804 competing-risks estimates.

---

P150912\_nifc-HIGH-Patient\_v1-0-20160212

*Ce document est la propriété du DRCD / APHP. Toute reproduction est formellement interdite.*

Suivant modèle REC-DTYP-0051 version 1 du 14/05/2012

805 Missing values for predictors will be imputed using multiple imputation techniques.

806

### 807 3. *Statistical analysis strategy*

#### 808 Primary outcome

809 The main endpoint is binary, as all patients will be followed until day 28, at which time they will  
810 be classified as alive or dead. The relative risk of hospital death in the experimental versus the control  
811 arm will be estimated to assess the effectiveness of the intervention, with 95% confidence interval.  
812 Analyses adjusted on potential confounders will be performed. Intervention-by-subsets interactions will  
813 be tested using Gail and Simon statistics. In case of significant interaction, subset analyses will be  
814 performed on each subset.

815

#### 816 Secondary outcomes

817 Competing-risk endpoints (ICU-acquired events including intubation, ICU-acquired infection, time  
818 to clear pulmonary infiltrates, reintubation) will be analysed using competing-risk methods. Specifically,  
819 cumulative incidences of the event of interest will be estimated, taking into account the competition  
820 between death or discharge alive from the ICU and the event of interest, then compared using the Gray  
821 test. Adjustment for potential confounders will be based on cause-specific Cox models.

822 ICU length of stay will be analysed overall and in survivors and dead patients, separately. The  
823 former analysis will be based on Kaplan Meier estimate while the later on the competing-risk estimator,  
824 as described above.

825 Analyses of longitudinal outcomes (oxygenation, dyspnea, patient comfort) will be based on joint  
826 models, taking into account the right censoring of the data.

827

828

829 All statistical analyses will be performed using SAS (SAS Inc, Cary, NC, USA) and R  
830 (<http://www.R-project.org/>) software.

831

83217. Ethical issues, administrative aspects, and collected data (electronic Case Report Form, eCRF)

833

834 **A. Data collection**

835 Trained data collectors (clinical research technicians, CRTs) will assess the process-of-care  
836 indicators for all patients in all ICUs, using handheld wireless electronic devices connected to a central  
837 database via a local server (CLEANWEB). Each CRT will collect data in two ICUs. The central co-  
838 ordinating office will provide all CRTs with specific data-collection training for this study. Delivery of  
839 each item of care targeted by our intervention in each patient is defined as presence of at least one process-  
840 of-care indicator and absence of contra-indications to the item of care.

841 Data will be encrypted to ensure confidentiality and collected once daily from Monday through  
842 Friday. On weekends and holidays, data will be collected in real time or on the following workday,  
843 depending on site resources. The co-ordinating centre will conduct an on-site visit and audit of data  
844 collection at each ICU during the trial.

845 Appendix 1 lists the main data to be collected for the study.

846

847 **B. Investigator responsibilities**

848 The investigators will have five main responsibilities.

849 a) Before starting the study in the ICU, the local investigator must inform all members of the ICU  
850 team [physicians and nurses] and referring physicians in the hospital about the study. Thus, patients and  
851 relatives will then be able to seek information from any person involved in the care of the patient.



852 b) The local investigator must screen all immunocompromised patients who are admitted to the ICU  
853 and who need oxygen, to determine whether the study inclusion and exclusion criteria are met. Then, the  
854 local investigator must collect written informed consent from the patient or proxy. The informed consent  
855 document is appendix 2. Eligible patients who are incompetent will be included; as soon as they regain  
856 competence, they will be asked whether they consent to continue participation in the study.

857 c) The local investigator and entire team must provide all patients in both groups with the best  
858 standard of care.

859 d) The local investigator and entire team must make every effort to ensure that the study patients  
860 receive the oxygenation device allocated by the randomisation process.

861 e) The local investigator must ensure that all the study data are carefully collected, ensure that the  
862 CRT can find the data needed to check for accuracy, and fill in missing data.

863  
864 **C. *Monitoring and data quality insurance***

865 Monitoring will be performed by the CRTs of other participating ICUs. Six items will be monitored:

866- Inclusion and exclusion criteria,

867- Informed consent,

868- Need for oxygen,

869- Type of oxygenation device used in the control-group patients (Figure 1),

870- Primary endpoint, and

871- Secondary endpoints.

873 **D. Approval by the ethics committee and regulatory agencies**

874 The project will be submitted to the *Comité de Protection des Personnes* (CPP, ethics committee)  
875 of the Pitié-Salpêtrière Hospital in Paris. It will also be submitted to the *Comité Consultatif sur le*  
876 *Traitement de l'Information en matière de Recherche dans le domaine de la santé* (advisory committee  
877 on healthcare-research data processing, CCTIRS) and the Commission Nationale de l'Informatique et des  
878 Libertés (French data protection authority, CNIL).

879

880 **E. Right to access the database**

881 The database will be handled by, and only by, Prof. Sylvie Chevret, who will be responsible for data  
882 storage, the statistical analysis, and the tables and figures for the study report. She will be in close contact  
883 with the Data Safety and Monitoring Board and with the statistical editors of the journal to which the  
884 study report will be submitted for publication.

885

## 88618. Ethical and safety issues

### 887 A. *General principles*

888 This study will be conducted in accordance with the Declaration of Helsinki, Good Clinical Practice  
889 [GCP] guidelines, and International Conference on Harmonisation [ICH] guidelines. The study is justified  
890 by adequate clinical and laboratory data previously published in peer-reviewed journals, as discussed in  
891 the background section of this project proposal. The study protocol will be reviewed and approved by the  
892 institutional review board of each participating centre. Written informed consent will be obtained from  
893 each patient or proxy before study inclusion.

894 In conformity with the ethical principles that guide clinical critical-care research, the protocol  
895 incorporates measures designed to minimise risks to participants. Reporting of serious adverse events is  
896 described below.

897

### 898 B. *Monitoring of adverse events and complications during the ICU stay*

899

#### 900 **Definitions of adverse events**

901a. An **adverse event** is any untoward medical event occurring during the study.

902b. An **unanticipated adverse event** is any medical event whose nature, severity, or frequency is not  
903 consistent with existing information regarding the risk profile of the study procedures.

904c. A **serious adverse event** is any medical event that results in death, is life threatening, requires in-patient  
905 hospitalization or prolongs existing hospitalization, creates persistent or significant disability or  
906 incapacity, or results in a congenital anomaly or birth defect. An important medical event that may not

---

P150912\_nifc-HIGH-Patient\_v1-0-20160212

*Ce document est la propriété du DRCD / APHP. Toute reproduction est formellement interdite.*

Suivant modèle REC-DTYP-0051 version 1 du 14/05/2012

907 result in death, be life threatening, or require hospitalization may be classified as a serious adverse event  
908 when good medical judgment indicates that medical or surgical intervention is needed to prevent any of  
909 the above-listed outcomes.

910d. An adverse event may be related to the study intervention if it may reasonably be regarded as possibly,  
911 probably, or clearly caused by the intervention. Alternatively, the relationship of adverse events to study  
912 interventions may be characterised as either ‘unrelated’ or ‘unlikely related’.

913e. **Unanticipated problems other than adverse events** include occurrences such as (but not limited to)  
914 accidental overdoses of study medications, deviations from study inclusion/exclusion criteria, or failure  
915 to follow criteria for patient withdrawal.

### 916

### 917 **Reporting of adverse events**

918 Adverse events should be reported only if they are determined by the principal investigator to be  
919 unanticipated; serious; or possibly, probably, or clearly caused by the study intervention [as opposed to  
920 unrelated or unlikely related to the study intervention].

921a. The investigator must report to the local IRB and to the clinical coordinating centre all adverse events,  
922 other than deaths, within 5 working days of their occurrence.

923b. Deaths occurring locally that are unanticipated and are possibly, probably, or clearly caused by the study  
924 intervention must be reported by the investigator to the local IRB and clinical coordinating centre within  
925 24 hours of their occurrence.

926c. The investigator must report to the local IRB and to the clinical coordinating centre all unanticipated  
927 problems other than adverse events within 5 working days of their occurrence.

---

P150912\_nifc-HIGH-Patient\_v1-0-20160212

*Ce document est la propriété du DRCD / APHP. Toute reproduction est formellement interdite.*

Suivant modèle REC-DTYP-0051 version 1 du 14/05/2012

928 The clinical coordinating centre will report all serious, unexpected, and study-related adverse events  
929 to the Data Safety and Monitoring Board, by fax or telephone, within 7 calendar days. A written report  
930 will be sent to the Data Safety and Monitoring Board within 15 calendar days and these reports will be  
931 sent to the investigators for submission to their respective IRBs. The Data Safety and Monitoring Board  
932 will also review all adverse events during scheduled interim analyses. The clinical coordinating centre  
933 will distribute the written summary of the Data Safety and Monitoring Board's periodic review of adverse  
934 events to the investigators for submission to their respective IRBs.

935

936

93719. References

938

- 939 1. Dumas G, Geri G, Montlahuc C, et al. Outcomes in Critically Ill Patients with Systemic Rheumatic  
940 Disease: a multicenter study. Chest 2015;2015(21):14-3098.
- 941 2. Faguer S, Ciroldi M, Mariotte E, et al. Prognostic contributions of the underlying inflammatory  
942 disease and acute organ dysfunction in critically ill patients with systemic rheumatic diseases. Eur J Intern  
943 Med 2013;24(3):e40-4.
- 944 3. Soares M, Toffart AC, Timsit JF, et al. Intensive care in patients with lung cancer: a multinational  
945 study. Ann Oncol 2014;25(9):1829-35.
- 946 4. Azoulay E, Lemiale V, Mokart D, et al. Acute respiratory distress syndrome in patients with  
947 malignancies. Intensive Care Med 2014;40(8):1106-14.
- 948 5. Azoulay E, Pene F, Darmon M, et al. Managing critically Ill hematology patients: Time to think  
949 differently. Blood Rev 2015;2015(26):00030-2.
- 950 6. Canet E, Osman D, Lambert J, et al. Acute respiratory failure in kidney transplant recipients: a  
951 multicenter study. Crit Care 2011;15(2):R91.
- 952 7. Murphy G, Lisnevskaja L, Isenberg D. Systemic lupus erythematosus and other autoimmune  
953 rheumatic diseases: challenges to treatment. Lancet 2013;382(9894):809-18.
- 954 8. Guillevin L, Pagnoux C, Karras A, et al. Rituximab versus azathioprine for maintenance in  
955 ANCA-associated vasculitis. N Engl J Med 2014;371(19):1771-80.
- 956 9. Hilbert G, Gruson D, Vargas F, et al. Noninvasive ventilation in immunosuppressed patients with  
957 pulmonary infiltrates, fever, and acute respiratory failure. N Engl J Med 2001;344(7):481-7.

---

P150912\_nifc-HIGH-Patient\_v1-0-20160212

*Ce document est la propriété du DRCD / APHP. Toute reproduction est formellement interdite.*

Suivant modèle REC-DTYP-0051 version 1 du 14/05/2012

- 958 10. Azoulay E, Mokart D, Lambert J, et al. Diagnostic strategy for hematology and oncology patients  
959 with acute respiratory failure: randomized controlled trial. *Am J Respir Crit Care Med* 2010;182(8):1038-  
960 46.
- 961 11. Mokart D, Lambert J, Schnell D, et al. Delayed intensive care unit admission is associated with  
962 increased mortality in patients with cancer with acute respiratory failure. *Leuk Lymphoma*  
963 2013;54(8):1724-9.
- 964 12. Dewan NA, Bell CW. Effect of low flow and high flow oxygen delivery on exercise tolerance and  
965 sensation of dyspnea. A study comparing the transtracheal catheter and nasal prongs. *Chest*  
966 1994;105(4):1061-5.
- 967 13. Frat JP, Thille AW, Mercat A, et al. High-flow oxygen through nasal cannula in acute hypoxemic  
968 respiratory failure. *N Engl J Med* 2015;372(23):2185-96.
- 969 14. Stephan F, Barrucand B, Petit P, et al. High-Flow Nasal Oxygen vs Noninvasive Positive Airway  
970 Pressure in Hypoxemic Patients After Cardiothoracic Surgery: A Randomized Clinical Trial. *Jama*  
971 2015;313(23):2331-9.
- 972 15. Campbell EJ, Baker MD, Crites-Silver P. Subjective effects of humidification of oxygen for  
973 delivery by nasal cannula. A prospective study. *Chest* 1988;93(2):289-93.
- 974 16. Chanques G, Constantin JM, Sauter M, et al. Discomfort associated with underhumidified high-  
975 flow oxygen therapy in critically ill patients. *Intensive Care Med* 2009;35(6):996-1003.
- 976 17. Wettstein RB, Shelledy DC, Peters JI. Delivered oxygen concentrations using low-flow and high-  
977 flow nasal cannulas. *Respir Care* 2005;50(5):604-9.

---

P150912\_nifc-HIGH-Patient\_v1-0-20160212

*Ce document est la propriété du DRCD / APHP. Toute reproduction est formellement interdite.*

Suivant modèle REC-DTYP-0051 version 1 du 14/05/2012

- 978 18. Wagstaff TA, Soni N. Performance of six types of oxygen delivery devices at varying respiratory  
979 rates. *Anaesthesia* 2007;62(5):492-503.
- 980 19. Vargas F, Saint-Leger M, Boyer A, Bui NH, Hilbert G. Physiologic Effects of High-Flow Nasal  
981 Cannula Oxygen in Critical Care Subjects. *Respir Care* 2015;2015(5):03814.
- 982 20. Itagaki T, Okuda N, Tsunano Y, et al. Effect of high-flow nasal cannula on thoraco-abdominal  
983 synchrony in adult critically ill patients. *Respir Care* 2014;59(1):70-4.
- 984 21. Corley A, Caruana LR, Barnett AG, Tronstad O, Fraser JF. Oxygen delivery through high-flow  
985 nasal cannulae increase end-expiratory lung volume and reduce respiratory rate in post-cardiac surgical  
986 patients. *Br J Anaesth* 2011;107(6):998-1004.
- 987 22. Sztrymf B, Messika J, Bertrand F, et al. Beneficial effects of humidified high flow nasal oxygen  
988 in critical care patients: a prospective pilot study. *Intensive Care Med* 2011;37(11):1780-6.
- 989 23. Sztrymf B, Messika J, Mayot T, Lenglet H, Dreyfuss D, Ricard JD. Impact of high-flow nasal  
990 cannula oxygen therapy on intensive care unit patients with acute respiratory failure: a prospective  
991 observational study. *J Crit Care* 2012;27(3):324 e9-13.
- 992 24. Dysart K, Miller TL, Wolfson MR, Shaffer TH. Research in high flow therapy: mechanisms of  
993 action. *Respir Med* 2009;103(10):1400-5.
- 994 25. Parke RL, Eccleston ML, McGuinness SP. The effects of flow on airway pressure during nasal  
995 high-flow oxygen therapy. *Respir Care* 2011;56(8):1151-5.
- 996 26. Berk JL, Lenner KA, McFadden ER, Jr. Cold-induced bronchoconstriction: role of cutaneous  
997 reflexes vs. direct airway effects. *J Appl Physiol* (1985) 1987;63(2):659-64.

---

P150912\_nifc-HIGH-Patient\_v1-0-20160212

*Ce document est la propriété du DRCD / APHP. Toute reproduction est formellement interdite.*

Suivant modèle REC-DTYP-0051 version 1 du 14/05/2012



- 998 27. Fontanari P, Burnet H, Zattara-Hartmann MC, Jammes Y. Changes in airway resistance induced  
999 by nasal inhalation of cold dry, dry, or moist air in normal individuals. J Appl Physiol (1985)  
000 1996;81(4):1739-43.
- 001 28. Chikata Y, Izawa M, Okuda N, et al. Humidification performance of two high-flow nasal cannula  
002 devices: a bench study. Respir Care 2014;59(8):1186-90.
- 003 29. Salah B, Dinh Xuan AT, Fouilladieu JL, Lockhart A, Regnard J. Nasal mucociliary transport in  
004 healthy subjects is slower when breathing dry air. Eur Respir J 1988;1(9):852-5.
- 005 30. Negus VE. Humidification of the air passages. Thorax 1952;7(2):148-51.
- 006 31. Chanques G, Riboulet F, Molinari N, et al. Comparison of three high flow oxygen therapy delivery  
007 devices: a clinical physiological cross-over study. Minerva Anesthesiol 2013;79(12):1344-55.
- 008 32. Greenspan JS, Wolfson MR, Shaffer TH. Airway responsiveness to low inspired gas temperature  
009 in preterm neonates. J Pediatr 1991;118(3):443-5.
- 010 33. Groves DS, Durbin CG, Jr. Tracheostomy in the critically ill: indications, timing and techniques.  
011 Curr Opin Crit Care 2007;13(1):90-7.
- 012 34. Parke R, McGuinness S, Eccleston M. Nasal high-flow therapy delivers low level positive airway  
013 pressure. Br J Anaesth 2009;103(6):886-90.
- 014 35. Locke RG, Wolfson MR, Shaffer TH, Rubenstein SD, Greenspan JS. Inadvertent administration  
015 of positive end-distending pressure during nasal cannula flow. Pediatrics 1993;91(1):135-8.
- 016 36. Ritchie JE, Williams AB, Gerard C, Hockey H. Evaluation of a humidified nasal high-flow oxygen  
017 system, using oxygraphy, capnography and measurement of upper airway pressures. Anaesth Intensive  
018 Care 2011;39(6):1103-10.

---

P150912\_nifc-HIGH-Patient\_v1-0-20160212

*Ce document est la propriété du DRCD / APHP. Toute reproduction est formellement interdite.*

Suivant modèle REC-DTYP-0051 version 1 du 14/05/2012

- 019 37. Volsko TA, Fedor K, Amadei J, Chatburn RL. High flow through a nasal cannula and CPAP effect  
020 in a simulated infant model. *Respir Care* 2011;56(12):1893-900.
- 021 38. Riera J, Perez P, Cortes J, Roca O, Masclans JR, Rello J. Effect of high-flow nasal cannula and  
022 body position on end-expiratory lung volume: a cohort study using electrical impedance tomography.  
023 *Respir Care* 2013;58(4):589-96.
- 024 39. Corley A, Bull T, Spooner AJ, Barnett AG, Fraser JF. Direct extubation onto high-flow nasal  
025 cannulae post-cardiac surgery versus standard treatment in patients with a BMI  $\geq 30$ : a randomised  
026 controlled trial. *Intensive Care Med* 2015;41(5):887-94.
- 027 40. Maggiore SM, Idone FA, Vaschetto R, et al. Nasal high-flow versus Venturi mask oxygen therapy  
028 after extubation. Effects on oxygenation, comfort, and clinical outcome. *Am J Respir Crit Care Med*  
029 2014;190(3):282-8.
- 030 41. Vourc'h M, Asfar P, Volteau C, et al. High-flow nasal cannula oxygen during endotracheal  
031 intubation in hypoxemic patients: a randomized controlled clinical trial. *Intensive Care Med*  
032 2015;2015:14.
- 033 42. Kang BJ, Koh Y, Lim CM, et al. Failure of high-flow nasal cannula therapy may delay intubation  
034 and increase mortality. *Intensive Care Med* 2015;41(4):623-32.
- 035 43. Messika J, Ben Ahmed K, Gaudry S, et al. Use of High-Flow Nasal Cannula Oxygen Therapy in  
036 Subjects With ARDS: A 1-Year Observational Study. *Respir Care* 2015;60(2):162-9.
- 037 44. Parke R, McGuinness S, Dixon R, Jull A. Open-label, phase II study of routine high-flow nasal  
038 oxygen therapy in cardiac surgical patients. *Br J Anaesth* 2013;111(6):925-31.

---

P150912\_nifc-HIGH-Patient\_v1-0-20160212

*Ce document est la propriété du DRCD / AHP. Toute reproduction est formellement interdite.*

Suivant modèle REC-DTYP-0051 version 1 du 14/05/2012

- 039 45. Lucangelo U, Vassallo FG, Marras E, et al. High-flow nasal interface improves oxygenation in  
040 patients undergoing bronchoscopy. Crit Care Res Pract 2012;2012(506382):506382.
- 041 46. Simon M, Braune S, Frings D, Wiontzek AK, Klose H, Kluge S. High-flow nasal cannula oxygen  
042 versus non-invasive ventilation in patients with acute hypoxaemic respiratory failure undergoing flexible  
043 bronchoscopy--a prospective randomised trial. Crit Care 2014;18(6):712.
- 044 47. Parke RL, McGuinness SP. Pressures delivered by nasal high flow oxygen during all phases of  
045 the respiratory cycle. Respir Care 2013;58(10):1621-4.
- 046 48. Roca O, Riera J, Torres F, Masclans JR. High-flow oxygen therapy in acute respiratory failure.  
047 Respir Care 2010;55(4):408-13.
- 048 49. Rello J, Perez M, Roca O, et al. High-flow nasal therapy in adults with severe acute respiratory  
049 infection: a cohort study in patients with 2009 influenza A/H1N1v. J Crit Care 2012;27(5):434-9.
- 050 50. Nagata K, Morimoto T, Fujimoto D, et al. Efficacy of High-Flow Nasal Cannula Therapy in Acute  
051 Hypoxemic Respiratory Failure: Decreased Use of Mechanical Ventilation. Respir Care  
052 2015;2015(23):04026.
- 053 51. Lenglet H, Sztrymf B, Leroy C, Brun P, Dreyfuss D, Ricard JD. Humidified high flow nasal  
054 oxygen during respiratory failure in the emergency department: feasibility and efficacy. Respir Care  
055 2013;57(11):1873-8.
- 056 52. Rittayamai N, Tscheikuna J, Praphruetkit N, Kijpinyochai S. Use of High-Flow Nasal Cannula for  
057 Acute Dyspnea and Hypoxemia in the Emergency Department. Respir Care 2015;2015(9):03837.

- 058 53. Futier E, Paugam-Burtz C, Constantin JM, Pereira B, Jaber S. The OPERA trial - comparison of  
059 early nasal high flow oxygen therapy with standard care for prevention of postoperative hypoxemia after  
060 abdominal surgery: study protocol for a multicenter randomized controlled trial. *Trials* 2013;14(341):341.
- 061 54. Miguel-Montanes R, Hajage D, Messika J, et al. Use of high-flow nasal cannula oxygen therapy  
062 to prevent desaturation during tracheal intubation of intensive care patients with mild-to-moderate  
063 hypoxemia. *Crit Care Med* 2015;43(3):574-83.
- 064 55. Tiruvoipati R, Lewis D, Haji K, Botha J. High-flow nasal oxygen vs high-flow face mask: a  
065 randomized crossover trial in extubated patients. *J Crit Care* 2010;25(3):463-8.
- 066 56. Brotfain E, Zlotnik A, Schwartz A, et al. Comparison of the effectiveness of high flow nasal  
067 oxygen cannula vs. standard non-rebreather oxygen face mask in post-extubation intensive care unit  
068 patients. *Isr Med Assoc J* 2014;16(11):718-22.
- 069 57. Lee HY, Rhee CK, Lee JW. Feasibility of high-flow nasal cannula oxygen therapy for acute  
070 respiratory failure in patients with hematologic malignancies: A retrospective single-center study. *J Crit*  
071 *Care* 2015;30(4):773-7.
- 072 58. Epstein AS, Hartridge-Lambert SK, Ramaker JS, Voigt LP, Portlock CS. Humidified high-flow  
073 nasal oxygen utilization in patients with cancer at Memorial Sloan-Kettering Cancer Center. *J Palliat Med*  
074 2011;14(7):835-9.
- 075 59. Hui D, Morgado M, Chisholm G, et al. High-flow oxygen and bilevel positive airway pressure for  
076 persistent dyspnea in patients with advanced cancer: a phase II randomized trial. *J Pain Symptom Manage*  
077 2013;46(4):463-73.

- .078 60. Roca O, de Acilu MG, Caralt B, Sacanell J, Masclans JR. Humidified high flow nasal cannula  
.079 supportive therapy improves outcomes in lung transplant recipients readmitted to the intensive care unit  
.080 because of acute respiratory failure. *Transplantation* 2015;99(5):1092-8.
- .081 61. Peters SG, Holets SR, Gay PC. High-flow nasal cannula therapy in do-not-intubate patients with  
.082 hypoxemic respiratory distress. *Respir Care* 2013;58(4):597-600.
- .083 62. Mokart D, Geay C, Chow-Chine L, et al. High-flow oxygen therapy in cancer patients with acute  
.084 respiratory failure. *Intensive Care Med* 2015;2015:4.
- .085 63. Lemiale V, Resche-Rigon M, Azoulay E. Early non-invasive ventilation for acute respiratory  
.086 failure in immunocompromised patients (IVNIctus): study protocol for a multicenter randomized  
.087 controlled trial. *Trials* 2015;15(372):372.
- .088 64. Shih WJ, Quan H, Li G. Two-stage adaptive strategy for superiority and non-inferiority  
.089 hypotheses in active controlled clinical trials. *Stat Med* 2004;23(18):2781-98.
- .090 65. Kaji AH, Lewis RJ. Noninferiority trials: is a new treatment almost as effective as another? *JAMA*  
.091 2015;313(23):2371-2.
- .092 66. Ferrer M, Valencia M, Nicolas JM, Bernadich O, Badia JR, Torres A. Early noninvasive  
.093 ventilation averts extubation failure in patients at risk: a randomized trial. *Am J Respir Crit Care Med*  
.094 2006;173(2):164-70.
- .095

**FINAL PROTOCOL (Submitted to the IRB)**

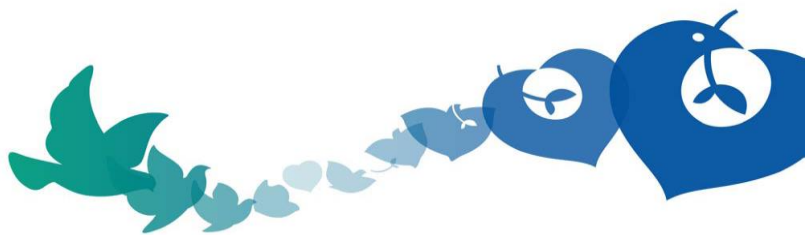

**Comparaison de deux modalités d'administration de l'oxygène chez les patients  
immunodéprimés de réanimation: oxygène à haut débit humidifié versus traitement  
conventionnel "HIGH"**

**P150912 - IDRCB N°: 2016-A00220-51**

**Cette recherche est organisée par l'Assistance Publique - Hôpitaux de Paris**

**Département de la Recherche Clinique et du Développement**

**1 avenue Claude Vellefaux**

**75010 Paris**

---

P150912\_nifc-HIGH-Patient\_v1-0-20160212

*Ce document est la propriété du DRCD / AHP. Toute reproduction est formellement interdite.*

Suivant modèle REC-DTYP-0051 version 1 du 14/05/2012

NOTE D'INFORMATION – PATIENT

**Madame, Monsieur,**

Le Docteur..... (nom, prénom), exerçant à l'hôpital ....., vous propose de participer à une recherche biomédical intitulée : « **Comparaison de deux modalités d'administration de l'oxygène chez les patients immunodéprimés de réanimation: oxygène à haut débit humidifié versus traitement conventionnel** ». Il est important de lire attentivement cette note avant de décider si vous allez participer à cette recherche ; n'hésitez pas à demander des explications à votre médecin.

Si vous décidez de participer à cette recherche, un consentement écrit vous sera demandé.

**1) Quel est le but de cette recherche?**

Cette recherche porte sur la prise en charge des patients immunodéprimés admis en réanimation avec un problème respiratoire nécessitant de l'oxygène. Elle propose d'évaluer si l'utilisation de l'oxygène à haut débit humidifié est supérieure à la prise en charge habituelle (oxygène standard).

En effet, des travaux récents ont montré qu'il y avait des avantages théoriques à apporter de l'oxygène à haut débit humidifié (confort, tolérance, efficacité, prévention de l'aggravation respiratoire), mais cela n'a pas été démontré chez des patients dans votre situation.

134

135 Pour répondre à la question posée dans la recherche, il est prévu d'inclure 778 personnes présentant une insuffisance  
136 respiratoire aiguë dans des établissements de soin situés dans toute la France.  
137

138 **2) En quoi consiste la recherche ?**  
139

140 Dans la recherche proposée, nous allons évaluer si l'utilisation de l'oxygène à haut débit humidifié chez les patients  
141 immunodéprimés admis en réanimation est supérieure à la prise en charge habituelle (O<sub>2</sub> de faible ou moyen débit) concernant  
142 la mortalité à J28. Vous bénéficierez *par tirage au sort soit* de l'oxygène à haut débit humidifié (HFNO) *soit de la* prise en charge  
143 habituelle (O<sub>2</sub> de faible ou moyen débit).  
144

145 **3) Quel est le calendrier de la recherche ?**  
146

147 La recherche durera *30 mois* en tout, et votre participation sera de *6 mois*. L'étude commencera après la signature de  
148 votre consentement.  
149

150

151

152

153 **4) Quels sont les bénéfices et les contraintes liés à votre participation ?**

---

P150912\_nifc-HIGH-Patient\_v1-0-20160212

*Ce document est la propriété du DRCD / APHP. Toute reproduction est formellement interdite.*

Suivant modèle REC-DTYP-0051 version 1 du 14/05/2012



- 154 - *Aucun bénéfice direct n'est attendu, mais en participant à cette recherche, vous bénéficierez d'un suivi médical étroit*  
155 *et spécifique pour lequel aucun frais supplémentaire ne vous sera demandé. Par ailleurs, vous contribuerez à une*  
156 *meilleure connaissance sur le bénéfice de l'utilisation de l'oxygène à haut débit humidifié.*  
157 - *Lors de cette recherche vous aurez en plus de la prise en charge normale un prélèvement nasal par écouvillon et un*  
158 *prélèvement de sang (1 tube de 10 ml) pour aider à la recherche des causes de votre insuffisance respiratoire*  
159

160 Si vous acceptez de participer, vous devrez respecter les points suivants :

- 161 - Informer le médecin de la recherche, de l'utilisation de tout médicament ainsi que de tout événement survenant  
162 pendant la recherche,  
163 - Ne pas prendre part à un autre projet de recherche sans l'accord de votre médecin, ceci pour vous protéger de tout  
164 accident possible pouvant résulter par exemple d'incompatibilités possibles ou d'autres dangers,  
165 - Etre affilié(e) à un régime de sécurité sociale ou être bénéficiaire d'un tel régime.  
166

167  
168 **5) Quels sont les risques prévisibles de la recherche?**  
169

170 Aucun événement indésirable grave lié aux actes, procédures ou examens spécifiques de la recherche n'est attendu.  
171  
172

173 **6) Quelles sont les éventuelles alternatives médicales?**  
174

175 La prise en charge sera identique à la normale hormis un *prélèvement nasal par écouvillon et un prélèvement de sang (1*  
176 *tube de 10 ml)*. La participation à la recherche ne rajoute pas plus de contrainte.  
177

---

P150912\_nifc-HIGH-Patient\_v1-0-20160212

*Ce document est la propriété du DRCD / APHP. Toute reproduction est formellement interdite.*

Suivant modèle REC-DTYP-0051 version 1 du 14/05/2012

178 **7) Quelles sont les modalités de prise en charge médicale à la fin de votre participation?**  
179

180 La prise en charge à la fin de la recherche sera identique à la normale. Votre médecin pourra décider à tout moment de  
181 l'arrêt de votre participation si besoin ; il vous en expliquera les raisons.  
182

183 **8) Si vous participez, que vont devenir les données recueillies pour la recherche ?**  
184

185 Dans le cadre de la recherche biomédicale à laquelle l'AP-HP vous propose de participer, un traitement de vos données  
186 personnelles va être mis en oeuvre pour permettre d'analyser les résultats de la recherche au regard de l'objectif de cette  
187 dernière qui vous a été présenté.

188 A cette fin, les données médicales vous concernant *seront transmises au Promoteur de la recherche ou aux personnes ou*  
189 *sociétés agissant pour son compte, en France.* Ces données seront identifiées par un numéro de code et vos initiales. Ces  
190 données pourront également, dans des conditions assurant leur confidentialité, être transmises aux autorités de santé  
191 françaises.

192 Pour tout arrêt de participation sans retrait de consentement, les données recueillies précédemment à cet arrêt seront  
193 utilisées sauf si vous ne le souhaitez pas.  
194

195 **9) Comment cette recherche est-elle encadrée ?**  
196

197 L'AP-HP a souscrit une assurance (N° d'adhésion) garantissant sa responsabilité civile et celle de tout intervenant auprès  
198 de la compagnie HDI-GERLING par l'intermédiaire de BIOMEDICINSURE dont l'adresse est Parc d'Innovation Bretagne Sud  
199 C.P.142 56038 Vannes Cedex.

201 L'AP-HP a pris toutes les dispositions prévues par la loi relative à la protection des personnes se prêtant à des recherches  
202 biomédicales, loi Huriet (n° 88-1138) du 20 décembre 1988 modifiée par la loi de santé publique (n° 2004-806) du 9 août 2004.

204 L'AP-HP a obtenu l'avis favorable du Comité de Protection des Personnes pour cette recherche de l'hôpital Saint Louis le  
205 [indiquer la date de la séance au format jj /mm /aaaa] et une autorisation de l'Agence Nationale de Sécurité du Médicament et  
206 des produits de santé (ANSM).

## 209 10) Quels sont vos droits ?

210

211 Votre participation à cette recherche est entièrement libre et volontaire. Votre décision n'entraînera aucun préjudice sur la  
212 qualité des soins et des traitements que vous êtes en droit d'attendre.

214 Vous pourrez tout au long de la recherche demander des explications sur le déroulement de la recherche au médecin qui  
215 vous suit.

---

P150912\_nifc-HIGH-Patient\_v1-0-20160212

*Ce document est la propriété du DRCD / APHP. Toute reproduction est formellement interdite.*

Suivant modèle REC-DTYP-0051 version 1 du 14/05/2012

.216

.217 Vous pouvez vous retirer à tout moment de la recherche sans justification, sans conséquence sur la suite de votre  
.218 traitement ni la qualité des soins qui vous seront fournis et sans conséquence sur la relation avec votre médecin. A l'issue de  
.219 ce retrait, vous pourrez être suivi par la même équipe médicale.

.220

.221 Conformément aux dispositions de la CNIL (loi relative à l'informatique, aux fichiers et aux libertés), vous disposez d'un  
.222 droit d'accès et de rectification. Vous disposez également d'un droit d'opposition à la transmission des données couvertes par  
.223 le secret professionnel susceptibles d'être utilisées dans le cadre de cette recherche et d'être traitées. Ces droits s'exercent  
.224 auprès du médecin en charge de la recherche qui seul connaît votre identité. Vous pouvez également accéder directement ou  
.225 par l'intermédiaire d'un médecin de votre choix à l'ensemble de vos données médicales en application des dispositions de  
.226 l'article L 1111-7 du Code de la Santé Publique.

.227

.228 Votre dossier médical restera confidentiel et ne pourra être consulté que sous la responsabilité du médecin s'occupant de  
.229 votre traitement ainsi que par les autorités de santé et par des personnes dûment mandatées par l'AP-HP pour la recherche et  
.230 soumises au secret professionnel.

.231

.232 A l'issue de la recherche et après analyse des données relatives à cette recherche, vous pourrez être informé(e) des  
.233 résultats globaux par l'intermédiaire du médecin qui vous suit dans le cadre de cette recherche.

.234

---

P150912\_nifc-HIGH-Patient\_v1-0-20160212

*Ce document est la propriété du DRCD / APHP. Toute reproduction est formellement interdite.*

Suivant modèle REC-DTYP-0051 version 1 du 14/05/2012

.235 Si vous acceptez de participer à la recherche après avoir lu toutes ces informations et discuté tous les aspects avec votre  
.236 médecin, vous devrez signer et dater le formulaire de consentement éclairé se trouvant à la fin de ce document.

1237

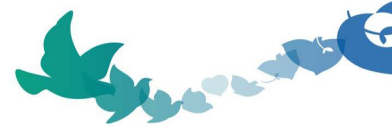

1238

1239

## FORMULAIRE DE CONSENTEMENT

1240

### « PATIENT »

1241

1242 Je soussigné(e), M<sup>me</sup>, M. [rayer les mentions inutiles] (nom,  
1243 prénom).....

1244 accepte librement de participer à la recherche intitulée : « Comparaison de deux modalités  
1245 d'administration de l'oxygène chez les patients immunodéprimés de réanimation: oxygène à haut débit  
1246 humidifié versus traitement conventionnel » organisée par l'Assistance Publique - Hôpitaux de Paris et qui m'est  
1247 proposée par le Docteur (nom, prénom,  
1248 téléphone)....., médecin dans cette recherche.

1249

1250 - J'ai pris connaissance de la note d'information version 1.0 du 12-02-2016 de 3 pages, m'expliquant l'objectif de  
1251 cette recherche, la façon dont elle va être réalisée et ce que ma participation va impliquer,

1252 - je conserverai un exemplaire de la note d'information et du consentement,

1253 - j'ai reçu des réponses adaptées à toutes mes questions,

1254 - j'ai disposé d'un temps suffisant pour prendre ma décision,

1255 - j'ai compris que ma participation est libre et que je pourrai interrompre ma participation à tout moment, sans encourir  
1256 la moindre responsabilité et préjudice pour la qualité des soins qui me seront prodigués. J'indiquerai alors au  
1257 médecin qui me suit, si je souhaite ou non que les données recueillies, jusqu'au moment de ma décision, soient  
1258 utilisées,

1259 - Je suis conscient(e) que ma participation pourra aussi être interrompue par le médecin si besoin,

1260 - avant de participer à cette recherche, j'ai bénéficié d'un examen médical adapté à la recherche, dont les résultats  
1261 m'ont été communiqués,

1262 - j'ai compris que pour pouvoir participer à cette recherche je dois être affilié(e) à un régime de sécurité sociale ou  
1263 bénéficiaire d'un tel régime. Je confirme que c'est le cas,

1264 - j'ai bien été informé(e) que ma participation à cette recherche durera 6 mois et que cela implique que je ne pourrai  
1265 pas envisager de participer à une autre recherche sans en informer le médecin qui me suit pour la recherche,

1266 - mon consentement ne décharge en rien le médecin qui me suit dans le cadre de la recherche ni l'AP-HP de  
1267 l'ensemble de leurs responsabilités et je conserve tous mes droits garantis par la loi.

1268

**Signature de la personne participant à la  
recherche**

**Signature du médecin**

Nom Prénom :

Nom Prénom :

Date :

Signature :

Date :

Signature :

1269

1270

1271

1272

1273



1274

1275

1276

1277

1278

1279

1280

1281

1282

1283

1284

1285

1286

1287

1288

1289

1290

1291           Ce document est à réaliser en 3 exemplaires, dont l'original doit être conservé **15 ans** par l'investigateur, le deuxième remis  
1292 à la personne donnant son consentement et le troisième transmis à l'AP-HP sous enveloppe scellée à la fin de la recherche.

1293

1294 **Original statistical plan**

1295 **4. *Statistical analysis strategy***

1296 Primary outcome

1297 The main endpoint is binary, as all patients will be followed until day 28, at which time  
1298 they will be classified as alive or dead. The relative risk of hospital death in the experimental  
1299 versus the control arm will be estimated to assess the effectiveness of the intervention, with  
1300 95% confidence interval. Analyses adjusted on potential confounders will be performed.  
1301 Intervention-by-subsets interactions will be tested using Gail and Simon statistics. In case of  
1302 significant interaction, subset analyses will be performed on each subset.

1303

1304 Secondary outcomes

1305 Competing-risk endpoints (ICU-acquired events including intubation, ICU-acquired  
1306 infection, time to clear pulmonary infiltrates, reintubation) will be analysed using competing-  
1307 risk methods. Specifically, cumulative incidences of the event of interest will be estimated,  
1308 taking into account the competition between death or discharge alive from the ICU and the  
1309 event of interest, then compared using the Gray test. Adjustment for potential confounders will  
1310 be based on cause-specific Cox models.

1311 ICU length of stay will be analysed overall and in survivors and dead patients, separately.  
1312 The former analysis will be based on Kaplan Meier estimate while the later on the competing-  
1313 risk estimator, as described above.

1314 Analyses of longitudinal outcomes (oxygenation, dyspnea, patient comfort) will be based  
1315 on joint models, taking into account the right censoring of the data.

1316

1317

1318 All statistical analyses will be performed using SAS (SAS Inc, Cary, NC, USA) and R  
1319 (<http://www.R-project.org/>) software.  
1320

1321 **Published statistical plan on TRIALS (2018) 19:157**

Azoulay et al. *Trials* (2018) 19:157  
<https://doi.org/10.1186/s13063-018-2492-z>

Trials

STUDY PROTOCOL

Open Access

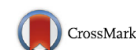

# High-flow nasal oxygen vs. standard oxygen therapy in immunocompromised patients with acute respiratory failure: study protocol for a randomized controlled trial

Elie Azoulay<sup>1\*</sup> , Virginie Lemiale<sup>1</sup>, Djamel Mokart<sup>2</sup>, Saad Nseir<sup>3</sup>, Laurent Argaud<sup>4</sup>, Frédéric Pène<sup>5</sup>, Loay Kontar<sup>6</sup>, Fabrice Bruneel<sup>7</sup>, Kada Klouche<sup>8</sup>, François Barbier<sup>9</sup>, Jean Reignier<sup>10</sup>, Anabelle Stoclin<sup>11</sup>, Guillaume Louis<sup>12</sup>, Jean-Michel Constantin<sup>13</sup>, Julien Mayaux<sup>14</sup>, Florent Wallet<sup>15</sup>, Achille Kouatchet<sup>16</sup>, Vincent Peigne<sup>17</sup>, Pierre Perez<sup>18</sup>, Christophe Girault<sup>19</sup>, Samir Jaber<sup>20</sup>, Johanna Oziel<sup>21</sup>, Martine Nyunga<sup>22</sup>, Nicolas Terzi<sup>23</sup>, Lila Bouadma<sup>24</sup>, Christine Lebert<sup>25</sup>, Alexandre Lautrette<sup>26</sup>, Naïke Bigé<sup>27</sup>, Jean-Herlé Raphalen<sup>28</sup>, Laurent Papazian<sup>29</sup>, Antoine Rabbat<sup>30</sup>, Michael Darmon<sup>31</sup>, Sylvie Chevret<sup>32</sup> and Alexandre Demoule<sup>14</sup>

1322

1323 **High-Flow Nasal Oxygen vs. Standard Oxygen Therapy in Immunocompromised**  
1324 **Patients with Acute Respiratory Failure: Study Protocol for a Randomized Controlled**  
1325 **Trial**

1326 Elie Azoulay (1), [elie.azoulay@aphp.fr](mailto:elie.azoulay@aphp.fr)

1327 Virginie Lemiale (1), [virginie.lemiale@aphp.fr](mailto:virginie.lemiale@aphp.fr)

1328 Djamel Mokart (2), [mokartd@ipc.unicancer.fr](mailto:mokartd@ipc.unicancer.fr)

1329 Saad Nseir (3), [Saadalla.NSEIR@CHRU-LILLE.FR](mailto:Saadalla.NSEIR@CHRU-LILLE.FR)

1330 Laurent Argaud (4), [Laurent.argaud@chu-lyon.fr](mailto:Laurent.argaud@chu-lyon.fr)

1331 Frédéric Pène (5), [Frederic.pene@aphp.fr](mailto:Frederic.pene@aphp.fr)

1332 Loay Kontar (6), [Kontar.Loay@chu-amiens.fr](mailto:Kontar.Loay@chu-amiens.fr);

1333 Fabrice Bruneel (7), [fbruneel@ch-versailles.fr](mailto:fbruneel@ch-versailles.fr)

1334 Kada Klouche (8), [k-klouche@chu-montpellier.fr](mailto:k-klouche@chu-montpellier.fr)

- 1335 François Barbier (9), [Francois.barbier@chr-orleans.fr](mailto:Francois.barbier@chr-orleans.fr)
- 1336 Jean Reignier (10), [jean.reignier@chu-nantes.fr](mailto:jean.reignier@chu-nantes.fr)
- 1337 Anabelle Stoclin (11), [anabelle.stoclin@gustaveroussy.fr](mailto:anabelle.stoclin@gustaveroussy.fr)
- 1338 Guillaume Louis (12), [g.louis@chr-metz-thionville.fr](mailto:g.louis@chr-metz-thionville.fr)
- 1339 Jean-Michel Constantin (13), [jmconstantin@chu-clermontferrand.fr](mailto:jmconstantin@chu-clermontferrand.fr)
- 1340 Julien Mayaux (14), [Julien.mayaux@aphp.fr](mailto:Julien.mayaux@aphp.fr)
- 1341 Florent Wallet (15), [florent.wallet@chu-lyon.fr](mailto:florent.wallet@chu-lyon.fr)
- 1342 Achille Kouatchet (16), [AcKouatchet@chu-angers.fr](mailto:AcKouatchet@chu-angers.fr)
- 1343 Vincent Peigne (17), [vincent.peigne@ch-metropole-savoie.fr](mailto:vincent.peigne@ch-metropole-savoie.fr)
- 1344 Pierre Perez (18), [p.perez@chu-nancy.fr](mailto:p.perez@chu-nancy.fr)
- 1345 Christophe Girault (19), [Christophe.Girault@chu-rouen.fr](mailto:Christophe.Girault@chu-rouen.fr)
- 1346 Samir Jaber (20), [s-jaber@chu-montpellier.fr](mailto:s-jaber@chu-montpellier.fr)
- 1347 Johanna Oziel (21), [johanna.oziel@aphp.fr](mailto:johanna.oziel@aphp.fr)
- 1348 Martine Nyunga (22), [Martine.nyunga@ch-roubaix.fr](mailto:Martine.nyunga@ch-roubaix.fr)
- 1349 Nicolas Terzi (23), [nterzi@chu-grenoble.fr](mailto:nterzi@chu-grenoble.fr)
- 1350 Lila Bouadma (24), [lila.bouadma@aphp.fr](mailto:lila.bouadma@aphp.fr)
- 1351 Christine Lebert (25), [christine.lebert@chd-vendee.fr](mailto:christine.lebert@chd-vendee.fr)
- 1352 Alexandre Lautrette (26), [alautrette@chu-clermontferrand.fr](mailto:alautrette@chu-clermontferrand.fr)
- 1353 Naïke Bigé (27), [naïke.bige@aphp.fr](mailto:naïke.bige@aphp.fr)
- 1354 Jean-Herlé Raphalen (28), [jh.raphalen@hotmail.fr](mailto:jh.raphalen@hotmail.fr)
- 1355 Laurent Papazian (29), [laurent.papazian@ap-hm.fr](mailto:laurent.papazian@ap-hm.fr)

- 1356 Antoine Rabbat (30), [antoine.rabbat@aphp.fr](mailto:antoine.rabbat@aphp.fr)
- 1357 Michael Darmon (31), [Michael.darmon@aphp.fr](mailto:Michael.darmon@aphp.fr)
- 1358 Sylvie Chevret (32), [Sylvie.chevret@paris7.jussieu.fr](mailto:Sylvie.chevret@paris7.jussieu.fr)
- 1359 Alexandre Demoule (14) [alexander.demoule@aphp.fr](mailto:alexander.demoule@aphp.fr)
- 1360
- 1361
- 1362

- 1363 (1) Medical Intensive Care Unit, APHP, Hôpital Saint-Louis. ECSTRA Team, and  
1364 Clinical Epidemiology, UMR 1153, (Center of Epidemiology and Biostatistics, Sorbonne  
1365 Paris Cité, CRESS), INSERM, Paris Diderot Sorbonne University, Paris, France.
- 1366 (2) Intensive Care Unit, Paoli Calmettes Institut, Marseille, France
- 1367 (3) Critical Care Center, CHU de Lille, Lille, France
- 1368 (4) Medical Intensive Care Unit, Hospices Civils de Lyon, Hôpital Edouard Herriot, Lyon,  
1369 France
- 1370 (5) Medical Intensive Care Unit, Hôpital Cochin, APHP, Université Paris Descartes, Paris,  
1371 France.
- 1372 (6) Medical Intensive Care Unit and INSERM U1088, Amiens University Hospital,  
1373 Amiens, France.
- 1374 (7) Medical Intensive Care Unit, André Mignot Hospital, Versailles, France.
- 1375 (8) Medical Intensive Care Unit, CHU de Montpellier, Montpellier, France
- 1376 (9) Medical Intensive Care Unit, La Source Hospital, CHR Orléans, Orléans, France.
- 1377 (10) Medical Intensive Care Unit, Hotel Dieu, CHU de Nantes, Nantes, France
- 1378 (11) Intensive Care Unit, Institut Gustave Roussy, Villejuif, France
- 1379 (12) Intensive Care Unit, CHR de Metz-Thionville, Metz, France
- 1380 (13) Department of Perioperative Medicine, CHU Clermont-Ferrand, Clermont-Ferrand,  
1381 France
- 1382 (14) Medical Intensive Care Unit and Respiratory Division, La Pitié-Salpêtrière  
1383 University Hospital; Neurophysiologie Respiratoire Expérimentale et Clinique, Sorbonne  
1384 Universités, UPMC Univ Paris 06, INSERM, UMRS\_1158, Paris, France
- 1385 (15) Intensive Care Unit, Lyon Sud Medical Center, Lyon, France
- 1386 (16) Medical Intensive Care Unit, CHRU, Angers, France

- 1387 (17) Intensive Care Unit, Centre Hospitalier Métropole-Savoie,, Chambéry, France
- 1388 (18) Medical Intensive Care Unit, Hôpital Brabois, Vandoeuvre Les Nancy, France
- 1389 (19) Medical Intensive Care Unit, Hôpital Charles Nicolle, Rouen, France
- 1390 (20) Department of Anesthesiology and Critical Care Medicine B (DAR B), Saint-Eloi  
1391 Hospital, University Teaching Hospital of Montpellier; INSERM U1046, CNRS, UMR 9214,  
1392 Montpellier, France.
- 1393 (21) Medical Intensive Care Unit, Avicenne University Hospital, Bobigny, France.
- 1394 (22) Intensive Care Unit, Roubaix hospital, Roubaix, France
- 1395 (23) Medical Intensive Care Unit, CHU de Grenoble Alpes, Grenoble, France
- 1396 (24) Medical Intensive Care Unit, CHU Bichat, Paris, France
- 1397 (25) Intensive Care Unit, Centre Hospitalier Départemental Les Oudairies, La Roche Sur  
1398 Yon
- 1399 (26) Medical Intensive Care Unit, Gabriel-Montpied University Hospital, Clermont-  
1400 Ferrand, France
- 1401 (27) Medical Intensive Care Unit, CHU Saint-Antoine, Paris, France
- 1402 (28) Department of Anesthesia and Critical Care, Necker Hospital, Paris, France
- 1403 (29) Réanimation des Détresses Respiratoires et Infections Sévères, Assistance Publique -  
1404 Hôpitaux de Marseille, Hôpital Nord, Aix-Marseille Université, Faculté de Médecine,  
1405 Marseille
- 1406 (30) Respiratory Intensive Care Unit, Hôpital Cochin, Paris, France
- 1407 (31) Medical Intensive Care Unit, Hôpital Nord, Saint Etienne, France
- 1408 (32) Biostatistics department, Saint Louis Teaching Hospital, Paris, France
- 1409
- 1410



1411 **Author for correspondence**

1412 Professor Elie Azoulay, Medical Intensive Care Unit, APHP, Hôpital Saint-Louis.

1413 ECSTRA team, and clinical epidemiology, UMR 1153 (Center of Epidemiology and

1414 Biostatistics Sorbonne Paris Cité, CRESS), INSERM, Paris Diderot Sorbonne University.

1415 E-mail: [elie.azoulay@aphp.fr](mailto:elie.azoulay@aphp.fr)

1416

1417 **Abstract (325 words)**

1418 **Background.** Acute respiratory failure (ARF) is the leading reason for intensive care unit  
1419 (ICU) admission in immunocompromised patients. High-flow nasal oxygen (HFNO) therapy  
1420 is an alternative to standard oxygen. By providing warmed and humidified gas, HFNO allows  
1421 the delivery of higher flow rates via nasal cannula devices, with FiO<sub>2</sub> values of nearly 100%.  
1422 Benefits include alleviation of dyspnea and discomfort, decreased respiratory distress and  
1423 decreased mortality in unselected patients with acute hypoxemic respiratory failure. However,  
1424 in preliminary reports, HFNO benefits are controversial in immunocompromised patients in  
1425 whom it has never been properly evaluated.

1426 **Methods and Design.** This is a randomized multicenter open-label controlled superiority  
1427 trial in 30 intensive care units part of the Groupe de Recherche Respiratoire en Réanimation  
1428 Onco-Hématologique (GRRR-OH). Inclusion criteria will be: 1) adults; 2) known  
1429 immunosuppression; 3) ARF; 4) oxygen therapy  $\geq$  6L/min; 5) written informed consent from  
1430 patient or proxy. Exclusion criteria will be: 1) imminent death (moribund patient); 2) no  
1431 informed consent; 3) hypercapnia (PaCO<sub>2</sub>  $\geq$  50 mmHg), 4) isolated cardiogenic pulmonary  
1432 edema, 5) pregnancy or breastfeeding, 6) anatomical factors precluding insertion of a nasal  
1433 cannula; 7) no coverage by the French statutory healthcare insurance system; and 8) post  
1434 surgical setting from day-1 to day-6 (patients with ARF occurring after day-6 of surgery can  
1435 be included).

1436 The primary outcome measure is day-28 mortality. Secondary outcomes are intubation  
1437 rate, comfort, dyspnea, respiratory rate, oxygenation, ICU length of stay, and ICU-acquired  
1438 infections.

1439 Based on an expected 30% mortality rate in the standard oxygen group, and 20% in the  
1440 HFNO group, error rate set at 5% and a statistical power at 90%, 389 patients are required in

1441 each treatment group (778 patients overall). Recruitment period is estimated at 30 months,  
1442 with 28 days of additional follow-up for the last included patient.

1443 **Discussion.** The HIGH study will be the largest multicenter randomized controlled trial  
1444 seeking to demonstrate that survival benefits from HFNO reported in unselected patients also  
1445 apply to a large immunocompromised population.

1446

1447 **Trial registration.** ClinicalTrial.gov NCT02739451, registered on April 15, 2016

1448

1449 **Key words.** Acute respiratory failure, Immunosuppression, Immunocompromised  
1450 Hematology, Mortality, High flow oxygen, Oxygen, Intubation.

1451

1452

1453

1454 **Background**

1455 Acute respiratory failure (ARF) is the leading reason for ICU admission of  
1456 immunocompromised patients.<sup>1-6</sup> Mortality has decreased dramatically in this population in  
1457 recent years, for several reasons. Management strategies for the underlying conditions have  
1458 benefited from a number of innovations such as steroid-sparing agents, watch-and-wait  
1459 approaches, and targeted therapies.<sup>7, 8</sup> Early ICU admission to permit the use of non-invasive  
1460 diagnostic and therapeutic strategies has increased survival.<sup>1, 9-11</sup> Finally, the introduction of  
1461 other oxygenation strategies improved the management of respiratory dysfunction (Table 1).

1462 Oxygen therapy is the first-line treatment in hypoxemic patients. Oxygen can be  
1463 delivered using low-flow devices (up to 15 L/min) such as nasal cannulas, non-rebreathing  
1464 masks, and bag valve masks. The fraction of inspired oxygen (FiO<sub>2</sub>) obtained using these  
1465 devices varies with the patient's breathing pattern, peak inspiratory flow rate, delivery system,  
1466 and mask characteristics. Maximum flow rates are limited in part by the inability of these  
1467 devices to heat and humidify gas at high flows. Also, if the patient has a high inspiratory flow  
1468 rate, the amount of entrained room air is large and dilutes the oxygen, thereby lowering the  
1469 FiO<sub>2</sub>.

1470 Over the past two decades, devices that deliver heated and humidified oxygen at high  
1471 flows through a nasal cannula were developed as an alternative to low/medium flow devices.  
1472 High-flow nasal oxygen (HFNO) delivers oxygen flow rates of up to 60 L/min. An air/oxygen  
1473 blender is connected via an active heated humidifier to a nasal cannula and allows FiO<sub>2</sub>  
1474 adjustment independently from the flow rate. Compared to other devices, HFNO provides a  
1475 number of physiological benefits including greater comfort and tolerance, more effective  
1476 oxygenation under some circumstances and breathing pattern improvements with an increase  
1477 in tidal volume and decreases in respiratory rate and dyspnea (Table 2 and Table 3). These

1478 benefits are broadening the indications of HFNO, which has now been evaluated and used to  
1479 treat hypoxemic respiratory failure, to improve oxygenation for pre-intubation, and to treat  
1480 patients after surgery or after extubation (Table 4). Moreover, recent high-quality randomized  
1481 controlled trials have confirmed previous preliminary results.<sup>13, 14</sup> Nevertheless, controlled  
1482 studies in specific patient populations, such as immunocompromised patients, are needed to  
1483 confirm that HFNO is clinically superior over other methods, to evaluate effects on survival,  
1484 and to determine the optimal indications of HFNO compared to other modalities such as  
1485 standard oxygen therapy and NIV.

1486         Among patients with ARF, those with immunosuppression have higher mortality rates  
1487 compared to unselected patients. The use of endotracheal mechanical ventilation is associated  
1488 with higher mortality in immunocompromised patients. Therefore, management techniques  
1489 that decrease the need for intubation may hold promise for decreasing mortality.

1490         Four studies evaluated the feasibility and safety of HFNO in immunocompromised  
1491 patients with ARF. In a retrospective single-center study reported in 2013, the feasibility of  
1492 HFNO was evaluated in 45 patients with hematological malignancies.<sup>57</sup> Of the 45 patients, 15  
1493 recovered without intubation (33%); their hospital mortality rate was 2/15 (13%), compared to  
1494 26/30 (87%) of the patients who failed HFNO and required intubation. HFNO failure was  
1495 significantly associated with bacterial pneumonia as the cause of ARF. In a single-centre  
1496 study of patients with solid tumors reported in 2011, of 183 patients taken at random from the  
1497 institutional database, 132 (72%) had received HFNO in the ICU to treat hypoxia.<sup>58</sup> Among  
1498 them, 41% improved and 44% remained stable while on HFNO, whereas 15% declined. A  
1499 2013 report describes a study in 30 patients with advanced cancer and persistent dyspnea that  
1500 used a randomized design to compare the physiological effects of HFNO versus BiPAP for 2  
1501 hours.<sup>59</sup> Both treatments similarly improved the dyspnea, as assessed using a visual analogue  
1502 scale and the modified Borg scale, and non-significantly diminished the respiratory rate.

1503 Oxygen saturation improved only with HFNO. Neither technique induced major adverse  
1504 effects. The last study, published in 2015, evaluated HFNO for treating ARF requiring ICU  
1505 admission in 37 lung transplant recipients.<sup>60</sup> HFNO proved feasible and safe and decreased  
1506 the absolute risk of intubation by 29%, with a number-needed-to-treat to avoid one intubation  
1507 of three. Last, in a study of 50 **Do-Not-Intubate** patients with hypoxemic respiratory distress,  
1508 including a third of immunocompromised patients, HFNO allowed an improvement in  
1509 oxygenation and decreased respiratory rate.<sup>61</sup>,

1510 Four studies assessed HFNO efficacy in immunocompromised patients with ARF. The  
1511 first study, by Mokart et al., analyzed a retrospective cohort of 178 patients with cancer and  
1512 ARF ( $O_2 > 9$  L/min), including 76 (43%) treated with NIV+HFNO, 74 (42%) with  
1513 NIV+low/medium-flow  $O_2$ , 20 (11%) with HFNO alone, and 8 with low/medium-flow  $O_2$   
1514 alone.<sup>62</sup> NIV+HFNO was associated with lower mortality (37% vs. 52% in remaining  
1515 patients,  $p=0.04$ ) and was independently associated with lower day-28 survival in a  
1516 propensity-score analysis. Second, in a sub-study of data from our recent iVNIctus RCT of  
1517 early NIV in immunocompromised patients with ARF,<sup>63</sup> 141/374 (38%) patients received  
1518 HFNO, and either NIV or low/medium-flow oxygen was used in the other patients. To allow  
1519 accurate adjustment, we built a propensity score using variables available at ICU admission.  
1520 Intubation rate and day-28 mortality were not significantly different in the HFNO arm  
1521 compared to the NIV or low/medium-flow oxygen arm. Third, in 115 immunocompromised  
1522 patients with ARF, 60 (52 %) were treated with HFNO alone and 55 (48 %) with NIV as first-  
1523 line therapy with 30 patients (55 %) receiving HFNO and 25 patients (45 %) standard oxygen  
1524 between NIV sessions<sup>66</sup>. The rates of intubation and 28-day mortality were higher in patients  
1525 treated with NIV than with HFNO (55 vs. 35 %,  $p = 0.04$ , and 40 vs. 20 %,  $p = 0.02$ ,  
1526 respectively). Using propensity score-matched analysis, NIV was associated with mortality.  
1527 Using multivariate analysis, NIV was independently associated with intubation and mortality.

1528 Last, in a post-hoc analysis of the FLORALI study that only included immunocompromised  
1529 patients, 8 (31%) of 26 HFNO patients, 13 (43%) of 30 patients treated with standard oxygen,  
1530 and 17 (65%) of 26 patients treated with NIV required intubation at 28 days ( $p=0.04$ ). Odds  
1531 ratios for intubation did not differ however between HFNO patients and those receiving  
1532 standard oxygen only<sup>67</sup>. Last, in the Efraim study that included 1611 immunocompromised  
1533 patients with acute respiratory failure, the use of HFNO had an effect on intubation rate but  
1534 not on mortality, whereas, failure to identify ARF etiology was associated with increased  
1535 intubation rate and mortality<sup>68</sup>.

1536 Although the effects of HFNO have varied across studies, the data establish that this  
1537 treatment modality is feasible and safe in immunocompromised patients. They also  
1538 demonstrate that outcomes with HFNO are at least as good as with other oxygen therapy  
1539 methods in this population. Thus, they warrant further trials to determine whether HFNO  
1540 improves survival in unselected immunocompromised patients with hypoxemic ARF.  
1541 Immunocompromised patients have specific treatment needs, as shown by their 2-fold higher  
1542 mortality rate after intubation compared to other patients. Data on HFNO in  
1543 immunocompromised patients are conflicting.

1544 We therefore designed the present RCT (HIGH). This RCT is a superiority study of  
1545 HFNO versus other oxygenation strategies (low/medium-flow oxygen) in  
1546 immunocompromised patients requiring oxygen. The primary endpoint is day-28 survival.  
1547 The patients will be recruited at 31 centers belonging to the GRRR-OH, a research network  
1548 that specializes in the management of critically ill immunocompromised patients and has a  
1549 particularly high level of expertise in respiratory care strategies. The control group will  
1550 receive low/medium-flow oxygen as deemed appropriate by the physician, since the recent  
1551 large iVNIctus trial by our group did not show any superiority of NIV on intubation rates or  
1552 survival. The experimental group will receive continuous HFNO at any time after ICU

1553 admission, for pre-oxygenation before intubation, after extubation, and for any ICU procedure  
1554 that might induce hypoxemia). HFNO will not be used in the control group.

1555



1556 **Methods / Design**

1557 *Design and settings*

1558 The HIGH trial is a prospective, multicenter, open-label, randomized controlled trial  
1559 comparing HFNO versus other oxygenation strategies (low/medium-flow oxygen) in  
1560 immunocompromised patients requiring oxygen. The study hypothesis is that early HFNO  
1561 decreases mortality on day 28 after randomization in immunocompromised patients requiring  
1562 ICU admission for ARF.

1563 *Ethical aspects*

1564 The study was approved by the local independent ethic committee (Comite de  
1565 Protection des Personnes CPP Ile de France IV, Saint Louis on March 28, 2016, number  
1566 2016/08), the French health authorities (AFSSAPS) on March 14, 2016, number EudraCT  
1567 2016-A00220-51. The University Hospital of Paris (AP-HP) and by delegation the Clinical  
1568 Research and Development Department (DRCD) is the sponsor of the trial (Sponsor code:  
1569 P150912/IDRCB No: 2016-A00220-51). Informed consent will be obtained from each  
1570 participant.

1571 *Participating intensive care units*

1572 All participating centers belong to the Grrr-OH, a research network specializing in the  
1573 respiratory care of critically ill immunocompromised patients. All these centers have  
1574 previously taken part in observational studies, surveys, or therapeutic trials. They all have  
1575 high case-volumes of patients with immune deficiencies due to immunosuppressive drugs,  
1576 solid-organ transplantation, malignancies, or systemic diseases. Although they are specialized  
1577 in oncology and hematology, they also admit high volumes of patients with systemic diseases,  
1578 solid organ transplant and other immunosuppression.

1579            ***Study population***

1580            Eligible patients are immunocompromised patients who are admitted to the ICU and  
1581 need oxygen supplementation (of at least 6l/min) at any stage of their ICU stay. All  
1582 randomized patients will be included in the full set of analysis (intent-to-treat basis).

1583            To be randomized patients should fulfill all the following inclusion criteria 1) adult (age  
1584  $\geq 18$  years); 2) known immunosuppression defined as one or more of the following:  
1585 immunosuppressive drugs/long-term [ $>3$  months] or high-dose [ $>0.5$  mg/kg/day] steroids,  
1586 solid organ transplant, solid tumor having required cancer care in the last 5 years,  
1587 hematological malignancy or primary immune deficiency; 3) ICU admission for Acute  
1588 Respiratory Failure, 4) need for oxygen therapy  $\geq 6$ L/min, 5) Written informed consent from  
1589 the patient or proxy (if present) before inclusion or once possible when patient has been  
1590 included in a context of emergency.

1591            Exclusion criteria were: 1) imminent death (moribund patients); 2) refusal of study  
1592 participation or to pursue the study by the patient; 3) hypercapnia with a formal indication for  
1593 NIV (PaCO<sub>2</sub>  $\geq 50$  mmHg, formal indication for NIV); 4) isolated cardiogenic pulmonary  
1594 edema (formal indication for NIV). Patients with pulmonary edema associated with another  
1595 ARF etiology can be included; 5) pregnancy or breastfeeding; 6) anatomical factors  
1596 precluding the use of a nasal cannula; 7) absence of coverage by the French statutory  
1597 healthcare insurance system; 8) post-surgical setting from D1 to D6 (patients with ARF  
1598 occurring after day-6 of surgery can be included).

1599            ***Randomization***

1600            Randomization will be stratified on three factors, measured at study inclusion, namely:  
1601 1) time since ICU admission, segregating D0 (calendar date of ICU admission), D1, D2

1602 versus  $\geq D3$ ; 2) hypoxemia severity, segregating oxygen flow  $< vs. \geq 9L$  to reach  $SpO_2 \geq 95\%$   
1603 at randomization; 3) shock, based on the administration of catecholamine. Thus, analysis  
1604 could consider treatment-by-subset interaction on such strata.

1605 Randomization will be achieved using an electronic system incorporated in the eCRF  
1606 and R software [<http://www.R-project.org/>]. The impact of the intervention will be assessed at  
1607 the patient level. The randomization unit is the center. Randomization will be centralized on a  
1608 web site to ensure allocation concealment at the trial statistical center. Patients will be  
1609 randomized into two parallel groups, in a 1:1 ratio. Randomization will be stratified (see  
1610 above), resulting in eight different randomization lists that will be pre-specified and balanced  
1611 through the use of permutation blocks of fixed size that will not be disclosed to the local  
1612 investigators, to ensure allocation concealment and to avoid all risk of bias in patient  
1613 selection.

#### 1614 ***Study interventions***

1615 This open randomized controlled trial will compare two oxygenation strategies.

#### 1616 ***A. Standard oxygen as the usual care [control group]***

1617 Patients in the control group will receive the best standard of care, according to the usual  
1618 practice of the local intensivists and primary-care physicians. Oxygen therapy will be  
1619 delivered using any device or combination of devices that are part of usual care: nasal oxygen,  
1620 and mask with or without a reservoir bag and with or without the Venturi system. Oxygen  
1621 settings are set to target a  $SpO_2 \geq 95$ . HFNO will not be used in the control group. NIV will not  
1622 be used at all in this trial, unless patients develop hypercapnia or pulmonary edema  
1623 throughout the ICU stay, for the time they meet these conditions. ICU discharge will be  
1624 allowed when patients will meet the ability to maintain  $SpO_2 \geq 95\%$  with less than 6 L/min  
1625 oxygen.

1626 **B. High-flow nasal oxygen [intervention group]**

1627 Patients in the HFNO group will receive the best standard of care, according to the usual  
1628 practice of the local intensivists and primary physicians, with one exception: supplemental  
1629 oxygen will be provided only by continuous HFNO. HFNO will be initiated at a flow rate of  
1630 50 L/min and 100% FiO<sub>2</sub>. If the target SpO<sub>2</sub> is not reached, the flow rate will be increased to  
1631 60 L/min. Then, FiO<sub>2</sub> will be tapered to target a SpO<sub>2</sub>≥95%. The minimal flow rate within the  
1632 first three days will be 50 L/min. In patients who require intubation, HFNO will be used  
1633 during laryngoscopy and immediately after extubation. Also, HFNO will be used before,  
1634 during, and after all ICU procedures. Patients with discomfort due to HFNO will have their  
1635 flow rate decreased until the discomfort resolves. If the nasal prongs generate significant  
1636 discomfort or skin breakdown, a Venturi mask will be used instead until HFNO can be used  
1637 again; except in this situation, standard oxygen will be used in the intervention group. NIV  
1638 will however be used in the same conditions than in the control group.

1639 HFNO will be stopped based on clinical criteria [improvement of clinical signs of  
1640 respiratory distress], PaO<sub>2</sub>/FiO<sub>2</sub>>300, and ability to maintain SpO<sub>2</sub>≥95% with less than 6  
1641 L/min of standard oxygen [allowing ICU discharge as HFNO may not be available in the  
1642 wards].

1643 ***Data collection and follow-up***

1644 *Evaluation at study inclusion (T0)*

1645 The evaluation at study inclusion will include patient's characteristics, underlying  
1646 disease, associated organ dysfunction, investigations usually performed at ICU admission in  
1647 immunocompromised patients with ARF, and ARF etiology.

1648 *Evaluations throughout study participation*

1649 Evaluations performed throughout study participation will include physiological  
1650 variables including respiratory and ventilation parameters (respiratory rate, SpO<sub>2</sub>, oxygen flow  
1651 and/or FiO<sub>2</sub>), blood gases and Chest X-Ray (the worst values will be recorded). Results of  
1652 investigations, ICU-acquired infections and data on oxygenation tolerance and efficacy as well  
1653 as on comfort will be also collected.

1654 **ICU-acquired infections are defined as any new-onset infection starting more than 48**  
1655 **hours after ICU admission for which the clinical team started a new antibiotic regimen. Every**  
1656 **single infection will be made using Centers for Disease Control and Prevention definitions.<sup>69</sup>**

1657 *Evaluation at the end of study participation*

1658 Evaluations performed at the end of study participation will consist of mortality on day  
1659 28, need for intubation, ICU and hospital lengths of stay and ICU-acquired infections. All  
1660 elements allowing to record secondary endpoints will be collected.

1661 ***Organization of the trial***

1662 *Funding and support*

1663 The HIGH trial is promoted by the Assistance Publique - Hôpitaux de Paris and  
1664 supported by a grant from the French Ministry of Health (Programme Hospitalier de  
1665 Recherche Clinique 2012; AOM12456).

1666 *Coordination and implementation of the trial*

1667 Each medical and paramedical team in the 31 participating ICUs were trained in the  
1668 protocol and data collection using an electronic case-record form during formal meetings  
1669 prior to screening and inclusion. The electronic case-record form was developed with  
1670 CleanWEB™, a centralized, secure, interactive, web-response system accessible from each  
1671 study center, provided and managed by Telemedicine Technologies.

1672 Local physicians and clinical research assistants in each participating ICU are  
1673 responsible for daily screening and inclusion of patients, compliance with protocol,  
1674 availability of data requested for the trial and completion of the electronic case-record form.  
1675 In accordance with French law, the electronic case-record form and database were validated  
1676 by appropriate committees (Comité Consultatif sur le Traitement de l'Information en matière  
1677 de Recherche dans le domaine de la Santé; Commission Nationale de l'Informatique et des  
1678 Libertés).

1679 *Interim analysis*

1680 One interim analysis by an independent data safety and monitoring board is planned  
1681 after the occurrence of 100 deaths. The data safety and monitoring board will be blinded to  
1682 allocation of groups and may decide premature termination of the study. The board consists of  
1683 one methodologist, one pulmonologist, and one intensivist. Data are blindly analyzed but  
1684 unblinding is possible on request of the data safety and monitoring board. An extraordinary  
1685 meeting may be requested by the principal investigator or the methodologist, in the case of  
1686 unexpected events that might affect continuation of the protocol.

1687 ***Blinding***

1688 Given the nature of the interventions, physicians, nurses, and patients cannot be blinded  
1689 for the randomized interventions. The analysis will be blinded to allocation of groups.

1690 ***Study outcomes***

1691 *Primary endpoint*

1692 The primary endpoint of this trial is day-28 mortality.

1693 *Secondary endpoints*

1694 The secondary endpoints are: intubation rate (proportion of patients requiring invasive  
1695 mechanical ventilation) on day 28, patient comfort (visual analogue scale [VAS]), dyspnea  
1696 (VAS and Borg scale), respiratory rate, oxygenation (based on the lowest SpO<sub>2</sub> value and on  
1697 PaO<sub>2</sub>/FiO<sub>2</sub> from day 1 to day 3, ICU stay length, incidence of ICU-acquired infections.

1698 *Statistical methods*

1699 All statistical analyses will be performed using SAS (SAS Inc, Cary, NC, USA) and R  
1700 (<http://www.R-project.org/>) software.

1701 *Sample size calculation*

1702 Based on a 30% day-28 mortality rate in usual-care oxygen group, and a 20% day-28  
1703 mortality rate in the HFNO group, with  $\alpha$  set at 5%, to obtain a 90% power for demonstrating  
1704 superiority for the primary outcome, we need 778 patients (389 in each group).

1705 Recruitment is expected to take 30 months, and 28 additional days will be required for  
1706 follow-up.

1707 *Interim analyses*

1708 One interim analysis will be performed, once 100 deaths will have been observed. Due  
1709 to inflation of type I error consideration, it will use the Haybittle-Peto boundary, that is a p-  
1710 value threshold of 0.001 for the interim analysis (while the terminal analysis will use a  
1711 threshold of 0.05, as scheduled) in the sample size computation). Moreover, to get insight in  
1712 the difference across arms in terms of futility or efficacy, the Bayesian posterior probability of  
1713 the 28 day mortality rate and of the log odds ratio will be computed, using a uniform non  
1714 informative prior. The final analysis will be started after inclusion of the planned number of  
1715 patients.

1716 *Methodology of the statistical analysis*

1717 The main comparison based on the intention-to-treat principle will compare the  
1718 intervention arm to the control arm on the full-set of randomized patients. The primary  
1719 hypothesis is superiority of the NIV in terms of 28-day mortality (primary outcome). For all  
1720 secondary outcomes, our hypothesis is that HFNO is superior over standard oxygen, with two-  
1721 sided p-values for comparison tests. Secondary and exploratory comparisons of the primary  
1722 endpoint will look for treatment-by-covariate interactions according to the subsets defined  
1723 above. Finally, a per-protocol analysis will be performed.

1724 *Missing values and outliers*

1725 Missing values for the main outcome measure are not expected to be observed;  
1726 nevertheless, in case of occurrence, they will be handled using time-to-event methods in  
1727 which each patient contributes to the estimate of failure time distribution until he/she is lost-  
1728 to-follow up or withdrawn from the study using competing-risks estimates. Missing values for  
1729 predictors will be imputed using multiple imputation techniques.

1730 *Analysis of the primary outcome*

1731 The main endpoint is binary, as all patients will be followed until day 28, at which time  
1732 they will be classified as alive or dead. The relative risk of hospital death in the experimental  
1733 versus the control arm will be estimated to assess the effectiveness of the intervention, with  
1734 95% confidence interval. Analyses adjusted on potential confounders will be performed.  
1735 Intervention-by-subsets interactions will be tested using Gail and Simon statistics. In case of  
1736 significant interaction, subset analyses will be performed on each subset.

1737 *Analysis of the secondary outcomes*



1738           Competing-risk endpoints (ICU-acquired events including intubation, ICU-acquired  
1739 infection) will be analysed using competing-risk methods. Specifically, cumulative incidences  
1740 of the event of interest will be estimated, taking into account the competition between death  
1741 or discharge alive from the ICU and the event of interest, then compared using the Gray test.  
1742 Adjustment for potential confounders will be based on cause-specific Cox models. ICU length  
1743 of stay will be analysed overall and in survivors and dead patients, separately. The former  
1744 analysis will be based on Kaplan Meier estimate while the later on the competing-risk  
1745 estimator, as described above. Analyses of longitudinal outcomes (oxygenation, dyspnea,  
1746 patient's comfort) will be based on joint models, taking into account the right censoring of the  
1747 data.

1748

1749

1750 **Discussion**

1751 ARF remains the most frequent and challenging life-threatening event in patients with  
1752 hematological malignancies. In patients with prolonged neutropenia (acute leukemia or bone  
1753 marrow transplant recipients), respiratory events occur in up to half of cases, of which a  
1754 further half are complicated by ARF. Despite a recent improvement in survival, intubation  
1755 and subsequent invasive mechanical ventilation remains associated with high mortality in  
1756 immunocompromised patients with ARF. In recent studies, mortality after intubation was  
1757 60% in hematological patients and 40% in immunocompromised patients. In that setting, any  
1758 strategy that could prevent intubation and subsequent increase in mortality could be of  
1759 benefit.

1760 HFNO has been associated with an increase survival for immunocompetent patients  
1761 managed in the ICU for a hypoxemic ARF, and with a decrease in intubation rate in the most  
1762 hypoxemic patients. Nevertheless, data are scarce in specific patient populations, such as  
1763 immunocompromised patients, who are at high risk of intubation when presenting with ARF.  
1764 Clearly, data are needed to confirm that HFNO is clinically superior over other methods in  
1765 immunocompromised patients. It fully justifies the HIGH trial.

1766 As a consequence of the negative result of our recent iVNIctus multicentre randomized  
1767 controlled trial that did not show a benefit of NIV on mortality nor on intubation in  
1768 immunocompromised patients with ARF, we have decided that NIV would not delivered in a  
1769 systematic way to the patients included in the HIGH trial. In addition, recent data from an  
1770 ancillary study of the FLORALI trial suggests that intubation rate and mortality were higher  
1771 in patients treated with NIV than in those treated with HFNO. However, clinicians in charge  
1772 will be allowed to deliver NIV to patients with a well-established indication of NIV, such as  
1773 cardiogenic pulmonary edema and hypercapnic ARF.

1774 We expect the HIGH trial to assess an oxygenation management strategy including  
1775 HFNO. We hypothesize that mortality will be lower in patient receiving HFNO, possibly in  
1776 association with a reduction of the intubation rate. We also expect the HIGH trial to analyze  
1777 the factors that predict intubation in immunocompromised patients with ARF.

1778

1779 **Trial status**

1780 Enrollment is ongoing, having started on May 2016. The first interim analysis was  
1781 conducted in March 13, 2017, and the data safety and monitoring board recommended that the  
1782 study be continued. On November 13, 2017, 686 patients were included in the trial.

1783 Enrollment is expected to be completed in February 2018.

1784

1785

1786 **Abbreviations**

1787 **HFNO: high flow nasal oxygen**

1788 **ICU: intensive care unit**

1789 **NIV: noninvasive ventilation**

1790 **ARF : acute respiratory failure**

1791 **GRRR-OH : Groupe de recherche respiratoire en réanimation**  
1792 **oncohématologique**

1793

1794

1795 **Declarations**

1796 **- Ethical Approval and Consent to participate**

1797 The study was approved by the IRB of the St-Louis hospital. All patients or relatives  
1798 provided signed informed consent.

1799 **- Consent for publication**

1800 All authors consent to see this protocol article published. All have given input on the  
1801 submitted version and approved it.

1802 **- Availability of supporting data**

1803 All the data collected for this study are in the hands of Sylvie Chevret MD, PhD who is  
1804 the methodologist of the trial and statistician for the study. All data will be available upon  
1805 request.

1806 **- Competing interests**

1807 None of the authors has any conflict of interest in relation with this study. The institutions  
1808 of Elie Azoulay, Samir Jaber, Alexandre Demoule and Virginie Lemiale have received  
1809 scientific support from Fisher & Payckle outside this study.

1810 **- Funding**

1811 The study has received a grant from the French Ministry of Health.

1812 **- Authors' contributions**

1813 EA, VL, DM and AD have drafted the initial version of the protocol and have requested  
1814 funding to the Ministry of health. SC has designed the study and planned the statistics. She  
1815 also run the interim analyses. SN, LA, FP, LK and FB participated to study conception and to  
1816 address initial discussions that helped obtain the grant. EA, VL, DM, AD, SN, LA, FP, LK  
1817 FB, KK, FB, JR, AS, GL, JMC, JM, FW, AK, VP, PP, CG, SJ, JO, MY, NT, LB, CL, AL,  
1818 NB, JHR, LP, AR and MD also gave feedback on study design and coordination and helped to  
1819 draft the manuscript. All authors read and approved the final manuscript. All authors attended  
1820 the investigators meeting, are responsible for all decisions regarding the study, are responsible  
1821 for recruiting patients, collecting data and completing information on e-crf.

1822 **- Acknowledgements**

1823 Fisher & Payckle provided the high flow oxygen devices to participating centers as to  
1824 increase their ability to recruit several patients at the same time. None of the people listed in  
1825 the author's group has received any honorarium or fees for participation to this study.

1826 **- Authors' information**

1827 Elie Azoulay (1), [elie.azoulay@aphp.fr](mailto:elie.azoulay@aphp.fr); Virginie Lemiale (1), [virginie.lemiale@aphp.fr](mailto:virginie.lemiale@aphp.fr):  
1828 (1) Medical Intensive Care Unit, APHP, Hôpital Saint-Louis. ECSTRA Team, and Clinical  
1829 Epidemiology, UMR 1153, (Center of Epidemiology and Biostatistics, Sorbonne Paris Cité,  
1830 CRESS), INSERM, Paris Diderot Sorbonne University, Paris, France.

1831 Djamel Mokart (2), [mokartd@ipc.unicancer.fr](mailto:mokartd@ipc.unicancer.fr): (2) Intensive Care Unit, Paoli Calmettes  
1832 Institut, Marseille, France

1833 Saad Nseir (3), [Saadalla.NSEIR@CHRU-LILLE.FR](mailto:Saadalla.NSEIR@CHRU-LILLE.FR): (3) Critical Care Center, CHU de  
1834 Lille, Lille, France

1835 Laurent Argaud (4), [Laurent.argaud@chu-lyon.fr](mailto:Laurent.argaud@chu-lyon.fr): (4) Medical Intensive Care Unit,  
1836 Hospices Civils de Lyon, Hôpital Edouard Herriot, Lyon, France

1837 Frédéric Pène (5), [Frederic.pene@aphp.fr](mailto:Frederic.pene@aphp.fr): (5) Medical Intensive Care Unit, Hôpital  
1838 Cochin, APHP, Université Paris Descartes, Paris, France.

1839 Loay Kontar (6), [Kontar.Loay@chu-amiens.fr](mailto:Kontar.Loay@chu-amiens.fr); (6) Medical Intensive Care Unit and  
1840 INSERM U1088, Amiens University Hospital, Amiens, France.

1841 Fabrice Bruneel (7), [fbruneel@ch-versailles.fr](mailto:fbruneel@ch-versailles.fr) ; (7) Medical Intensive Care Unit, André  
1842 Mignot Hospital, Versailles, France.

1843 Kada Klouche (8), [k-klouche@chu-montpellier.fr](mailto:k-klouche@chu-montpellier.fr) : (8) Medical Intensive Care Unit, CHU  
1844 de Montpellier, Montpellier, France

1845 François Barbier (9), [Francois.barbier@chr-orleans.fr](mailto:Francois.barbier@chr-orleans.fr) : (9) Medical Intensive Care Unit,  
1846 La Source Hospital, CHR Orléans, Orléans, France.

1847 Jean Reignier (10), [jean.reignier@chu-nantes.fr](mailto:jean.reignier@chu-nantes.fr) : (10) Medical Intensive Care Unit, Hotel  
1848 Dieu, CHU de Nantes, Nantes, France

- 1849 Anabelle Stoclin (11), [anabelle.stoclin@gustaveroussy.fr](mailto:anabelle.stoclin@gustaveroussy.fr): (11) Intensive Care Unit,  
1850 Institut Gustave Roussy, Villejuif, France
- 1851 Guillaume Louis (12), [g.louis@chr-metz-thionville.fr](mailto:g.louis@chr-metz-thionville.fr): (12) Intensive Care Unit, CHR de  
1852 Metz-Thionville, Metz, France
- 1853 Jean-Michel Constantin (13), [jmconstantin@chu-clermontferrand.fr](mailto:jmconstantin@chu-clermontferrand.fr) : (13) Department of  
1854 Perioperative Medicine, CHU Clermont-Ferrand, Clermont-Ferrand, France
- 1855 Julien Mayaux (14), [Julien.mayaux@aphp.fr](mailto:Julien.mayaux@aphp.fr) : Alexandre Demoule (14)  
1856 [alexander.demoule@aphp.fr](mailto:alexander.demoule@aphp.fr) : Medical Intensive Care Unit and Respiratory Division, La Pitié-  
1857 Salpêtrière University Hospital; Neurophysiologie Respiratoire Expérimentale et Clinique,  
1858 Sorbonne Universités, UPMC Univ Paris 06, INSERM, UMRS\_1158, Paris, France
- 1859 Florent Wallet (15), [florent.wallet@chu-lyon.fr](mailto:florent.wallet@chu-lyon.fr) : (15) Intensive Care Unit, Lyon Sud  
1860 Medical Center, Lyon, France
- 1861 Achille Kouatchet (16), [AcKouatchet@chu-angers.fr](mailto:AcKouatchet@chu-angers.fr) : (16) Medical Intensive Care Unit,  
1862 CHRU, Angers, France
- 1863 Vincent Peigne (17), [vincent.peigne@ch-metropole-savoie.fr](mailto:vincent.peigne@ch-metropole-savoie.fr) : (17) Intensive Care Unit,  
1864 Centre Hospitalier Métropole-Savoie,, Chambéry, France
- 1865 Pierre Perez (18), [p.perez@chu-nancy.fr](mailto:p.perez@chu-nancy.fr) : (18) Medical Intensive Care Unit, Hôpital  
1866 Brabois, Vandoeuvre Les Nancy, France
- 1867 Christophe Girault (19), [Christophe.Girault@chu-rouen.fr](mailto:Christophe.Girault@chu-rouen.fr) : (19) Medical Intensive Care  
1868 Unit, Hôpital Charles Nicolle, Rouen, France
- 1869 Samir Jaber (20), [s-jaber@chu-montpellier.fr](mailto:s-jaber@chu-montpellier.fr) : (20) Department of Anesthesiology and  
1870 Critical Care Medicine B (DAR B), Saint-Eloi Hospital, University Teaching Hospital of  
1871 Montpellier; INSERM U1046, CNRS, UMR 9214, Montpellier, France.
- 1872 Johanna Oziel (21), [johanna.oziel@aphp.fr](mailto:johanna.oziel@aphp.fr) : (21) Medical Intensive Care Unit, Avicenne  
1873 University Hospital, Bobigny, France.
- 1874 Martine Nyunga (22), [Martine.nyunga@ch-roubaix.fr](mailto:Martine.nyunga@ch-roubaix.fr) : (22) Intensive Care Unit, Roubaix  
1875 hospital, Roubaix, France

- 1876 Nicolas Terzi (23), [nterzi@chu-grenoble.fr](mailto:nterzi@chu-grenoble.fr) : (23) Medical Intensive Care Unit, CHU de  
1877 Grenoble Alpes, Grenoble, France
- 1878 Lila Bouadma (24), [lila.bouadma@aphp.fr](mailto:lila.bouadma@aphp.fr) : (24) Medical Intensive Care Unit, CHU  
1879 Bichat, Paris, France
- 1880 Christine Lebert (25), [christine.lebert@chd-vendee.fr](mailto:christine.lebert@chd-vendee.fr) : (25) Intensive Care Unit, Centre  
1881 Hospitalier Départemental Les Oudairies, La Roche Sur Yon
- 1882 Alexandre Lautrette (26), [alautrette@chu-clermontferrand.fr](mailto:alautrette@chu-clermontferrand.fr) : (26) Medical Intensive Care  
1883 Unit, Gabriel-Montpied University Hospital, Clermont-Ferrand, France
- 1884 Naike Bigé (27), [naike.bige@aphp.fr](mailto:naike.bige@aphp.fr): (27) Medical Intensive Care Unit, CHU Saint-  
1885 Antoine, Paris, France
- 1886 Jean-Herlé Raphalen (28), [jh.raphalen@hotmail.fr](mailto:jh.raphalen@hotmail.fr) : (28) Department of Anesthesia and  
1887 Critical Care, Necker Hospital, Paris, France
- 1888 Laurent Papazian (29), [laurent.papazian@ap-hm.fr](mailto:laurent.papazian@ap-hm.fr) : (29) Réanimation des Détresses  
1889 Respiratoires et Infections Sévères, Assistance Publique - Hôpitaux de Marseille, Hôpital  
1890 Nord, Aix-Marseille Université, Faculté de Médecine, Marseille
- 1891 Antoine Rabbat (30), [antoine.rabbat@aphp.fr](mailto:antoine.rabbat@aphp.fr) : (30) Respiratory Intensive Care Unit,  
1892 Hôpital Cochin, Paris, France
- 1893 Michael Darmon (31), [Michael.darmon@aphp.fr](mailto:Michael.darmon@aphp.fr) : (31) Medical Intensive Care Unit,  
1894 Hôpital Nord, Saint Etienne, France
- 1895 Sylvie Chevret (32), [Sylvie.chevret@paris7.jussieu.fr](mailto:Sylvie.chevret@paris7.jussieu.fr) : (32) Biostatistics department,  
1896 Saint Louis Teaching Hospital, Paris, France
- 1897



1898        **Bibliography**

- 1899            1. Dumas G, Geri G, Montlahuc C, et al. Outcomes in Critically Ill Patients with  
1900 Systemic Rheumatic Disease: a multicenter study. *Chest* 2015;2015(21):14-3098.
- 1901            2. Faguer S, Ciroldi M, Mariotte E, et al. Prognostic contributions of the underlying  
1902 inflammatory disease and acute organ dysfunction in critically ill patients with systemic  
1903 rheumatic diseases. *Eur J Intern Med* 2013;24(3):e40-4.
- 1904            3. Soares M, Toffart AC, Timsit JF, et al. Intensive care in patients with lung cancer: a  
1905 multinational study. *Ann Oncol* 2014;25(9):1829-35.
- 1906            4. Azoulay E, Lemiale V, Mokart D, et al. Acute respiratory distress syndrome in  
1907 patients with malignancies. *Intensive Care Med* 2014;40(8):1106-14.
- 1908            5. Azoulay E, Pene F, Darmon M, et al. Managing critically Ill hematology patients:  
1909 Time to think differently. *Blood Rev* 2015;2015(26):00030-2.
- 1910            6. Canet E, Osman D, Lambert J, et al. Acute respiratory failure in kidney transplant  
1911 recipients: a multicenter study. *Crit Care* 2011;15(2):R91.
- 1912            7. Murphy G, Lisnevskaja L, Isenberg D. Systemic lupus erythematosus and other  
1913 autoimmune rheumatic diseases: challenges to treatment. *Lancet* 2013;382(9894):809-18.
- 1914            8. Guillevin L, Pagnoux C, Karras A, et al. Rituximab versus azathioprine for  
1915 maintenance in ANCA-associated vasculitis. *N Engl J Med* 2014;371(19):1771-80.
- 1916            9. Hilbert G, Gruson D, Vargas F, et al. Noninvasive ventilation in immunosuppressed  
1917 patients with pulmonary infiltrates, fever, and acute respiratory failure. *N Engl J Med*  
1918 2001;344(7):481-7.

- 1919 10. Azoulay E, Mokart D, Lambert J, et al. Diagnostic strategy for hematology and  
1920 oncology patients with acute respiratory failure: randomized controlled trial. *Am J Respir Crit*  
1921 *Care Med* 2010;182(8):1038-46.
- 1922 11. Mokart D, Lambert J, Schnell D, et al. Delayed intensive care unit admission is  
1923 associated with increased mortality in patients with cancer with acute respiratory failure. *Leuk*  
1924 *Lymphoma* 2013;54(8):1724-9.
- 1925 12. Dewan NA, Bell CW. Effect of low flow and high flow oxygen delivery on exercise  
1926 tolerance and sensation of dyspnea. A study comparing the transtracheal catheter and nasal  
1927 prongs. *Chest* 1994;105(4):1061-5.
- 1928 13. Frat JP, Thille AW, Mercat A, et al. High-flow oxygen through nasal cannula in acute  
1929 hypoxemic respiratory failure. *N Engl J Med* 2015;372(23):2185-96.
- 1930 14. Stephan F, Barrucand B, Petit P, et al. High-Flow Nasal Oxygen vs Noninvasive  
1931 Positive Airway Pressure in Hypoxemic Patients After Cardiothoracic Surgery: A  
1932 Randomized Clinical Trial. *Jama* 2015;313(23):2331-9.
- 1933 15. Campbell EJ, Baker MD, Crites-Silver P. Subjective effects of humidification of  
1934 oxygen for delivery by nasal cannula. A prospective study. *Chest* 1988;93(2):289-93.
- 1935 16. Chanques G, Constantin JM, Sauter M, et al. Discomfort associated with  
1936 underhumidified high-flow oxygen therapy in critically ill patients. *Intensive Care Med*  
1937 2009;35(6):996-1003.
- 1938 17. Wettstein RB, Shelledy DC, Peters JI. Delivered oxygen concentrations using low-  
1939 flow and high-flow nasal cannulas. *Respir Care* 2005;50(5):604-9.

- 1940 18. Wagstaff TA, Soni N. Performance of six types of oxygen delivery devices at varying  
1941 respiratory rates. *Anaesthesia* 2007;62(5):492-503.
- 1942 19. Vargas F, Saint-Leger M, Boyer A, Bui NH, Hilbert G. Physiologic Effects of High-  
1943 Flow Nasal Cannula Oxygen in Critical Care Subjects. *Respir Care* 2015;2015(5):03814.
- 1944 20. Itagaki T, Okuda N, Tsunano Y, et al. Effect of high-flow nasal cannula on thoraco-  
1945 abdominal synchrony in adult critically ill patients. *Respir Care* 2014;59(1):70-4.
- 1946 21. Corley A, Caruana LR, Barnett AG, Tronstad O, Fraser JF. Oxygen delivery through  
1947 high-flow nasal cannulae increase end-expiratory lung volume and reduce respiratory rate in  
1948 post-cardiac surgical patients. *Br J Anaesth* 2011;107(6):998-1004.
- 1949 22. Sztrymf B, Messika J, Bertrand F, et al. Beneficial effects of humidified high flow  
1950 nasal oxygen in critical care patients: a prospective pilot study. *Intensive Care Med*  
1951 2011;37(11):1780-6.
- 1952 23. Sztrymf B, Messika J, Mayot T, Lenglet H, Dreyfuss D, Ricard JD. Impact of high-  
1953 flow nasal cannula oxygen therapy on intensive care unit patients with acute respiratory  
1954 failure: a prospective observational study. *J Crit Care* 2012;27(3):324 e9-13.
- 1955 24. Dysart K, Miller TL, Wolfson MR, Shaffer TH. Research in high flow therapy:  
1956 mechanisms of action. *Respir Med* 2009;103(10):1400-5.
- 1957 25. Parke RL, Eccleston ML, McGuinness SP. The effects of flow on airway pressure  
1958 during nasal high-flow oxygen therapy. *Respir Care* 2011;56(8):1151-5.
- 1959 26. Berk JL, Lenner KA, McFadden ER, Jr. Cold-induced bronchoconstriction: role of  
1960 cutaneous reflexes vs. direct airway effects. *J Appl Physiol* (1985) 1987;63(2):659-64.

- 1961 27. Fontanari P, Burnet H, Zattara-Hartmann MC, Jammes Y. Changes in airway  
1962 resistance induced by nasal inhalation of cold dry, dry, or moist air in normal individuals. *J*  
1963 *Appl Physiol* (1985) 1996;81(4):1739-43.
- 1964 28. Chanques G, Riboulet F, Molinari N, et al. Comparison of three high flow oxygen  
1965 therapy delivery devices: a clinical physiological cross-over study. *Minerva Anesthesiol*  
1966 2013;79(12):1344-55.
- 1967 29. Greenspan JS, Wolfson MR, Shaffer TH. Airway responsiveness to low inspired gas  
1968 temperature in preterm neonates. *J Pediatr* 1991;118(3):443-5.
- 1969 30. Chikata Y, Izawa M, Okuda N, et al. Humidification performance of two high-flow  
1970 nasal cannula devices: a bench study. *Respir Care* 2014;59(8):1186-90.
- 1971 31. Salah B, Dinh Xuan AT, Fouilladieu JL, Lockhart A, Regnard J. Nasal mucociliary  
1972 transport in healthy subjects is slower when breathing dry air. *Eur Respir J* 1988;1(9):852-5.
- 1973 32. Negus VE. Humidification of the air passages. *Thorax* 1952;7(2):148-51.
- 1974 33. Groves DS, Durbin CG, Jr. Tracheostomy in the critically ill: indications, timing and  
1975 techniques. *Curr Opin Crit Care* 2007;13(1):90-7.
- 1976 34. Parke R, McGuinness S, Eccleston M. Nasal high-flow therapy delivers low level  
1977 positive airway pressure. *Br J Anaesth* 2009;103(6):886-90.
- 1978 35. Locke RG, Wolfson MR, Shaffer TH, Rubenstein SD, Greenspan JS. Inadvertent  
1979 administration of positive end-distending pressure during nasal cannula flow. *Pediatrics*  
1980 1993;91(1):135-8.

- 1981 36. Ritchie JE, Williams AB, Gerard C, Hockey H. Evaluation of a humidified nasal high-  
1982 flow oxygen system, using oxygraphy, capnography and measurement of upper airway  
1983 pressures. *Anaesth Intensive Care* 2011;39(6):1103-10.
- 1984 37. Volsko TA, Fedor K, Amadei J, Chatburn RL. High flow through a nasal cannula and  
1985 CPAP effect in a simulated infant model. *Respir Care* 2011;56(12):1893-900.
- 1986 38. Riera J, Perez P, Cortes J, Roca O, Masclans JR, Rello J. Effect of high-flow nasal  
1987 cannula and body position on end-expiratory lung volume: a cohort study using electrical  
1988 impedance tomography. *Respir Care* 2013;58(4):589-96.
- 1989 39. Corley A, Bull T, Spooner AJ, Barnett AG, Fraser JF. Direct extubation onto high-  
1990 flow nasal cannulae post-cardiac surgery versus standard treatment in patients with a BMI  
1991  $\geq 30$ : a randomised controlled trial. *Intensive Care Med* 2015;41(5):887-94.
- 1992 40. Maggiore SM, Idone FA, Vaschetto R, et al. Nasal high-flow versus Venturi mask  
1993 oxygen therapy after extubation. Effects on oxygenation, comfort, and clinical outcome. *Am J*  
1994 *Respir Crit Care Med* 2014;190(3):282-8.
- 1995 41. Vourc'h M, Asfar P, Volteau C, et al. High-flow nasal cannula oxygen during  
1996 endotracheal intubation in hypoxemic patients: a randomized controlled clinical trial.  
1997 *Intensive Care Med* 2015;2015:14.
- 1998 42. Kang BJ, Koh Y, Lim CM, et al. Failure of high-flow nasal cannula therapy may delay  
1999 intubation and increase mortality. *Intensive Care Med* 2015;41(4):623-32.
- 2000 43. Messika J, Ben Ahmed K, Gaudry S, et al. Use of High-Flow Nasal Cannula Oxygen  
2001 Therapy in Subjects With ARDS: A 1-Year Observational Study. *Respir Care*  
2002 2015;60(2):162-9.

- 2003 44. Parke R, McGuinness S, Dixon R, Jull A. Open-label, phase II study of routine high-  
2004 flow nasal oxygen therapy in cardiac surgical patients. *Br J Anaesth* 2013;111(6):925-31.
- 2005 45. Lucangelo U, Vassallo FG, Marras E, et al. High-flow nasal interface improves  
2006 oxygenation in patients undergoing bronchoscopy. *Crit Care Res Pract*  
2007 2012;2012(506382):506382.
- 2008 46. Simon M, Braune S, Frings D, Wiontzek AK, Klose H, Kluge S. High-flow nasal  
2009 cannula oxygen versus non-invasive ventilation in patients with acute hypoxaemic respiratory  
2010 failure undergoing flexible bronchoscopy--a prospective randomised trial. *Crit Care*  
2011 2014;18(6):712.
- 2012 47. Parke RL, McGuinness SP. Pressures delivered by nasal high flow oxygen during all  
2013 phases of the respiratory cycle. *Respir Care* 2013;58(10):1621-4.
- 2014 48. Roca O, Riera J, Torres F, Masclans JR. High-flow oxygen therapy in acute  
2015 respiratory failure. *Respir Care* 2010;55(4):408-13.
- 2016 49. Rello J, Perez M, Roca O, et al. High-flow nasal therapy in adults with severe acute  
2017 respiratory infection: a cohort study in patients with 2009 influenza A/H1N1v. *J Crit Care*  
2018 2012;27(5):434-9.
- 2019 50. Nagata K, Morimoto T, Fujimoto D, et al. Efficacy of High-Flow Nasal Cannula  
2020 Therapy in Acute Hypoxemic Respiratory Failure: Decreased Use of Mechanical Ventilation.  
2021 *Respir Care* 2015;2015(23):04026.
- 2022 51. Lenglet H, Sztrymf B, Leroy C, Brun P, Dreyfuss D, Ricard JD. Humidified high flow  
2023 nasal oxygen during respiratory failure in the emergency department: feasibility and efficacy.  
2024 *Respir Care* 2013;57(11):1873-8.

2025 52. Rittayamai N, Tscheikuna J, Praphruetkit N, Kijpinyochai S. Use of High-Flow Nasal  
2026 Cannula for Acute Dyspnea and Hypoxemia in the Emergency Department. *Respir Care*  
2027 2015;2015(9):03837.

2028 53. Futier E, Paugam-Burtz C, Constantin JM, Pereira B, Jaber S. The OPERA trial -  
2029 comparison of early nasal high flow oxygen therapy with standard care for prevention of  
2030 postoperative hypoxemia after abdominal surgery: study protocol for a multicenter  
2031 randomized controlled trial. *Trials* 2013;14(341):341.

2032 54. Miguel-Montanes R, Hajage D, Messika J, et al. Use of high-flow nasal cannula  
2033 oxygen therapy to prevent desaturation during tracheal intubation of intensive care patients  
2034 with mild-to-moderate hypoxemia. *Crit Care Med* 2015;43(3):574-83.

2035 55. Tiruvoipati R, Lewis D, Haji K, Botha J. High-flow nasal oxygen vs high-flow face  
2036 mask: a randomized crossover trial in extubated patients. *J Crit Care* 2010;25(3):463-8.

2037 56. Brotfain E, Zlotnik A, Schwartz A, et al. Comparison of the effectiveness of high flow  
2038 nasal oxygen cannula vs. standard non-rebreather oxygen face mask in post-extubation  
2039 intensive care unit patients. *Isr Med Assoc J* 2014;16(11):718-22.

2040 57. Lee HY, Rhee CK, Lee JW. Feasibility of high-flow nasal cannula oxygen therapy for  
2041 acute respiratory failure in patients with hematologic malignancies: A retrospective single-  
2042 center study. *J Crit Care* 2015;30(4):773-7.

2043 58. Epstein AS, Hartridge-Lambert SK, Ramaker JS, Voigt LP, Portlock CS. Humidified  
2044 high-flow nasal oxygen utilization in patients with cancer at Memorial Sloan-Kettering  
2045 Cancer Center. *J Palliat Med* 2011;14(7):835-9.

2046 59. Hui D, Morgado M, Chisholm G, et al. High-flow oxygen and bilevel positive airway  
2047 pressure for persistent dyspnea in patients with advanced cancer: a phase II randomized trial. *J*  
2048 *Pain Symptom Manage* 2013;46(4):463-73.

2049 60. Roca O, de Acilu MG, Caralt B, Sacanell J, Masclans JR. Humidified high flow nasal  
2050 cannula supportive therapy improves outcomes in lung transplant recipients readmitted to the  
2051 intensive care unit because of acute respiratory failure. *Transplantation* 2015;99(5):1092-8.

2052 61. Peters SG, Holets SR, Gay PC. High-flow nasal cannula therapy in do-not-intubate  
2053 patients with hypoxemic respiratory distress. *Respir Care* 2013;58(4):597-600.

2054 62. Mokart D, Geay C, Chow-Chine L, et al. High-flow oxygen therapy in cancer patients  
2055 with acute respiratory failure. *Intensive Care Med* 2015;2015:4.

2056 63. Lemiale V, Resche-Rigon M, Azoulay E. Early non-invasive ventilation for acute  
2057 respiratory failure in immunocompromised patients (IVNIctus): study protocol for a  
2058 multicenter randomized controlled trial. *Trials* 2015;15(372):372.

2059 64. Kaji AH, Lewis RJ. Noninferiority Trials: Is a New Treatment Almost as Effective as  
2060 Another? *JAMA* 2015;313(23):2371-2.

2061 65. Ferrer M, Valencia M, Nicolas JM, Bernadich O, Badia JR, Torres A. Early NIV  
2062 averts extubation failure in patients at risk trial. *Am J Respir Crit Care Med* 2006;173(2):164-  
2063 70.

2064 66. Coudroy R, Jamet A, Petua P, Robert, Frat JP, Thille A. High-flow nasal cannula  
2065 oxygen therapy versus noninvasive ventilation in immunocompromised patients with acute  
2066 respiratory failure: an observational cohort study. *Ann Intensive Care*. 2016 Dec;6(1):45.



2067 67. Frat JP, Ragot S, Girault C, Perbet S, Prat G, Boulain T, Demoule A, Ricard JD,  
2068 Coudroy R, Robert R, Mercat A, Brochard L, Thille AW; REVA network. Effect of non-  
2069 invasive oxygenation strategies in immunocompromised patients with severe acute respiratory  
2070 failure: a post-hoc analysis of a randomised trial. *Lancet Respir Med.* 2016 Aug;4(8):646-652.

2071 68. Azoulay E, Pickkers P, Soares M, Perner A, Rello J, Bauer PR, van de Louw A,  
2072 Hemelaar P, Lemiale V, Taccone FS, Martin Loeches I, Meyhoff TS, Salluh J,  
2073 Schellongowski P, Rusinova K, Terzi N, Mehta S, Antonelli M, Kouatchet A, Barratt-Due A,  
2074 Valkonen M, Landburg PP, Bruneel F, Bukan RB, Pène F, Metaxa V, Moreau AS, Soupart  
2075 V, Burghi G, Girault C, Silva UVA, Montini L, Barbier F, Nielsen LB, Gaborit B, Mokart D,  
2076 Chevret S. Efraim investigators and the Nine-I study group. Acute hypoxemic respiratory  
2077 failure in immunocompromised patients: the Efraim multinational prospective cohort study.  
2078 *Intensive Care Med.* 2017 Dec;43(12):1808-1819.

2079 69. Garner JS, Jarvis WR, Emori TG, Horan TC, Hughes JM. CDC definitions for  
2080 nosocomial infections, 1988. *Am J Infect Control.* 1988;16(3):128-140.

2081

**Table 1: Definitions for oxygen delivery devices and reported outcomes using HFNO**

| <b>Definitions</b>                    |                                                                                                                                                                                                                                                                                                                                                                                                                                                                                                                                                                                   |
|---------------------------------------|-----------------------------------------------------------------------------------------------------------------------------------------------------------------------------------------------------------------------------------------------------------------------------------------------------------------------------------------------------------------------------------------------------------------------------------------------------------------------------------------------------------------------------------------------------------------------------------|
| <b>HFNO</b>                           | Device that delivers humidified and warmed high-flow oxygen at flows greater than 15 L/min.                                                                                                                                                                                                                                                                                                                                                                                                                                                                                       |
| <b>Usual oxygen therapy devices</b>   | <p>Devices used to treat spontaneously ventilating patients in the ICU who require supplemental oxygen. They deliver either</p> <ul style="list-style-type: none"> <li>- low-flow oxygen [including nasal cannula, Ventimask® without Venturi effect, and non-rebreather mask]</li> <li>- or medium-flow oxygen [Venturi masks and medium-flow facemasks]</li> </ul>                                                                                                                                                                                                              |
| <b>Non-invasive ventilation (NIV)</b> | Administration of ventilatory support without using an endotracheal tube or tracheostomy tube. Ventilatory support can be provided through diverse interfaces (mouthpiece, nasal mask, facemask, or helmet), using a variety of ventilatory modes (e.g., volume ventilation, pressure support, bi-level positive airway pressure [BiPAP; see the image below], proportional-assist ventilation [PAV], and continuous positive airway pressure [CPAP]) with either dedicated NIV ventilators or ventilators also capable of providing support through an endotracheal tube or mask |
| <b>Clinical outcomes in HFNO</b>      | <b>Assessed by measuring</b>                                                                                                                                                                                                                                                                                                                                                                                                                                                                                                                                                      |
| <b>Oxygenation</b>                    | Continuous SpO <sub>2</sub>                                                                                                                                                                                                                                                                                                                                                                                                                                                                                                                                                       |

|                                      |                                                                                                                                                         |
|--------------------------------------|---------------------------------------------------------------------------------------------------------------------------------------------------------|
| <b>[desaturation]</b>                | PaO <sub>2</sub> at fixed times<br><br>PaO <sub>2</sub> /FiO <sub>2</sub> ratio                                                                         |
| <b>Ventilation</b>                   | PaCO <sub>2</sub>                                                                                                                                       |
| <b>Airway pressures</b>              | Nasopharyngeal or hypopharyngeal catheter                                                                                                               |
| <b>Work of breathing</b>             | Respiratory rate                                                                                                                                        |
| <b>Patient comfort and adherence</b> | Visual analogue scale [VAS] for breathing difficulties<br><br>Satisfaction and tolerance; Global comfort<br><br>Dyspnoea [VAS or Borg scale], dry mouth |
| <b>Cardiovascular status</b>         | Heart rate<br><br>Shock; Need for vasopressors                                                                                                          |
| <b>Complications</b>                 | Need for NIV<br><br>Need for intubation and mechanical ventilation [MV]; Mortality                                                                      |

2083

2084

2085

2086 **Table 2: Drawbacks of standard oxygen therapy that limit the effectiveness and**  
2087 **tolerance of oxygen delivery**

|                                                                                                                                                                                                                                                                                                                                                                                                                                         |
|-----------------------------------------------------------------------------------------------------------------------------------------------------------------------------------------------------------------------------------------------------------------------------------------------------------------------------------------------------------------------------------------------------------------------------------------|
| <p><b>Oxygen is not humidified at low flow</b></p> <ul style="list-style-type: none"><li>- <b>dry nose</b></li><li>- <b>dry throat</b></li><li>- <b>dry mouth</b></li><li>- <b>nasal pain</b></li><li>- <b>ocular irritation,</b></li><li>- <b>nasal and ocular trauma</b></li><li>- <b>discomfort related to the mask</b></li><li>- <b>gastric distension</b></li><li>- <b>aspiration</b></li><li>- <b>global discomfort</b></li></ul> |
| <p><b>Insufficient heating leads to poor tolerance of oxygen therapy</b></p>                                                                                                                                                                                                                                                                                                                                                            |
| <p><b>Unwarmed and dry gas may cause bronchoconstriction and may decrease pulmonary compliance and conductance.</b></p>                                                                                                                                                                                                                                                                                                                 |
| <p><b>With low/medium-flow devices, oxygen cannot be delivered at flows greater than 15 L/min, whereas inspiratory flow in patients with respiratory failure varies widely and is considerably higher, between 30 and more than 100 L/min.</b></p>                                                                                                                                                                                      |
| <p><b>Given the difference between the patient's inspiratory flow and the delivered flow, <math>FiO_2</math> is both variable and often lower than needed.</b></p>                                                                                                                                                                                                                                                                      |

2088

2089

**Table 3: Physiological benefits of HFNO compared to conventional oxygen therapy**

|                                                                                                                                                                                                                                                                                                                                                                                                                     |
|---------------------------------------------------------------------------------------------------------------------------------------------------------------------------------------------------------------------------------------------------------------------------------------------------------------------------------------------------------------------------------------------------------------------|
| <p><i>FiO<sub>2</sub> values are higher and more stable</i></p> <p><b>because the delivered flow rate is higher than the spontaneous inspiratory demand and because the difference between the delivered flow rate and the patient’s inspiratory flow rate is smaller.</b></p> <p>☞ <b>The flow rate must be set to match the patient’s inspiratory demand and/or the severity of the respiratory distress.</b></p> |
| <p><i>The anatomical dead space is decreased, via washout of the nasopharyngeal space</i></p> <p><b>Consequently, a larger fraction of the minute ventilation reaches the alveoli, where it can participate in gas exchange.</b></p> <p><b>Respiratory efforts become more efficient.</b></p> <p><b>Thoraco-abdominal synchrony improves.</b></p>                                                                   |
| <p><i>The work of breathing is decreased</i></p> <p><b>because HFNO mechanically stents the airway,</b></p> <p><b>provides flow rates that match the patient’s inspiratory flow, and</b></p> <p><b>markedly attenuates the inspiratory resistance associated with the nasopharynx, thereby eliminating the attendant work of breathing.</b></p>                                                                     |
| <p><i>The gas delivered is heated and humidified</i></p>                                                                                                                                                                                                                                                                                                                                                            |

**Warm humid gas reduces the work of breathing and improves mucociliary function, thereby facilitating secretion clearance, decreasing the risk of atelectasis, and improving the ventilation/perfusion ratio and oxygenation.**

**The body is spared the energy cost of warming and humidifying the inspired gas.**

**Warm humid gas is associated with better conductance and pulmonary compliance compared to dry, cooler gas.**

**☞ HFNO delivers adequately warmed and humidified gas only when the flow rate is >40 L/min.**

*Positive airway pressures are increased*

**The nasal cannula generates continuous positive pressures in the pharynx of up to 8 cm H<sub>2</sub>O.**

**The positive pressure distends the lungs, ensuring lung recruitment and decreasing the ventilation-perfusion mismatch in the lungs.**

**End-expiratory lung volume is greater with HFNO than with low-flow oxygen therapy.**

**☞ Minimising leaks around the cannula prongs is of the utmost importance.**

2091

2092

2093 **Table 4: Clinical studies on HFNO therapy in adults with hypoxemic acute**  
 2094 **respiratory failure (ARF)**

| Reference                                             | Study design                                                             | Population                                      | N patients | Results                                                                               |
|-------------------------------------------------------|--------------------------------------------------------------------------|-------------------------------------------------|------------|---------------------------------------------------------------------------------------|
| <b>Hypoxemic acute respiratory failure in the ICU</b> |                                                                          |                                                 |            |                                                                                       |
| 22                                                    | Cohort, unselected patients.<br>HFNO 50 L/min vs. face mask<br>oxygen    | Hypoxaemic<br>ARF                               | 38         | Improved oxygen<br>Decreased respir                                                   |
| 23                                                    | Cohort, unselected patients.<br>HFNO 20-30 L/min vs. face mask<br>oxygen | Hypoxaemic<br>ARF                               | 20         | Improved oxygen<br>Decreases in resp<br>distress, and thoraco                         |
| 47                                                    | HFNO compared to face mask<br>oxygen                                     | Hypoxaemic<br>ARF                               | 60         | Decreased treatm<br>30% to 10%. Fewer                                                 |
| 48                                                    | Cohort study, HFNO 20-30<br>L/min vs. face mask oxygen                   | Hypoxaemic<br>ARF                               | 20         | Improved comfo                                                                        |
| 49                                                    | Cohort study (post hoc)                                                  | Hypoxaemic<br>ARF (2009<br>A/H1N1v<br>outbreak) | 20         | 9/20 (45%) succo<br>vasopressors require<br>hours of HFNO, non<br>and needed higher o |

|                                                      |                                                                                                                                   |                                                         |     |                                                                                             |
|------------------------------------------------------|-----------------------------------------------------------------------------------------------------------------------------------|---------------------------------------------------------|-----|---------------------------------------------------------------------------------------------|
| 43                                                   | Observational, single-centre study                                                                                                | ARDS                                                    | 45  | 40% intubation rate<br>SAPSII, development<br>toward lower PaO <sub>2</sub> /F              |
| 13                                                   | Multicentre, open-label RCT with 3 groups: HFNO, usual oxygen therapy (face mask), or non-invasive positive-pressure ventilation. | Hypoxaemic ARF, PaO <sub>2</sub> /FiO <sub>2</sub> ≤300 | 310 | Intubation rate w<br>oxygen, and 50% wi<br>days by day 28 was<br>Decreased D-90 mor         |
| 50                                                   | Retrospective before/after study of HFNO                                                                                          | Hypoxaemic ARF                                          | 172 | Reduced need fo<br>decreased ventilator-                                                    |
| 42                                                   | Patients intubated after HFNO                                                                                                     | Hypoxaemic ARF                                          | 175 | In patients intuba<br>(%), higher extubatio<br>ventilator-free days.<br>decreased ICU morta |
| <b>Hypoxemic acute respiratory failure in the ED</b> |                                                                                                                                   |                                                         |     |                                                                                             |
| 51                                                   | Patients with ARF (>9 L/min oxygen or clinical signs of respiratory distress)                                                     | Hypoxaemic ARF                                          | 17  | Decreased dyspn<br>oxygenation                                                              |
| 52                                                   | RCT of HFNO vs. standard oxygen for 1 h                                                                                           | Hypoxaemic ARF                                          | 40  | Decreased dyspn                                                                             |

2095

2096



2097

2098
