# Supplementary material
Source: PubMed Central journal article supplement (PMC6583581)
Supplement: jama-320-2099-s003.pdf [file jama-320-2099-s003.pdf]

Azoulay E, Lemiale V, Mokart D, et al. Effect of high-flow nasal oxygen vs standard oxygen on 28-day mortality in immunocompromised patients with acute respiratory failure: the HIGH randomized clinical trial. *JAMA*. doi:10.1001/jama.2018.14282

## **Data Sharing Statement**

### **Data**

**Data available:** No

### **Additional Information**

**Explanation for why data not available:** for now, we have an engagement to already share the data for an individual patient level meta-analysis
